# Supplementary material for: SOX4 regulates invasion of bladder cancer cells via repression of WNT5a
Source: PubMed Central journal article supplement — Int J Oncol. 2019 Jun 26;55(2):359–70. doi: 10.3892/ijo.2019.4832 (PMC6615919; doi:10.3892/ijo.2019.4832), 2019-06-26
Supplement: Supplementary_Data.pdf [file Supplementary_Data.pdf]

Figure S1. KRAB-dCas9-mcherry constructs. Phase and fluorescent imaging showing K-dCas9-mcherry expression in T24-Scr, T24-SOX4-KD and dual mCherry+/YFP+ in T24-SOX4-Rescue cells.

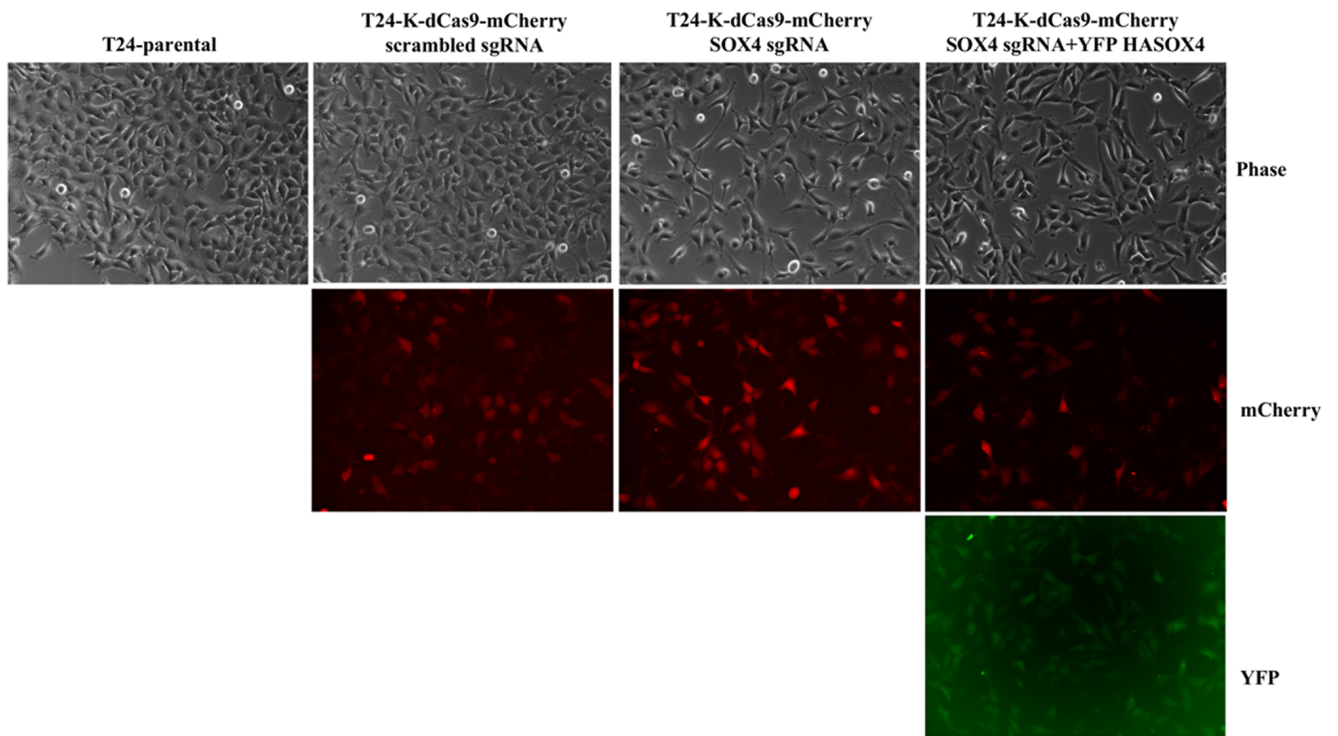

Figure S2. SOX4 knockdown or re-expression has no effect on canonical EMT markers. Western blot analysis indicating Cas9 expression in T24-Scrambled, T24-Sox4-KD and T24-SOX4-Rescue compared to T24 parental cells. SOX4-KD exerted no changes in EMT markers ZEB1 or N-cadherin. T24 cell lines did not express E-cadherin.

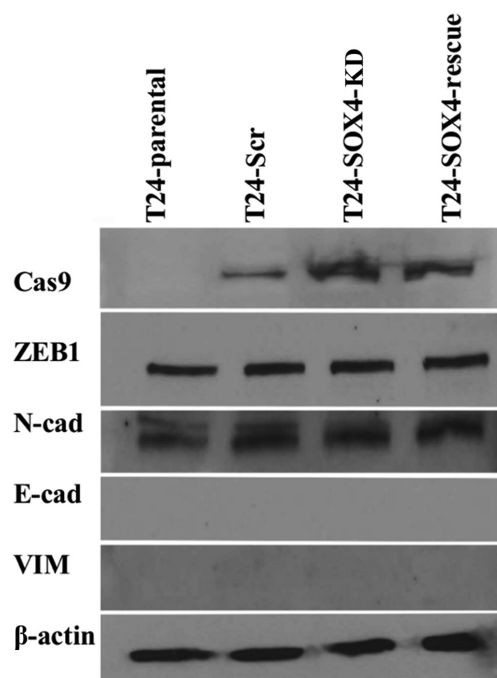

Figure S3. Microarray analysis of T24-Scr vs T24-SOX4-KD. (A) IPA analysis revealed cholesterol genes most significantly deregulated along with Wnt/ $\beta$ -catenin and osteoarthritis pathways. (B) RT-qPCR validation of Clariom D microarray for selected number of cholesterol related genes confirms repressed mRNA in T24-SOX4-KD and confirmed no changes in mRNA expression of cholesterol genes in T24-SOX4-Rescue. (C) RT-qPCR of TNC and IDO validated the microarray data. \*P<0.05

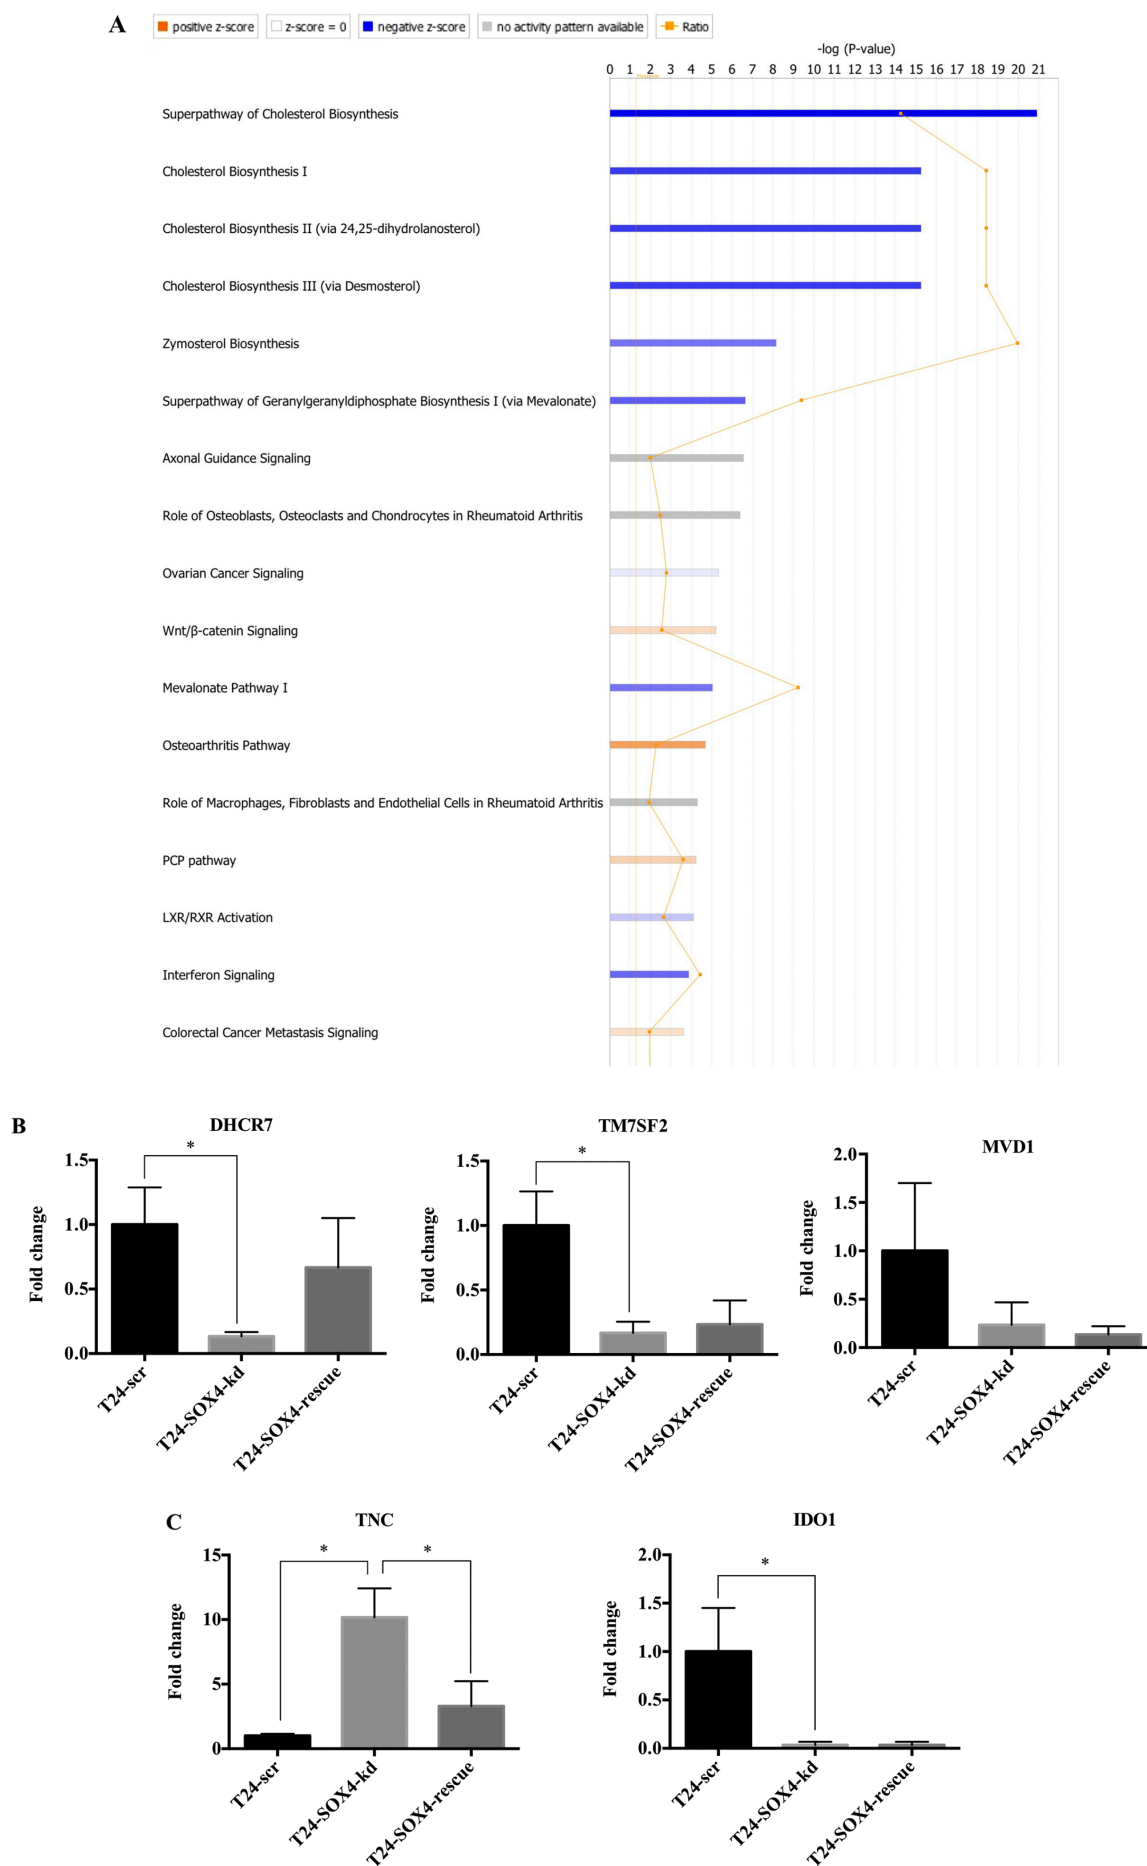

**Table SI. A total of 1,487 genes significantly affected by SOX4 knockdown compared to T24-Scr cells.**

| Significant - positive |                   |             |             |
|------------------------|-------------------|-------------|-------------|
| Gene ID                | Probe ID          | Fold change | q-value (%) |
| TNC                    | TC0900011305.hg.1 | 176.6674056 | 0           |
| stawswu                | TC0900008530.hg.1 | 78.5390731  | 0           |
| STC1                   | TC0800009891.hg.1 | 58.5209824  | 0           |
| MMP1                   | TC1100012131.hg.1 | 50.28268382 | 0           |
| IL13RA2                | TC0X00010557.hg.1 | 38.79299479 | 0           |
| WNT5A                  | TC0300011247.hg.1 | 36.39312838 | 0           |
| MAN1A1                 | TC0600013010.hg.1 | 33.21966225 | 0           |
| GABRG2                 | TC0500009304.hg.1 | 28.22540415 | 0           |
| TNFRSF11B              | TC0800011611.hg.1 | 24.55307678 | 0           |
| DNER                   | TC0200015958.hg.1 | 24.31982878 | 0           |
| PRLR                   | TC0500010480.hg.1 | 24.11042901 | 0           |
| SEMA5A                 | TC0500010043.hg.1 | 22.73633009 | 0.407942629 |
| ---                    | TC2000009329.hg.1 | 19.19431053 | 0           |
| CTSS                   | TC0100015752.hg.1 | 18.93459511 | 0           |
| SERPINB2               | TC1800009242.hg.1 | 18.01686383 | 1.037101959 |
| PARM1                  | TC0400007868.hg.1 | 17.7883721  | 0           |
| TSPAN18                | TC1100007400.hg.1 | 17.20424588 | 0           |
| SSX1                   | TC0X00007176.hg.1 | 16.66698218 | 0           |
| ---                    | TC2000009931.hg.1 | 16.00313241 | 0           |
| VCAN                   | TC0500007972.hg.1 | 15.89209866 | 0           |
| ITGA11                 | TC1500009861.hg.1 | 15.8731476  | 0.263891671 |
| WFDC2                  | TC2000007492.hg.1 | 14.3234521  | 0.664908359 |
| ADAMTS9                | TC0300011391.hg.1 | 13.83054481 | 0           |
| AOX1                   | TC0200010421.hg.1 | 13.0955296  | 0           |
| NOV                    | TC0800008667.hg.1 | 11.93727181 | 2.472534784 |
| starawbo               | TC0100013053.hg.1 | 11.28481477 | 0           |
| SMR3A                  | TC0400012808.hg.1 | 11.16133093 | 2.472534784 |
| SMR3B                  | TC0400012809.hg.1 | 10.75480094 | 1.607801004 |
| DUSP10                 | TC0100017420.hg.1 | 10.4417968  | 0           |
| SLC14A1                | TC1800007198.hg.1 | 10.41461005 | 0           |
| FAM133A                | TC0X00007851.hg.1 | 10.24929366 | 0           |
| reniru                 | TC2000008164.hg.1 | 9.888974482 | 0           |
| beepabu                | TC0100007086.hg.1 | 9.79237744  | 0           |
| NTRK2                  | TC0900007752.hg.1 | 9.533549806 | 0.263891671 |
| FEZ1                   | TC1100012708.hg.1 | 9.233914239 | 0           |
| APCDD1L-AS1            | TC2000007902.hg.1 | 9.202596672 | 0           |
| AP003900.6             | TC2100007560.hg.1 | 9.030815364 | 0           |
| LOC283352              | TC1200009378.hg.1 | 8.90863873  | 0           |

|             |                   |             |             |
|-------------|-------------------|-------------|-------------|
| flawrobu    | TC0100007076.hg.1 | 8.856051837 | 0           |
| PTPRU       | TC0100007584.hg.1 | 8.655144064 | 0           |
| AC003088.1  | TC0700012253.hg.1 | 8.638048998 | 0           |
| SLC16A6     | TC1700011558.hg.1 | 8.637526111 | 1.607801004 |
| LINC00973   | TC0300008123.hg.1 | 8.62080843  | 0           |
| THBS2       | TC0600013998.hg.1 | 8.610560089 | 0           |
| RIMS2       | TC0800008487.hg.1 | 8.212628278 | 0           |
| SIRPB1      | TC2000009970.hg.1 | 8.146530884 | 0.263891671 |
| STEAP1      | TC0700008292.hg.1 | 8.129718603 | 0           |
| NAV3        | TC1200008269.hg.1 | 7.911558027 | 0           |
| PLAUR       | TC1900010856.hg.1 | 7.746918166 | 0           |
| GDA         | TC0900007552.hg.1 | 7.482307461 | 0           |
| SDC2        | TC0800008299.hg.1 | 7.457188621 | 0           |
| ---         | TC0900008601.hg.1 | 7.421623167 | 0.407942629 |
| SLC16A7     | TC1200007931.hg.1 | 7.391969223 | 0           |
| XDH         | TC0200012163.hg.1 | 7.272799228 | 0           |
| BACE2       | TC2100007198.hg.1 | 6.974796702 | 0           |
| ---         | TC0400010660.hg.1 | 6.965609439 | 0           |
| ---         | TC0800007462.hg.1 | 6.8731717   | 1.037101959 |
| RAB27B      | TC1800007360.hg.1 | 6.74721827  | 0           |
| ---         | TC0300011389.hg.1 | 6.721417021 | 0           |
| MAGEC2      | TC0X00011001.hg.1 | 6.54786427  | 0           |
| KLF2        | TC1900007270.hg.1 | 6.545006311 | 0.664908359 |
| VDR         | TC1200010559.hg.1 | 6.424627978 | 1.607801004 |
| CD82        | TC1100007394.hg.1 | 6.422328677 | 0           |
| SULF2       | TC2000009317.hg.1 | 6.340569822 | 0           |
| SIRPD       | TC2000009969.hg.1 | 6.292151175 | 0.407942629 |
| GRIP1       | TC1200011140.hg.1 | 6.254806123 | 0           |
| ---         | TC2000008315.hg.1 | 6.244843136 | 1.037101959 |
| GOS2        | TC0100011453.hg.1 | 6.23476781  | 0           |
| PALM2-AKAP2 | TC0900012158.hg.1 | 6.20438767  | 0           |
| spoyployby  | TC0500007974.hg.1 | 6.172245375 | 0.263891671 |
| ---         | TC1900011214.hg.1 | 6.16400237  | 0           |
| PPP1R15A    | TC1900008496.hg.1 | 6.088552722 | 0           |
| GPR158      | TC1000007061.hg.1 | 5.997774368 | 0           |
| GABRA3      | TC0X00011126.hg.1 | 5.994580649 | 0           |
| BAGE        | TC2100008486.hg.1 | 5.986154439 | 0           |
| TRIML2      | TC0400012696.hg.1 | 5.921229752 | 0           |
| PIK3CG      | TC0700008743.hg.1 | 5.899896925 | 0           |
| RNA5SP53    | TC0100014957.hg.1 | 5.888189762 | 0           |
| SIRPA       | TC2000006501.hg.1 | 5.881272484 | 0           |

|               |                     |             |             |
|---------------|---------------------|-------------|-------------|
| EDNRA         | TC0400008943.hg.1   | 5.744239226 | 0.407942629 |
| ROBO1         | TC0300011628.hg.1   | 5.732772719 | 0           |
| fushor        | TC0900011307.hg.1   | 5.715490243 | 3.845686185 |
| LRRN4         | TC2000008316.hg.1   | 5.652610344 | 0.664908359 |
| PDZD2         | TC0500007050.hg.1   | 5.60188584  | 0           |
| PPP1R14C      | TC0600009831.hg.1   | 5.582812099 | 0           |
| CAMK2N1       | TC0100013182.hg.1   | 5.532449332 | 0           |
| KITLG         | TC1200011460.hg.1   | 5.462730814 | 1.607801004 |
| HAS2          | TC0800011646.hg.1   | 5.461168485 | 3.845686185 |
| PAG1          | TC0800010926.hg.1   | 5.414377269 | 0           |
| SEMA7A        | TC1500010018.hg.1   | 5.392704257 | 0           |
| NFATC2        | TC2000009458.hg.1   | 5.366224827 | 0.664908359 |
| STEAP1B       | TC0700010443.hg.1   | 5.329541475 | 0           |
| GLIS3         | TC0900009424.hg.1   | 5.256747115 | 1.607801004 |
| MMP3          | TC1100012133.hg.1   | 5.140184581 | 0.407942629 |
| MGLL          | TC0300012323.hg.1   | 5.115652735 | 0.263891671 |
|               | HTA2-pos-3371052_st | 5.022320741 | 3.845686185 |
| COL6A2        | TC2100007451.hg.1   | 4.957763091 | 0           |
| ELAVL2        | TC0900009740.hg.1   | 4.916194235 | 0           |
| ---           | TC0X00010228.hg.1   | 4.911243432 | 0           |
| KCNAB2        | TC0100006675.hg.1   | 4.909964465 | 0           |
| NEO1          | TC1500007814.hg.1   | 4.893547941 | 0           |
| MAMLD1        | TC0X00008712.hg.1   | 4.887554083 | 0           |
| ---           | TC0600009216.hg.1   | 4.881460984 | 0.263891671 |
| kunemi        | TC1200008044.hg.1   | 4.869524547 | 3.845686185 |
| RP5-907D15.3  | TC2000007903.hg.1   | 4.816004533 | 0           |
| RP11-323N12.5 | TC1700009064.hg.1   | 4.802787297 | 0.407942629 |
| DPP4          | TC0200014764.hg.1   | 4.789068817 | 1.607801004 |
| DISC1FP1      | TC1100008740.hg.1   | 4.746571285 | 0           |
| LAMC2         | TC0100010867.hg.1   | 4.682405895 | 3.845686185 |
| L1CAM         | TC0X00011413.hg.1   | 4.64828169  | 0.263891671 |
| PROX1         | TC0100011566.hg.1   | 4.643514318 | 0           |
| ROR1          | TC0100008594.hg.1   | 4.622542765 | 0           |
| ZDHHC20-IT1   | TC1300008290.hg.1   | 4.617683896 | 0.664908359 |
| CTC-338M12.9  | TC0500009766.hg.1   | 4.609359896 | 0.407942629 |
| STEAP2        | TC0700008293.hg.1   | 4.55836121  | 1.037101959 |
| CSTA          | TC0300008550.hg.1   | 4.541076214 | 0           |
| VCAN-AS1      | TC0500011344.hg.1   | 4.54093772  | 0           |
| PPP4R4        | TC1400008058.hg.1   | 4.499254318 | 0           |
| CREB5         | TC0700007034.hg.1   | 4.493729653 | 0           |
| CTD-2538G9.3  | TC1900007293.hg.1   | 4.485238132 | 1.607801004 |

|               |                              |             |             |
|---------------|------------------------------|-------------|-------------|
| SEL1L3        | TC0400010282.hg.1            | 4.473816758 | 1.037101959 |
| FGF13         | TC0X00010954.hg.1            | 4.431012305 | 0.407942629 |
| GLT8D2        | TC1200011752.hg.1            | 4.42430241  | 0.263891671 |
| jornoyby      | TC1000010279.hg.1            | 4.400231468 | 1.037101959 |
| MTSS1         | TC0800011713.hg.1            | 4.393003808 | 0           |
| flonu         | TC1200008046.hg.1            | 4.38023316  | 1.037101959 |
| AC090044.2    | TC0300006444.hg.1            | 4.353031369 | 0.407942629 |
| AL133493.2    | TC2100007430.hg.1            | 4.348822524 | 0.664908359 |
| ---           | TCUn_KI270742v100006435.hg.1 | 4.348216426 | 1.607801004 |
| BAGE5         | TC2200006432.hg.1            | 4.347897712 | 0           |
| MME           | TC0300009258.hg.1            | 4.341583758 | 0.407942629 |
| MAP3K7CL      | TC2100006854.hg.1            | 4.340642684 | 0.263891671 |
| kunemi        | TC1200008043.hg.1            | 4.308746336 | 2.472534784 |
| PREX1         | TC2000009357.hg.1            | 4.2897146   | 0           |
| CD68          | TC1700012191.hg.1            | 4.28349083  | 0           |
| KCND2         | TC0700008918.hg.1            | 4.274053104 | 1.607801004 |
| CR1L          | TC0100011417.hg.1            | 4.26752469  | 1.037101959 |
| ATP2B1        | TC1200011474.hg.1            | 4.245077326 | 0.263891671 |
| U7            | TC0300008124.hg.1            | 4.151601825 | 3.845686185 |
| CADPS2        | TC0700012444.hg.1            | 4.0976618   | 1.037101959 |
| LINC00702     | TC1000009629.hg.1            | 4.096300111 | 0           |
| studaw        | TC0200007763.hg.1            | 4.096049784 | 1.037101959 |
| noypubo       | TC0200008908.hg.1            | 4.067614151 | 0.263891671 |
| CLMP          | TC1100012615.hg.1            | 4.015123415 | 1.037101959 |
| CPED1         | TC0700008928.hg.1            | 4.00826877  | 2.472534784 |
| LINC01291     | TC0200016478.hg.1            | 3.999663376 | 3.845686185 |
| HCLS1         | TC0300012166.hg.1            | 3.999258401 | 0.407942629 |
| sloygobu      | TC0300009315.hg.1            | 3.98849209  | 1.607801004 |
| PRICKLE1      | TC1200010459.hg.1            | 3.987229323 | 0           |
| NTNG1         | TC0100009307.hg.1            | 3.934092375 | 0           |
| BCL2A1        | TC1500010184.hg.1            | 3.934076468 | 0.263891671 |
| PVRL1         | TC1100012535.hg.1            | 3.933282795 | 1.037101959 |
| ATP2B4        | TC0100011267.hg.1            | 3.931021261 | 1.037101959 |
| MMP10         | TC1100012130.hg.1            | 3.897216061 | 0.664908359 |
| CTD-2291D10.4 | TC1900011696.hg.1            | 3.871499619 | 3.845686185 |
| MBNL3         | TC0X00010837.hg.1            | 3.867289232 | 0.407942629 |
| ---           | TC0X00009147.hg.1            | 3.854929342 | 1.607801004 |
| GAS6          | TC1300009924.hg.1            | 3.823453292 | 2.472534784 |
| mupyby        | TC1000010578.hg.1            | 3.821487338 | 1.037101959 |
| PCDHB6        | TC0500013242.hg.1            | 3.812941773 | 1.607801004 |
| RP11-490N5.3  | TC1300008510.hg.1            | 3.805001221 | 1.037101959 |

|               |                   |             |             |
|---------------|-------------------|-------------|-------------|
| ---           | TC1200008045.hg.1 | 3.802932283 | 2.472534784 |
| DKK3          | TC1100010123.hg.1 | 3.802625422 | 0.407942629 |
| lerkubu       | TC0100016866.hg.1 | 3.79971905  | 1.607801004 |
| ---           | TC0800009226.hg.1 | 3.792105232 | 0.407942629 |
| gogloy        | TC1100006875.hg.1 | 3.789205368 | 3.845686185 |
| DNM1          | TC0900008851.hg.1 | 3.781082514 | 0           |
| PHACTR1       | TC0600006976.hg.1 | 3.774805996 | 0           |
| SH3PXD2A      | TC1000011726.hg.1 | 3.755557057 | 1.607801004 |
| RP5-875H18.9  | TC1700008231.hg.1 | 3.755191765 | 0.407942629 |
| SIRPAP1       | TC2200007066.hg.1 | 3.742901503 | 0.263891671 |
| ADAMTS1       | TC2100007821.hg.1 | 3.736843126 | 0.664908359 |
| ZFPM2-AS1     | TC0800011417.hg.1 | 3.730545877 | 1.037101959 |
| SPHK1         | TC1700008945.hg.1 | 3.706364879 | 1.037101959 |
| EPHB1         | TC0300013877.hg.1 | 3.690665535 | 0           |
| EHD3          | TC0200007155.hg.1 | 3.690547861 | 0           |
| plafleybu     | TC0700007600.hg.1 | 3.688654506 | 1.037101959 |
| RP11-431J24.2 | TC0X00009145.hg.1 | 3.660885961 | 0.407942629 |
| CORO2B        | TC1500007677.hg.1 | 3.636287031 | 1.607801004 |
| CHST15        | TC1000012117.hg.1 | 3.595591815 | 1.607801004 |
| SIGLEC15      | TC1800007201.hg.1 | 3.578500671 | 1.037101959 |
| LAMB3         | TC0100017167.hg.1 | 3.577594809 | 0           |
| shofarby      | TC0800011717.hg.1 | 3.573675155 | 2.472534784 |
| ANKH          | TC0500010169.hg.1 | 3.571234823 | 0           |
| 41700         | TC0500011935.hg.1 | 3.551104338 | 0.263891671 |
| PRKG2         | TC0400011159.hg.1 | 3.549754701 | 0.263891671 |
| ---           | TC0600013385.hg.1 | 3.540647167 | 0.263891671 |
| WNT7A         | TC0300010350.hg.1 | 3.537422196 | 0.664908359 |
| smulerbo      | TC0200014932.hg.1 | 3.529621947 | 1.607801004 |
| MYO1D         | TC1700010358.hg.1 | 3.515270803 | 0.263891671 |
| SIPA1L2       | TC0100017748.hg.1 | 3.509030733 | 1.037101959 |
| STX3          | TC1100013012.hg.1 | 3.497263299 | 0           |
| speyployby    | TC0500007973.hg.1 | 3.494263528 | 0.263891671 |
| CD209         | TC1900009493.hg.1 | 3.473060398 | 0.664908359 |
| MMP14         | TC1400006659.hg.1 | 3.458736242 | 0           |
| PPP2R3A       | TC0300008904.hg.1 | 3.444238387 | 2.472534784 |
| snoyla        | TC0800011592.hg.1 | 3.442769278 | 2.472534784 |
| chuchee       | TC1100012050.hg.1 | 3.412063312 | 1.607801004 |
| klawstabu     | TC0500006923.hg.1 | 3.408578203 | 2.472534784 |
| TNFAIP3       | TC0600009597.hg.1 | 3.408259064 | 2.472534784 |
| GALNT3        | TC0200014809.hg.1 | 3.404071287 | 1.607801004 |
| COL12A1       | TC0600012314.hg.1 | 3.401526904 | 1.607801004 |



|               |                   |             |             |
|---------------|-------------------|-------------|-------------|
| SERPINB8      | TC1800009245.hg.1 | 3.399079645 | 0.407942629 |
| TPK1          | TC0700012917.hg.1 | 3.397318945 | 1.607801004 |
| VWA5A         | TC1100009374.hg.1 | 3.388672977 | 0.664908359 |
| CYP4F11       | TC1900009896.hg.1 | 3.383972279 | 0.664908359 |
| RP11-752L20.3 | TC0400008944.hg.1 | 3.383256363 | 0.263891671 |
| kleetoybu     | TC1800008659.hg.1 | 3.378581523 | 1.607801004 |
| TGIF2LX       | TC0X00007820.hg.1 | 3.376939696 | 0.263891671 |
| glernoy       | TC0X00007751.hg.1 | 3.374993757 | 0           |
| PLPP3         | TC0100018443.hg.1 | 3.36667432  | 1.037101959 |
| RFTN1         | TC0300010427.hg.1 | 3.362093081 | 1.037101959 |
| SEMA3A        | TC0700013579.hg.1 | 3.342974268 | 1.037101959 |
| AMTN          | TC0400007783.hg.1 | 3.342174746 | 1.037101959 |
| ---           | TC0X00010176.hg.1 | 3.335260815 | 0.263891671 |
| THSD4         | TC1500007739.hg.1 | 3.332740913 | 0.263891671 |
| TMEM255B      | TC1300010007.hg.1 | 3.329144135 | 0.263891671 |
| ITGA5         | TC1200010839.hg.1 | 3.318974396 | 0.407942629 |
| OSBPL6        | TC0200016571.hg.1 | 3.316747456 | 0           |
| ITPR3         | TC0600007711.hg.1 | 3.29510438  | 0           |
| choyrer       | TC1500007741.hg.1 | 3.292605308 | 1.037101959 |
| RP11-86A5.1   | TC0X00006833.hg.1 | 3.289300924 | 1.037101959 |
| ---           | TC1200011021.hg.1 | 3.285050009 | 3.845686185 |
| CACHD1        | TC0100008602.hg.1 | 3.264830666 | 0           |
| ---           | TC0300012896.hg.1 | 3.262058527 | 0           |
| MLPH          | TC0200011251.hg.1 | 3.251494725 | 3.845686185 |
| ---           | TC1700011148.hg.1 | 3.248866959 | 0.407942629 |
| PDCD1LG2      | TC0900006560.hg.1 | 3.245333519 | 0.407942629 |
| SLC16A2       | TC0X00007655.hg.1 | 3.239534263 | 0           |
| vawdarby      | TC0800011418.hg.1 | 3.232286134 | 1.607801004 |
| POTEE         | TC0200009331.hg.1 | 3.211867029 | 2.472534784 |
| temira        | TC0100014960.hg.1 | 3.20560093  | 2.472534784 |
| folar         | TC0900008027.hg.1 | 3.187767883 | 3.845686185 |
| ---           | TC0300011888.hg.1 | 3.185650324 | 0.664908359 |
| RNU6-917P     | TC2000008163.hg.1 | 3.150359566 | 2.472534784 |
| SPRYD3        | TC1200010788.hg.1 | 3.128742476 | 0.664908359 |
| hosoyu        | TC0300011315.hg.1 | 3.123569398 | 2.472534784 |
| RP5-1014O16.9 | TC0X00008690.hg.1 | 3.123458078 | 0.664908359 |
| COL6A1        | TC2100007446.hg.1 | 3.115857309 | 0           |
| SLIT2         | TC0400007016.hg.1 | 3.115184441 | 0           |
| SAMD5         | TC0600014191.hg.1 | 3.11489655  | 1.607801004 |
| TFAP2C        | TC2000007830.hg.1 | 3.110193126 | 3.845686185 |
| EPHA4         | TC0200015815.hg.1 | 3.081912353 | 2.472534784 |

|                |                                     |             |             |
|----------------|-------------------------------------|-------------|-------------|
| loysawby       | TC0900008092.hg.1                   | 3.078983209 | 2.472534784 |
| LINC01234      | TC1200012000.hg.1                   | 3.070230384 | 0.263891671 |
| BACH2          | TC0600012554.hg.1                   | 3.068284834 | 0.407942629 |
| COBLL1         | TC0200014792.hg.1                   | 3.051547047 | 0.407942629 |
| DOCK11         | TC0X00008228.hg.1                   | 3.020750439 | 0.664908359 |
| LOC103344931   | TC1000008937.hg.1                   | 3.019641439 | 0.407942629 |
| morsey         | TC2100008045.hg.1                   | 3.018521687 | 0.263891671 |
| RP11-498C9.15  | TC1700012077.hg.1                   | 3.015244517 | 0.664908359 |
| ---            | TC1300008373.hg.1                   | 3.00777886  | 2.472534784 |
| FAM198B        | TC0400012245.hg.1                   | 2.999820479 | 2.472534784 |
| RP11-142E9.1   | TC1300006849.hg.1                   | 2.985878408 | 0.407942629 |
| IL31RA         | TC0500007432.hg.1                   | 2.980985794 | 3.845686185 |
| PITPNC1        | TC1700008690.hg.1                   | 2.977440304 | 0.664908359 |
| AC104405.1     | TC0200009380.hg.1                   | 2.96870382  | 0.664908359 |
| KCNK3          | TC0200007042.hg.1                   | 2.9604714   | 2.472534784 |
| TESPA1         | TC1200010850.hg.1                   | 2.959086254 | 1.607801004 |
| RP11-435B5.5   | TC14_GL000009v2_random00006453.hg.1 | 2.95596547  | 2.472534784 |
| bawbeybu       | TC0300012240.hg.1                   | 2.954531233 | 3.845686185 |
|                | HTA2-pos-PSR12027046.hg.1           | 2.951742934 | 2.472534784 |
| ---            | TC0500007242.hg.1                   | 2.935711098 | 2.472534784 |
| noyjo          | TC0600008635.hg.1                   | 2.927126307 | 0.263891671 |
| PLEKHG1        | TC0600009843.hg.1                   | 2.924721999 | 1.037101959 |
| ---            | TC1800009021.hg.1                   | 2.910787459 | 2.472534784 |
| ---            | TC0500010510.hg.1                   | 2.908320135 | 2.472534784 |
| CD33           | TC1900008633.hg.1                   | 2.906693931 | 3.845686185 |
| ---            | TC0200008189.hg.1                   | 2.905799009 | 3.845686185 |
| BX088702.2     | TC0900007312.hg.1                   | 2.899423017 | 2.472534784 |
| SLC8B1         | TC1200011993.hg.1                   | 2.898242877 | 0.263891671 |
| CFI            | TC0400011580.hg.1                   | 2.894328987 | 1.037101959 |
| TBC1D2         | TC0900010971.hg.1                   | 2.891011137 | 2.472534784 |
| shafarby       | TC1300008944.hg.1                   | 2.888952533 | 2.472534784 |
| CTD-2066L21.2  | TC0500010446.hg.1                   | 2.888633824 | 1.607801004 |
| NRP2           | TC0200010545.hg.1                   | 2.885496338 | 1.607801004 |
| ---            | TC1000008721.hg.1                   | 2.871993864 | 0.407942629 |
| LRRC6          | TC0800011861.hg.1                   | 2.870299602 | 2.472534784 |
| kykerbu        | TC0300013152.hg.1                   | 2.868101671 | 1.607801004 |
| CPQ            | TC0800008300.hg.1                   | 2.847823036 | 0           |
| RP11-435B5.3   | TC14_GL000009v2_random00006452.hg.1 | 2.844999864 | 2.472534784 |
| GLI3           | TC0700010857.hg.1                   | 2.83996208  | 2.472534784 |
| ADTRP          | TC0600010825.hg.1                   | 2.839546263 | 3.845686185 |
| RP5-1014O16.10 | TC0X00008691.hg.1                   | 2.837809345 | 0.664908359 |

|               |                         |             |             |
|---------------|-------------------------|-------------|-------------|
| ZMIZ1         | TC1000008182.hg.1       | 2.821328685 | 0.263891671 |
| worko         | TC0700009727.hg.1       | 2.81615827  | 3.845686185 |
| RP4-673D20.5  | TC2000008166.hg.1       | 2.814201732 | 0.664908359 |
| ---           | TC2000008174.hg.1       | 2.796391943 | 0.263891671 |
| MYLK          | TC0300012212.hg.1       | 2.792176873 | 1.607801004 |
| GRIN2D        | TC1900008470.hg.1       | 2.767287589 | 0.664908359 |
| flobler       | TC0700012620.hg.1       | 2.767047673 | 2.472534784 |
| ---           | TC2000009353.hg.1       | 2.753003448 | 0.407942629 |
| SNX10         | TC0700006984.hg.1       | 2.752845387 | 0.407942629 |
| SPATA6        | TC0100014127.hg.1       | 2.750618549 | 3.845686185 |
| SCG5          | TSUnmapped00000663.hg.1 | 2.750407245 | 2.472534784 |
| PROS1         | TC0300011757.hg.1       | 2.748367637 | 1.037101959 |
| GLIPR1        | TC1200008224.hg.1       | 2.734878359 | 0.664908359 |
| NAV2          | TC1100007030.hg.1       | 2.734093031 | 1.607801004 |
| ALMS1         | TC0200008047.hg.1       | 2.733537499 | 0.664908359 |
| HTN3          | TC0400007771.hg.1       | 2.731328489 | 0.263891671 |
|               | HTA2-pos-3374470_st     | 2.730553802 | 0.664908359 |
| shukubu       | TC0200007764.hg.1       | 2.729197248 | 1.607801004 |
| CTD-2044J15.2 | TC0500013151.hg.1       | 2.716753806 | 0           |
| VPS37B        | TC1200012254.hg.1       | 2.711339616 | 0.664908359 |
| GPR176        | TC1500010854.hg.1       | 2.71132098  | 2.472534784 |
| klawbley      | TC0600012558.hg.1       | 2.70049601  | 1.607801004 |
| blawzeybu     | TC1500009749.hg.1       | 2.698414233 | 0.263891671 |
| SLC37A2       | TC1100009408.hg.1       | 2.691633533 | 2.472534784 |
| ---           | TC1500007312.hg.1       | 2.690938495 | 0.407942629 |
| roharu        | TC0X00007947.hg.1       | 2.678491096 | 3.845686185 |
| RP11-341D18.6 | TC1300006434.hg.1       | 2.677779034 | 2.472534784 |
| APCDD1L       | TC2000009624.hg.1       | 2.677555538 | 2.472534784 |
| meysma        | TC1700008664.hg.1       | 2.672905811 | 2.472534784 |
| TMOD1         | TC0900008150.hg.1       | 2.672898863 | 3.845686185 |
| CD163L1       | TC1200012748.hg.1       | 2.672752194 | 2.472534784 |
| RP4-607J23.2  | TC0700013407.hg.1       | 2.667343882 | 1.037101959 |
| RP11-265D17.2 | TC1100010131.hg.1       | 2.66516989  | 2.472534784 |
| CENPP         | TC0900007953.hg.1       | 2.664494921 | 0.263891671 |
| KIF24         | TC0900009892.hg.1       | 2.660627118 | 0.263891671 |
| MUC7          | TC0400007782.hg.1       | 2.649701176 | 0.407942629 |
| CCDC15        | TC1100009407.hg.1       | 2.642913577 | 0           |
| TMEM164       | TC0X00008108.hg.1       | 2.636878322 | 2.472534784 |
| TMEM71        | TC0800012470.hg.1       | 2.630788314 | 0.664908359 |
| PLEC          | TC0800012176.hg.1       | 2.629571089 | 1.607801004 |
| LIG1          | TC1900011060.hg.1       | 2.62118346  | 0.263891671 |

|                   |                           |             |             |
|-------------------|---------------------------|-------------|-------------|
| KLHL21            | TC0100012690.hg.1         | 2.61320807  | 2.472534784 |
| DUSP5             | TC1000008891.hg.1         | 2.609368894 | 0.263891671 |
| ARHGAP22          | TC1000010575.hg.1         | 2.60878325  | 0.664908359 |
| sarstorbu         | TC0500012777.hg.1         | 2.608688167 | 2.472534784 |
| RNF152            | TC1800009306.hg.1         | 2.607527106 | 0.664908359 |
| POPDC3            | TC0600012709.hg.1         | 2.603757338 | 0.263891671 |
| sharglee          | TC0300007402.hg.1         | 2.602607191 | 0.664908359 |
| FAM129A           | TC0100016678.hg.1         | 2.600078174 | 0.664908359 |
| CTC-480C2.1       | TC0500007995.hg.1         | 2.595506619 | 0.407942629 |
| jyslar            | TC1700007395.hg.1         | 2.586950591 | 1.037101959 |
| RP5-1180D12.1     | TC1200009650.hg.1         | 2.585907196 | 0           |
| roply             | TC0100015888.hg.1         | 2.585496467 | 2.472534784 |
| ---               | TC1700008871.hg.1         | 2.581055207 | 0.407942629 |
| bP-21264C1.1      | TC2100007543.hg.1         | 2.577392787 | 3.845686185 |
| RP11-763B22.11    | TC0100009717.hg.1         | 2.574159443 | 0.407942629 |
| DOCK10            | TC0200015893.hg.1         | 2.573870259 | 0.263891671 |
| HIST1H1D          | TC0600011138.hg.1         | 2.573516145 | 1.037101959 |
| NFIX              | TC1900007115.hg.1         | 2.57309698  | 0.407942629 |
| RP11-588H23.3     | TC1200008166.hg.1         | 2.571555428 | 2.472534784 |
|                   | HTA2-pos-PSR12027058.hg.1 | 2.568719306 | 1.037101959 |
| FAM26E            | TC0600009234.hg.1         | 2.564817635 | 1.607801004 |
| RP11-350F4.2      | TC1200012786.hg.1         | 2.562338068 | 1.037101959 |
| FZD1              | TC0700008306.hg.1         | 2.553341785 | 0.664908359 |
| P2RY2             | TC1100008378.hg.1         | 2.552079168 | 1.037101959 |
| AC004067.5        | TC0400008382.hg.1         | 2.537162194 | 3.845686185 |
|                   | HTA2-pos-3374486_st       | 2.536612829 | 0.263891671 |
| bordarbu          | TC0300009037.hg.1         | 2.534599411 | 3.845686185 |
| TLN1              | TC0900009950.hg.1         | 2.534382303 | 1.037101959 |
| TCONS_l2_00002184 | TC0100015525.hg.1         | 2.534225962 | 1.607801004 |
| ---               | TC1800009282.hg.1         | 2.531823937 | 3.845686185 |
| doysaw            | TC1800008660.hg.1         | 2.517003839 | 2.472534784 |
| DLG5              | TC1000011130.hg.1         | 2.516792017 | 0.664908359 |
| JUN               | TC0100014349.hg.1         | 2.515966129 | 0.664908359 |
| ST3GAL1           | TC0800011887.hg.1         | 2.514758453 | 2.472534784 |
| MAGEA11           | TC0X00008689.hg.1         | 2.510897988 | 1.037101959 |
|                   | HTA2-pos-3581365_st       | 2.50814673  | 1.037101959 |
| PCNT              | TC2100007465.hg.1         | 2.50778978  | 1.037101959 |
| shuso             | TC1500009274.hg.1         | 2.50013688  | 3.845686185 |
| HOMER2            | TC1500010251.hg.1         | 2.49540532  | 1.607801004 |
| HECW2             | TC0200015318.hg.1         | 2.494834158 | 1.607801004 |
| tisomi            | TC1100008439.hg.1         | 2.491480444 | 1.037101959 |

|           |                           |             |             |
|-----------|---------------------------|-------------|-------------|
| yanemi    | TC1200010517.hg.1         | 2.490404347 | 1.037101959 |
| POF1B     | TC0X00010207.hg.1         | 2.489043453 | 0           |
| ---       | TC1700007611.hg.1         | 2.488841173 | 2.472534784 |
| TPTE      | TC2100008487.hg.1         | 2.48674214  | 2.472534784 |
| TTC39C    | TC1800006902.hg.1         | 2.477682941 | 0.664908359 |
| HIST1H3A  | TC0600007262.hg.1         | 2.471151138 | 2.472534784 |
| PTPRG-AS1 | TC0300011360.hg.1         | 2.469533005 | 1.037101959 |
|           | HTA2-pos-PSR12027045.hg.1 | 2.459785476 | 0.263891671 |
| HMG5      | TC0X00010172.hg.1         | 2.458818367 | 0.664908359 |
| SSX8      | TC0X00007292.hg.1         | 2.458020731 | 1.037101959 |
|           | HTA2-pos-PSR12027032.hg.1 | 2.457615409 | 1.037101959 |
| deebloy   | TC0600011586.hg.1         | 2.45677928  | 1.037101959 |
| HIST1H4I  | TC0600014084.hg.1         | 2.450674708 | 2.472534784 |
| moyrey    | TC1700011621.hg.1         | 2.450515746 | 1.037101959 |
| RAPH1     | TC0200015476.hg.1         | 2.449002364 | 3.845686185 |
| MCOLN3    | TC0100014769.hg.1         | 2.447356466 | 1.607801004 |
| TMEM117   | TC1200007408.hg.1         | 2.447310381 | 0           |
| SETBP1    | TC1800007186.hg.1         | 2.444351905 | 0.664908359 |
| TGOLN2    | TC0200008244.hg.1         | 2.440704551 | 0.407942629 |
| TCHP      | TC1200012704.hg.1         | 2.435775917 | 0.407942629 |
| ABLIM1    | TC1000011904.hg.1         | 2.429371852 | 1.607801004 |
| EPHX4     | TC0100009030.hg.1         | 2.427550262 | 2.472534784 |
| klyvoy    | TC1900010820.hg.1         | 2.423335102 | 2.472534784 |
| fuklarbu  | TC1000008316.hg.1         | 2.421795142 | 3.845686185 |
| HLA-DPA1  | TC0600011517.hg.1         | 2.420802138 | 0.664908359 |
| smeeleeby | TC0700007276.hg.1         | 2.418403826 | 0.664908359 |
| RPGR      | TC0X00009387.hg.1         | 2.417403975 | 0.263891671 |
| worklor   | TC0100007300.hg.1         | 2.416640712 | 2.472534784 |
| STRIP2    | TC0700009089.hg.1         | 2.416245563 | 0.263891671 |
| PDE4DIP   | TC0100009837.hg.1         | 2.414403273 | 1.037101959 |
| ---       | TC0200013160.hg.1         | 2.411669705 | 3.845686185 |
| IL4R      | TC1600007312.hg.1         | 2.400136156 | 0.407942629 |
| RFX8      | TC0200013669.hg.1         | 2.397950287 | 0.664908359 |
| OAF       | TC1100009279.hg.1         | 2.394914801 | 2.472534784 |
| MAGEA6    | TC0X00011136.hg.1         | 2.391169527 | 1.037101959 |
| CIT       | TC1200012143.hg.1         | 2.389368163 | 3.845686185 |
| CNTNAP1   | TC1700007910.hg.1         | 2.387002648 | 2.472534784 |
| PMP22     | TC1700009850.hg.1         | 2.386967903 | 2.472534784 |
| B4GALT6   | TC1800008399.hg.1         | 2.384879571 | 0.263891671 |
| SNAI2     | TC0800010382.hg.1         | 2.384711928 | 0.407942629 |
| PLGRKT    | TC0900009461.hg.1         | 2.380384975 | 1.607801004 |

|              |                           |             |             |
|--------------|---------------------------|-------------|-------------|
| CAMK2N2      | TC0300013381.hg.1         | 2.378263526 | 1.037101959 |
| RP11-20B7.1  | TC0300007852.hg.1         | 2.375454517 | 0.664908359 |
| RP3-460G2.2  | TC0600013384.hg.1         | 2.372514109 | 1.607801004 |
| SSXP5        | TC0X00007295.hg.1         | 2.366648719 | 1.037101959 |
| AKAP2        | TC0900012157.hg.1         | 2.366020379 | 1.037101959 |
| ---          | TC1600010014.hg.1         | 2.364252846 | 0.664908359 |
| TRPS1        | TC0800011532.hg.1         | 2.360926562 | 1.037101959 |
| ---          | TC1000012479.hg.1         | 2.359413586 | 0.263891671 |
| ANKRD44      | TC0200015336.hg.1         | 2.358572039 | 0.263891671 |
| OXCT1        | TC0500010599.hg.1         | 2.358196874 | 0           |
| LEF1         | TC0400011548.hg.1         | 2.356638955 | 1.607801004 |
| CRACR2A      | TC1200009649.hg.1         | 2.351449339 | 0.407942629 |
| LAPTM5       | TC0100013534.hg.1         | 2.351031985 | 0.263891671 |
| zerflorbu    | TC1100010525.hg.1         | 2.350837934 | 3.845686185 |
| FGD1         | TC0X00009780.hg.1         | 2.349768561 | 1.607801004 |
| PHLPP1       | TC1800007523.hg.1         | 2.348762218 | 1.037101959 |
| SEMA3A       | TC0700013578.hg.1         | 2.348164262 | 3.845686185 |
| TGOLN2       | TC0200013257.hg.1         | 2.346462656 | 0.263891671 |
| HIST1H3D     | TC0600011135.hg.1         | 2.343255334 | 1.607801004 |
| LINC01317    | TC0200016426.hg.1         | 2.340537965 | 3.845686185 |
| EFNB1        | TC0X00007507.hg.1         | 2.340221766 | 2.472534784 |
| ZNF185       | TC0X00008760.hg.1         | 2.335543528 | 3.845686185 |
|              | HTA2-pos-PSR12027039.hg.1 | 2.335357365 | 0.407942629 |
| RASAL2       | TC0100010735.hg.1         | 2.335229218 | 1.037101959 |
| DOCK4        | TC0700012276.hg.1         | 2.332603075 | 0.664908359 |
|              | HTA2-pos-PSR12027056.hg.1 | 2.332321493 | 1.607801004 |
| ---          | TC0300007626.hg.1         | 2.331760585 | 2.472534784 |
| ECM1         | TC0100009908.hg.1         | 2.319417851 | 3.845686185 |
| RP11-529P9.1 | TC0300011796.hg.1         | 2.319217702 | 2.472534784 |
| GOLGA7B      | TC1000008591.hg.1         | 2.315499721 | 1.607801004 |
| pawzerbu     | TC1500009510.hg.1         | 2.295344184 | 3.845686185 |
| LINC00997    | TC0700007126.hg.1         | 2.294858977 | 1.037101959 |
| CD109        | TC0600008539.hg.1         | 2.294521513 | 3.845686185 |
| GHC-362H12.3 | TC0X00008022.hg.1         | 2.294026542 | 0           |
| ---          | TC0100014532.hg.1         | 2.29028055  | 2.472534784 |
| RUSC2        | TC0900007082.hg.1         | 2.288429742 | 0.263891671 |
| LOC729987    | TC0100009172.hg.1         | 2.286761648 | 2.472534784 |
| DIP2C        | TC1000009516.hg.1         | 2.286088756 | 1.607801004 |
| GABPB2       | TC0100009939.hg.1         | 2.285982987 | 0.263891671 |
| peelaby      | TC1100010399.hg.1         | 2.284981656 | 1.607801004 |
| peynoy       | TC1300007941.hg.1         | 2.283498222 | 2.472534784 |

|               |                   |             |             |
|---------------|-------------------|-------------|-------------|
| gluber        | TC0Y00006480.hg.1 | 2.282783436 | 0.407942629 |
| ARPC1B        | TC0700013420.hg.1 | 2.280555057 | 0.263891671 |
| RTTN          | TC1800008978.hg.1 | 2.276884196 | 2.472534784 |
| wajey         | TC0600012149.hg.1 | 2.275735544 | 2.472534784 |
| AMOTL1        | TC1100013084.hg.1 | 2.274696656 | 1.037101959 |
| CH17-262O2.2  | TC0100009736.hg.1 | 2.261343257 | 3.845686185 |
| STARD13       | TC1300008573.hg.1 | 2.260717933 | 2.472534784 |
| DNAJC9        | TC1000012564.hg.1 | 2.257068181 | 0.407942629 |
| slarskerby    | TC0700008758.hg.1 | 2.252664559 | 2.472534784 |
| ANKRD20A17P   | TC0400010664.hg.1 | 2.249139793 | 2.472534784 |
| SPIN4         | TC0X00009867.hg.1 | 2.245951074 | 0.407942629 |
| TCF19         | TC0600007565.hg.1 | 2.239250353 | 1.607801004 |
| LOC102723833  | TC0100011597.hg.1 | 2.237951467 | 1.607801004 |
| ---           | TC0100018501.hg.1 | 2.229070248 | 2.472534784 |
| HIST2H3A      | TC0100015701.hg.1 | 2.228183939 | 1.037101959 |
| HIST2H3A      | TC0100009877.hg.1 | 2.219132535 | 0.407942629 |
| ATP6V1D       | TC1400010759.hg.1 | 2.218583214 | 2.472534784 |
| zarvo         | TC1400008679.hg.1 | 2.21819034  | 1.037101959 |
| ---           | TC2200007130.hg.1 | 2.208897284 | 2.472534784 |
| LOC653513     | TC0100015685.hg.1 | 2.206684053 | 2.472534784 |
| FAM225A       | TC0900008481.hg.1 | 2.205574766 | 3.845686185 |
| SLC26A2       | TC0500009076.hg.1 | 2.205415013 | 3.845686185 |
| CTD-3064C13.1 | TC1100010338.hg.1 | 2.204876603 | 2.472534784 |
| RBL1          | TC2000009026.hg.1 | 2.204435349 | 0.407942629 |
| CTD-2313J17.5 | TC1500010495.hg.1 | 2.197786381 | 2.472534784 |
| ZHX3          | TC2000009128.hg.1 | 2.192891097 | 1.037101959 |
| ---           | TC0400007470.hg.1 | 2.183130441 | 3.845686185 |
| zerby         | TC0100007345.hg.1 | 2.176397762 | 1.037101959 |
| DDIT3         | TC1200010968.hg.1 | 2.176007833 | 1.607801004 |
| CTD-3099C6.9  | TC1900011310.hg.1 | 2.170408596 | 3.845686185 |
| BRCA1         | TC1700010763.hg.1 | 2.166951204 | 1.607801004 |
| POTEJ         | TC0200009312.hg.1 | 2.150843045 | 1.607801004 |
| parstarby     | TC1100008442.hg.1 | 2.149437757 | 0.407942629 |
| EFNB2         | TC1300009712.hg.1 | 2.146761123 | 0.263891671 |
| HIST1H2AE     | TC0600007285.hg.1 | 2.145656551 | 1.607801004 |
| SACS          | TC1300008329.hg.1 | 2.144458405 | 1.037101959 |
| DEPDC7        | TC1100007220.hg.1 | 2.1409287   | 1.607801004 |
| jozuby        | TC0800012069.hg.1 | 2.139810814 | 0.263891671 |
| LCP1          | TC1300008840.hg.1 | 2.131789517 | 0.263891671 |
| KRTAP1-5      | TC1700010648.hg.1 | 2.125943983 | 3.845686185 |
| SKA1          | TC1800007316.hg.1 | 2.1245368   | 1.607801004 |

|               |                           |             |             |
|---------------|---------------------------|-------------|-------------|
| IDS           | TC0X00011404.hg.1         | 2.121445329 | 3.845686185 |
| TNRC6C        | TC1700009032.hg.1         | 2.120039654 | 3.845686185 |
|               | HTA2-pos-3374481_st       | 2.118227434 | 1.607801004 |
| CPS1          | TC0200010658.hg.1         | 2.113527426 | 1.607801004 |
| INCENP        | TC1100007833.hg.1         | 2.105822982 | 0.664908359 |
| ACSL5         | TC1000008926.hg.1         | 2.102203743 | 2.472534784 |
| FBN1          | TC1500009348.hg.1         | 2.101608829 | 3.845686185 |
|               | HTA2-pos-PSR12027052.hg.1 | 2.101078406 | 2.472534784 |
| FBXO5         | TC0600013602.hg.1         | 2.09993669  | 2.472534784 |
| ---           | TC0400012955.hg.1         | 2.091911642 | 3.845686185 |
|               | HTA2-pos-PSR12027049.hg.1 | 2.08596748  | 1.037101959 |
| HIST1H4D      | TC0600011134.hg.1         | 2.085785548 | 3.845686185 |
| ---           | TC1200011331.hg.1         | 2.083568936 | 2.472534784 |
| NRP1          | TC1000010273.hg.1         | 2.081530936 | 0.664908359 |
| SVIP          | TC1100010349.hg.1         | 2.069966496 | 1.607801004 |
| PBX3          | TC0900008763.hg.1         | 2.069629467 | 1.037101959 |
|               | HTA2-pos-PSR12027031.hg.1 | 2.069349747 | 1.607801004 |
|               | HTA2-pos-PSR12027054.hg.1 | 2.068798786 | 1.607801004 |
| IL1RAP        | TC0300009855.hg.1         | 2.067607728 | 3.845686185 |
| KDSR          | TC1800008903.hg.1         | 2.066737269 | 1.037101959 |
| CEP290        | TC1200011454.hg.1         | 2.063969521 | 1.037101959 |
| RP11-819C21.1 | TC1100012207.hg.1         | 2.062917558 | 0.664908359 |
|               | HTA2-pos-PSR12027042.hg.1 | 2.060266312 | 2.472534784 |
| RAD51L3-RFFL  | TC1700012384.hg.1         | 2.059824729 | 3.845686185 |
| KLF14         | TC0700012609.hg.1         | 2.058734683 | 2.472534784 |
| SMC5          | TC0900007520.hg.1         | 2.05847011  | 0.263891671 |
| ---           | TC0200014300.hg.1         | 2.055086449 | 2.472534784 |
| CLSPN         | TC0100013700.hg.1         | 2.051071095 | 0.664908359 |
| LHFP          | TC1300008668.hg.1         | 2.050458673 | 1.607801004 |
| ASNS          | TC0700011876.hg.1         | 2.049009491 | 1.037101959 |
| RAD18         | TC0300010186.hg.1         | 2.047043367 | 1.037101959 |
|               | HTA2-pos-3374472_st       | 2.045016523 | 2.472534784 |
|               | HTA2-pos-PSR12027037.hg.1 | 2.042351122 | 1.037101959 |
| CCNE2         | TC0800011148.hg.1         | 2.03762938  | 0.263891671 |
| IGF2R         | TC0600010066.hg.1         | 2.034529219 | 1.607801004 |
| PXDC1         | TC0600010609.hg.1         | 2.033450681 | 1.607801004 |
| KIF15         | TSUnmapped00000627.hg.1   | 2.032164936 | 2.472534784 |
| ---           | TC0600008564.hg.1         | 2.030772671 | 3.845686185 |
| ---           | TC0500011774.hg.1         | 2.030597077 | 2.472534784 |
| SRGAP1        | TC1200007992.hg.1         | 2.028862133 | 2.472534784 |
| SMAGP         | TC1200010702.hg.1         | 2.020777994 | 2.472534784 |



|            |                           |             |             |
|------------|---------------------------|-------------|-------------|
| MICAL2     | TC1100012966.hg.1         | 2.020347325 | 1.607801004 |
| HIST1H1B   | TC0600011232.hg.1         | 2.013213253 | 2.472534784 |
| DSE        | TC0600014177.hg.1         | 2.010910794 | 1.037101959 |
| LMBRD2     | TC0500010493.hg.1         | 2.006868147 | 0.407942629 |
| kuchoybu   | TC0700010064.hg.1         | 2.001569207 | 2.472534784 |
| ECE1       | TC0100013205.hg.1         | 1.994669882 | 0.263891671 |
| TRIP13     | TC0500006472.hg.1         | 1.991707559 | 2.472534784 |
|            | HTA2-pos-3374446_st       | 1.989758492 | 3.845686185 |
| sugyby     | TC1100006732.hg.1         | 1.986699032 | 1.607801004 |
| HIST1H2BE  | TC0600007278.hg.1         | 1.982445447 | 1.037101959 |
| CAD        | TC0200007059.hg.1         | 1.981570208 | 1.607801004 |
|            | HTA2-pos-PSR12027030.hg.1 | 1.978979498 | 2.472534784 |
| dywer      | TC1700010410.hg.1         | 1.978824728 | 2.472534784 |
| C3orf14    | TC0300007657.hg.1         | 1.978574881 | 1.037101959 |
| KATNAL1    | TC1300008511.hg.1         | 1.977070294 | 3.845686185 |
| KIF11      | TC1000008471.hg.1         | 1.975372868 | 1.037101959 |
| FBXL13     | TC0700012111.hg.1         | 1.974173906 | 3.845686185 |
| ---        | TC0600010925.hg.1         | 1.973511259 | 2.472534784 |
| ANAPC5     | TC1200012202.hg.1         | 1.968302101 | 2.472534784 |
|            | HTA2-pos-PSR11008181.hg.1 | 1.967141631 | 3.845686185 |
| PRR12      | TC1900008547.hg.1         | 1.966732618 | 2.472534784 |
| FAM172BP   | TC0300008170.hg.1         | 1.965284033 | 3.845686185 |
| FHOD3      | TC1800007096.hg.1         | 1.959362386 | 1.607801004 |
| ---        | TC2000007629.hg.1         | 1.955045251 | 3.845686185 |
| ---        | TC0700012196.hg.1         | 1.953411198 | 3.845686185 |
| TRAM2      | TC0600012040.hg.1         | 1.952441289 | 2.472534784 |
| ---        | TC0500012872.hg.1         | 1.951209697 | 2.472534784 |
| RANBP17    | TC0500009411.hg.1         | 1.949459253 | 3.845686185 |
| shaforbo   | TC0300007403.hg.1         | 1.948476232 | 1.037101959 |
|            | HTA2-pos-PSR12027047.hg.1 | 1.944942494 | 2.472534784 |
| WNT7B      | TC2200008995.hg.1         | 1.943483577 | 3.845686185 |
| BCL2       | TC1800008891.hg.1         | 1.942874101 | 0.664908359 |
| ARHGAP19   | TC1000012580.hg.1         | 1.938757685 | 1.607801004 |
| AP001350.4 | TC1100007711.hg.1         | 1.938651188 | 0.664908359 |
| TSPAN4     | TC1100006495.hg.1         | 1.93859643  | 1.607801004 |
| ---        | TC0900008537.hg.1         | 1.937475857 | 1.607801004 |
| UGT8       | TC0400008483.hg.1         | 1.936051729 | 3.845686185 |
| storglar   | TC1200011774.hg.1         | 1.933738439 | 1.607801004 |
| ---        | TC1900007532.hg.1         | 1.933344747 | 1.607801004 |
| AHNAK      | TC1100011083.hg.1         | 1.932824749 | 3.845686185 |
| RAD1       | TC0500010476.hg.1         | 1.932019515 | 3.845686185 |

|              |                           |             |             |
|--------------|---------------------------|-------------|-------------|
|              | HTA2-pos-PSR12027048.hg.1 | 1.928908889 | 3.845686185 |
| MAPK8        | TC1000007564.hg.1         | 1.926193314 | 2.472534784 |
| KIFC1        | TC0600007700.hg.1         | 1.924804161 | 2.472534784 |
| TUBGCP3      | TC1300009856.hg.1         | 1.924433519 | 3.845686185 |
|              | HTA2-pos-3374465_st       | 1.923309357 | 2.472534784 |
| MAGEA3       | TC0X00008750.hg.1         | 1.92101096  | 0.407942629 |
| NUP155       | TC0500010515.hg.1         | 1.917308514 | 3.845686185 |
| AGAP1        | TC0200011188.hg.1         | 1.915596671 | 1.607801004 |
| ADNP2        | TC1800007835.hg.1         | 1.914490941 | 2.472534784 |
| ZNF131       | TC0500013166.hg.1         | 1.914122837 | 2.472534784 |
| MED10        | TC0500009987.hg.1         | 1.912183311 | 2.472534784 |
|              | HTA2-pos-3374499_st       | 1.912001074 | 1.037101959 |
| RAD51D       | TC1700012385.hg.1         | 1.911716487 | 2.472534784 |
| TMEM107      | TC1700009676.hg.1         | 1.907772203 | 3.845686185 |
| MMS22L       | TC0600012631.hg.1         | 1.907632588 | 1.607801004 |
| TULP4        | TC0600014198.hg.1         | 1.902370612 | 3.845686185 |
| veespee      | TC0900006546.hg.1         | 1.900217312 | 2.472534784 |
| SLC43A3      | TC1100013165.hg.1         | 1.896032026 | 2.472534784 |
| RAB36        | TC2200006832.hg.1         | 1.881972004 | 2.472534784 |
| ---          | TC0100011486.hg.1         | 1.879212654 | 2.472534784 |
|              | HTA2-pos-PSR12025171.hg.1 | 1.878117403 | 0.664908359 |
| RP11-435D7.3 | TC0100007783.hg.1         | 1.877699785 | 3.845686185 |
| blofarbo     | TC0300010768.hg.1         | 1.877320971 | 2.472534784 |
| ---          | TC1800008683.hg.1         | 1.876031649 | 3.845686185 |
|              | HTA2-pos-PSR12027034.hg.1 | 1.862023998 | 3.845686185 |
| ---          | TC0500012449.hg.1         | 1.860526793 | 3.845686185 |
| SETD1B       | TC1200009183.hg.1         | 1.857362827 | 3.845686185 |
| PRIM1        | TC1200012804.hg.1         | 1.856068557 | 2.472534784 |
| VSIG10       | TC1200012855.hg.1         | 1.853101409 | 2.472534784 |
| DNAJC21      | TC0500007123.hg.1         | 1.852955627 | 2.472534784 |
| POLA1        | TC0X00006823.hg.1         | 1.852187304 | 2.472534784 |
| EZH2         | TC0700012959.hg.1         | 1.849177012 | 3.845686185 |
| SUSD6        | TC1400007558.hg.1         | 1.849163875 | 2.472534784 |
| BACH1        | TC2100008490.hg.1         | 1.843995327 | 3.845686185 |
| RP11-414B7.1 | TC0100009288.hg.1         | 1.842108132 | 2.472534784 |
| FN1          | TC0200015650.hg.1         | 1.836781479 | 1.607801004 |
|              | HTA2-pos-PSR12027036.hg.1 | 1.83283151  | 2.472534784 |
| RAB35        | TC1200012145.hg.1         | 1.812985642 | 1.607801004 |
| kuyore       | TC1000011733.hg.1         | 1.810764381 | 2.472534784 |
| roseebu      | TC1900010700.hg.1         | 1.806426535 | 2.472534784 |
|              | HTA2-pos-PSR12027040.hg.1 | 1.796466044 | 2.472534784 |

|                               |                           |                    |                    |
|-------------------------------|---------------------------|--------------------|--------------------|
| CCL28                         | TC0500010639.hg.1         | 1.792562494        | 3.845686185        |
| KIF20B                        | TC1000008406.hg.1         | 1.784859896        | 1.037101959        |
| ---                           | TC1300008995.hg.1         | 1.778787186        | 2.472534784        |
| RRM2                          | TC0200006677.hg.1         | 1.776729639        | 2.472534784        |
| ANTXR1                        | TC0200007908.hg.1         | 1.774297997        | 2.472534784        |
| CCND1                         | TC1100008236.hg.1         | 1.768929642        | 3.845686185        |
| ATAD5                         | TC1700007469.hg.1         | 1.767261872        | 3.845686185        |
| NOTCH2NL                      | TC0100018479.hg.1         | 1.761358199        | 3.845686185        |
| TCTN2                         | TC1200009252.hg.1         | 1.752156532        | 3.845686185        |
| JMJD1C                        | TC1000012561.hg.1         | 1.746465729        | 1.607801004        |
| ARHGAP19-SLIT1                | TC1000012581.hg.1         | 1.744593396        | 3.845686185        |
| EIF5A2                        | TC0300013104.hg.1         | 1.737414119        | 2.472534784        |
| MED13L                        | TC1200012043.hg.1         | 1.736518162        | 3.845686185        |
| FRMD4A                        | TC1000009851.hg.1         | 1.730497271        | 2.472534784        |
| RPSAP52                       | TC1200011119.hg.1         | 1.721942239        | 3.845686185        |
| CDC48                         | TC0100007841.hg.1         | 1.710639589        | 2.472534784        |
| DNMT1                         | TC1900011860.hg.1         | 1.709049481        | 3.845686185        |
|                               | HTA2-pos-PSR12025172.hg.1 | 1.704366775        | 3.845686185        |
| PEA15                         | TC0100010284.hg.1         | 1.700532604        | 3.845686185        |
| HIST1H1C                      | TC0600011127.hg.1         | 1.69408156         | 3.845686185        |
| TXNRD1                        | TC1200008675.hg.1         | 1.693907389        | 2.472534784        |
| CDK1                          | TC1000007748.hg.1         | 1.690754859        | 2.472534784        |
|                               | HTA2-pos-3374474_st       | 1.689575516        | 3.845686185        |
| ---                           | TC0100008116.hg.1         | 1.686804762        | 2.472534784        |
| RUFY2                         | TC1000010844.hg.1         | 1.682066799        | 2.472534784        |
| ITGA3                         | TC1700008228.hg.1         | 1.681604381        | 1.607801004        |
|                               | HTA2-pos-3374490_st       | 1.662398011        | 3.845686185        |
| RAD54L                        | TC0100008150.hg.1         | 1.654518779        | 2.472534784        |
| FJX1                          | TC1100007285.hg.1         | 1.636978076        | 2.472534784        |
| TOPBP1                        | TC0300012475.hg.1         | 1.579282396        | 3.845686185        |
|                               |                           |                    |                    |
|                               |                           |                    |                    |
| <b>Significant - negative</b> |                           |                    |                    |
| <b>Gene ID</b>                | <b>Prove ID</b>           | <b>Fold change</b> | <b>q-value (%)</b> |
| SLCO1B3                       | TC1200012601.hg.1         | -69.92123039       | 0                  |
| TMEM47                        | TC0X00009356.hg.1         | -50.62466906       | 0                  |
| ANXA10                        | TC0400009253.hg.1         | -39.52995296       | 0                  |
| IDO1                          | TC0800007382.hg.1         | -31.55153231       | 0                  |
| PAQR5                         | TC1500007695.hg.1         | -26.83219332       | 1.037101959        |
| FGFBP1                        | TC0400010125.hg.1         | -23.65590446       | 0                  |
| LYPD1                         | TC0200014361.hg.1         | -23.0266266        | 0                  |

|               |                   |              |             |
|---------------|-------------------|--------------|-------------|
| MPZL2         | TC1100012474.hg.1 | -22.44006837 | 0           |
| CDH6          | TC0500007044.hg.1 | -22.35399839 | 0           |
| PDGFRL        | TC0800006873.hg.1 | -18.39055992 | 0           |
| TMTC1         | TC1200010252.hg.1 | -17.60790974 | 0           |
| OASL          | TC1200012190.hg.1 | -17.4689259  | 0.333076753 |
| ZFH4-AS1      | TC0800012431.hg.1 | -17.23853179 | 0           |
| ---           | TC1900007609.hg.1 | -16.93573271 | 1.607801004 |
| CXCR4         | TC0200014414.hg.1 | -15.95089164 | 1.037101959 |
| SORBS2        | TC0400012644.hg.1 | -15.93295917 | 0           |
| PKP2          | TC1200010341.hg.1 | -15.58371723 | 0           |
| TNFSF10       | TC0300013146.hg.1 | -14.83042462 | 0           |
| GABRE         | TC0X00011121.hg.1 | -14.64944903 | 0           |
| RSAD2         | TC0200016402.hg.1 | -14.40578128 | 1.037101959 |
| FOXA1         | TC1400008981.hg.1 | -14.35617325 | 0           |
| LINC00470     | TC1800007879.hg.1 | -14.28743883 | 0           |
| RP11-283C24.1 | TC1700007241.hg.1 | -14.24839653 | 0           |
| OAS1          | TC1200012708.hg.1 | -13.87551262 | 0.333076753 |
| CCL5          | TC1700010447.hg.1 | -13.78859209 | 2.472534784 |
| NUP210        | TC0300010329.hg.1 | -13.66137777 | 0           |
| TM7SF2        | TC1100013040.hg.1 | -13.07662803 | 0           |
| CST1          | TC2000008682.hg.1 | -12.16275376 | 1.607801004 |
| CST4          | TC2000008680.hg.1 | -11.88012958 | 2.472534784 |
| DDX60         | TC0400012366.hg.1 | -11.67436628 | 0.333076753 |
| IFIT1         | TC1000008400.hg.1 | -11.54314279 | 0.664908359 |
| SCDP1         | TC1700007240.hg.1 | -11.33267211 | 0           |
| OCLN          | TC0500007681.hg.1 | -10.5117199  | 0           |
| LOC647859     | TC0500011056.hg.1 | -10.36686781 | 0           |
| AKR1C1        | TC1000012427.hg.1 | -10.35065504 | 0.407942629 |
| NPY1R         | TC0400012305.hg.1 | -10.2934795  | 0           |
| LOC101928161  | TC0200009393.hg.1 | -10.1967854  | 0.333076753 |
| TMEM171       | TC0500007761.hg.1 | -9.889337207 | 0           |
| CCNA1         | TC1300006879.hg.1 | -9.806756117 | 0.333076753 |
| HTR1D         | TC0100013272.hg.1 | -9.691857324 | 0           |
| CST2          | TC2000008684.hg.1 | -9.072157373 | 3.845686185 |
| DHCR7         | TC1100011514.hg.1 | -8.964402953 | 0           |
| RANBP3L       | TC0500010498.hg.1 | -8.832687174 | 0.333076753 |
| SLC38A4       | TC1200010531.hg.1 | -8.752308454 | 0.333076753 |
| MX1           | TC2100007208.hg.1 | -8.703204324 | 2.472534784 |
| DDIT4         | TC1000007990.hg.1 | -8.625730152 | 0.333076753 |
| INSIG1        | TC0700009807.hg.1 | -8.603069544 | 0           |
| RBPM52        | TC1500009756.hg.1 | -8.579926764 | 0           |

|               |                         |              |             |
|---------------|-------------------------|--------------|-------------|
| SCD           | TC1000008643.hg.1       | -8.456784213 | 0           |
| XAF1          | TC1700006709.hg.1       | -8.453903631 | 3.845686185 |
| TGFBI         | TC0500008736.hg.1       | -8.321996414 | 0           |
| RGS4          | TC0100010393.hg.1       | -8.264178028 | 1.607801004 |
| OLMALINC      | TC1000008646.hg.1       | -8.008167129 | 0           |
| IFIT2         | TC1000008396.hg.1       | -8.003220548 | 1.607801004 |
| GPR87         | TC0300012814.hg.1       | -7.789128488 | 0           |
| ADAM23        | TC0200010577.hg.1       | -7.760526323 | 0           |
| KRT17         | TC1700010682.hg.1       | -7.42517228  | 0.664908359 |
| GBP4          | TC0100014855.hg.1       | -7.370834677 | 0.333076753 |
| TIMP3         | TC2200007150.hg.1       | -7.36160751  | 2.472534784 |
| MVD           | TC1600011221.hg.1       | -7.301018151 | 0           |
| ITGB4         | TC1700008920.hg.1       | -7.178825933 | 0           |
| FDFT1         | TC0800006760.hg.1       | -7.067095967 | 0           |
| ---           | TC2200008523.hg.1       | -7.049016586 | 1.607801004 |
| TACSTD2       | TC0100014340.hg.1       | -7.043890587 | 0           |
| ANK1          | TC0800010252.hg.1       | -6.695224043 | 0.333076753 |
| SYT11         | TC0100010140.hg.1       | -6.415204847 | 0           |
| DUSP1         | TC0500012842.hg.1       | -6.341829832 | 0.333076753 |
| ---           | TC0100008970.hg.1       | -6.335505569 | 0           |
| OSBP2         | TC2200007069.hg.1       | -6.293468452 | 1.607801004 |
| RTP4          | TC0300009799.hg.1       | -6.284491068 | 0.407942629 |
| APOL2         | TC2200008592.hg.1       | -6.244807065 | 0           |
| RP11-811J10.1 | TC0500006916.hg.1       | -6.06889068  | 0           |
| RP11-811J10.1 | TSUnmapped00000773.hg.1 | -6.06889068  | 0           |
| IFIH1         | TC0200014772.hg.1       | -6.056615532 | 1.037101959 |
| OR7E14P       | TC1100006955.hg.1       | -6.052883149 | 0           |
| ---           | TC1000007548.hg.1       | -5.996523139 | 0           |
| HERC5         | TC0400008106.hg.1       | -5.968647971 | 0.664908359 |
| HMGCR         | TC0500007804.hg.1       | -5.92850838  | 0           |
| JUP           | TC1700010686.hg.1       | -5.863303894 | 0.333076753 |
| SCG2          | TC0200015865.hg.1       | -5.862866    | 1.037101959 |
| IFIT3         | TC1000008397.hg.1       | -5.762244324 | 1.607801004 |
| HSD17B7       | TC0100010389.hg.1       | -5.721994721 | 0.333076753 |
| ISG15         | TC0100006483.hg.1       | -5.680928518 | 3.845686185 |
| PNRC1         | TC0600008757.hg.1       | -5.63529382  | 0           |
| APOL1         | TC2200007242.hg.1       | -5.572810772 | 0           |
| LIMCH1        | TC0400007345.hg.1       | -5.559982466 | 0           |
| RP11-397D21.1 | TC0400008465.hg.1       | -5.532338124 | 0           |
| METTL7A       | TC1200007626.hg.1       | -5.525073538 | 0           |
| NR2F1         | TC0500008086.hg.1       | -5.503831617 | 0           |

|           |                   |              |             |
|-----------|-------------------|--------------|-------------|
| ---       | TC1000009537.hg.1 | -5.471043715 | 0           |
| PLPP4     | TC1000009104.hg.1 | -5.413353745 | 1.607801004 |
| EPCAM     | TC0200007506.hg.1 | -5.372738048 | 0           |
| PLBD1     | TC1200010006.hg.1 | -5.332262916 | 0.333076753 |
| CYFIP2    | TC0500009211.hg.1 | -5.227514227 | 0           |
| NIPSNAP1  | TC2200009336.hg.1 | -5.223236398 | 0           |
| IDI1      | TC1000009536.hg.1 | -5.201763591 | 0           |
| glupuby   | TC1000008644.hg.1 | -5.191289402 | 2.472534784 |
| CHCHD10   | TC2200008186.hg.1 | -5.178939362 | 0           |
| LOC647859 | TC0500011055.hg.1 | -5.070004988 | 1.037101959 |
| EYA2      | TC2000007545.hg.1 | -5.064909531 | 0           |
| KLHL13    | TC0X00010607.hg.1 | -5.048325732 | 0           |
| RARRES3   | TC1100007899.hg.1 | -5.041664675 | 0.333076753 |
| SLC4A11   | TC2000008217.hg.1 | -5.036308529 | 0           |
| PLAT      | TC0800010275.hg.1 | -4.966708237 | 0.664908359 |
| NRXN3     | TC1400007774.hg.1 | -4.933910914 | 0           |
| SQLE      | TC0800008783.hg.1 | -4.93137512  | 0           |
| TSPY26P   | TC2000008844.hg.1 | -4.925018862 | 0           |
| KRT17P1   | TC1700009911.hg.1 | -4.91380265  | 1.607801004 |
| GPRC5A    | TC1200006896.hg.1 | -4.913470861 | 0           |
| DDX58     | TC0900009825.hg.1 | -4.892798943 | 0.333076753 |
| SYNGR1    | TC2200007398.hg.1 | -4.810891736 | 0.333076753 |
| SCD5      | TC0400011180.hg.1 | -4.753833913 | 0           |
| SREBF1    | TC1700009949.hg.1 | -4.698510589 | 0           |
| CEACAM1   | TC1900010807.hg.1 | -4.673081397 | 3.845686185 |
| MSMO1     | TC0400009221.hg.1 | -4.666014638 | 0.333076753 |
| LPCAT2    | TC1600007931.hg.1 | -4.589308638 | 0           |
| MEST      | TC0700009145.hg.1 | -4.588190629 | 0.333076753 |
| C5orf46   | TC0500012394.hg.1 | -4.578173591 | 3.845686185 |
| C20orf96  | TC2000008121.hg.1 | -4.562112953 | 0.407942629 |
| NCKAP5    | TC0200014362.hg.1 | -4.524191771 | 0           |
| PCYOX1L   | TC0500009061.hg.1 | -4.482275264 | 0           |
| ERG       | TC2100008143.hg.1 | -4.481853785 | 0.333076753 |
| GABARAPL1 | TC1200006787.hg.1 | -4.476954533 | 0.407942629 |
| IRF9      | TC1400010584.hg.1 | -4.436178756 | 2.472534784 |
| RDH10     | TC0800007957.hg.1 | -4.434380802 | 0.664908359 |
| DEPTOR    | TC0800008674.hg.1 | -4.395966067 | 0.333076753 |
| ---       | TC0900008493.hg.1 | -4.376318788 | 0.407942629 |
| SLCO4A1   | TC2000008023.hg.1 | -4.341511785 | 0.407942629 |
| ITGB8     | TC0700006844.hg.1 | -4.251486922 | 0.333076753 |
| ADGRG6    | TC0600009669.hg.1 | -4.249182084 | 0.333076753 |

|              |                   |              |             |
|--------------|-------------------|--------------|-------------|
| GATA3        | TC1000006707.hg.1 | -4.222946588 | 0           |
| AKR1C3       | TC1000012428.hg.1 | -4.196899743 | 0           |
| SHISA2       | TC1300008400.hg.1 | -4.190845492 | 0           |
| ALDH3A1      | TC1700010036.hg.1 | -4.155556429 | 1.037101959 |
| SREBF2       | TC2200007495.hg.1 | -4.137435056 | 0           |
| HCFC1R1      | TC1600009162.hg.1 | -4.135059246 | 0           |
| DHX58        | TC1700010707.hg.1 | -4.126649527 | 2.472534784 |
| CYP51A1      | TC0700013584.hg.1 | -4.078395444 | 0           |
| SLC12A2      | TC0500008568.hg.1 | -4.072790202 | 0           |
| PPARG        | TC0300006622.hg.1 | -4.061874973 | 0           |
| RASSF2       | TC2000008267.hg.1 | -4.057536295 | 0           |
| FASN         | TC1700012093.hg.1 | -4.048301295 | 0           |
| FZD7         | TC0200010473.hg.1 | -4.02323358  | 0.664908359 |
| SMAD6        | TC1500007619.hg.1 | -4.014352346 | 0           |
| LOC105369364 | TC1100008206.hg.1 | -3.978748616 | 2.472534784 |
| ---          | TC2100007247.hg.1 | -3.953441746 | 0           |
| PTGS1        | TC0900008660.hg.1 | -3.934294398 | 0.333076753 |
| SNRPN        | TC1500010698.hg.1 | -3.926974782 | 0           |
| PAK3         | TC0X00008125.hg.1 | -3.880845726 | 0           |
| ACSL3        | TC0200010907.hg.1 | -3.865488734 | 0           |
| SLC29A2      | TC1100011286.hg.1 | -3.841819309 | 1.607801004 |
| HIGD2A       | TC0500009587.hg.1 | -3.836717831 | 0.333076753 |
| SPINT1       | TC1500006972.hg.1 | -3.82244833  | 0.333076753 |
| IGFBP3       | TC0700010965.hg.1 | -3.783321817 | 0.407942629 |
| RGCC         | TC1300006979.hg.1 | -3.755787443 | 3.845686185 |
| CHD7         | TC0800007774.hg.1 | -3.74480237  | 0.333076753 |
| RNA5S11      | TC0100017636.hg.1 | -3.740944338 | 2.472534784 |
| RNA5S12      | TC0100017637.hg.1 | -3.740944338 | 2.472534784 |
| RNA5S13      | TC0100017638.hg.1 | -3.740944338 | 2.472534784 |
| RNA5S14      | TC0100017639.hg.1 | -3.740944338 | 2.472534784 |
| RNA5S15      | TC0100017640.hg.1 | -3.740944338 | 2.472534784 |
| RNA5S16      | TC0100017641.hg.1 | -3.740944338 | 2.472534784 |
| SNORD116-2   | TC1500006574.hg.1 | -3.722180884 | 0           |
| AZIN2        | TC0100007705.hg.1 | -3.710948981 | 0.664908359 |
| LPIN1        | TC0200016403.hg.1 | -3.692614526 | 0           |
| LINC01356    | TC0100015307.hg.1 | -3.692469489 | 0.333076753 |
| HSD17B7P2    | TC1000007346.hg.1 | -3.678724364 | 1.607801004 |
| DUSP4        | TC0800010002.hg.1 | -3.670690984 | 1.037101959 |
| TSPAN1       | TC0100008145.hg.1 | -3.665051151 | 0.407942629 |
| FUZ          | TC1900012001.hg.1 | -3.647946319 | 0           |
| CIB2         | TC1500010134.hg.1 | -3.644203649 | 0.333076753 |

|               |                   |              |             |
|---------------|-------------------|--------------|-------------|
| IGFBP5        | TC0200015678.hg.1 | -3.626592759 | 1.607801004 |
| CYP51A1P2     | TC1300008470.hg.1 | -3.602580081 | 0           |
| TLE4          | TC0900007680.hg.1 | -3.588439672 | 0           |
| IRF1          | TC0500012017.hg.1 | -3.587959859 | 0.333076753 |
| C8orf4        | TC0800007389.hg.1 | -3.569941047 | 2.472534784 |
| PDE7B         | TC0600009545.hg.1 | -3.547904065 | 0.333076753 |
| MPI           | TC1500007860.hg.1 | -3.538020727 | 0           |
| CDK15         | TC0200010467.hg.1 | -3.537447532 | 1.037101959 |
| SLC7A2        | TC0800006869.hg.1 | -3.530219363 | 1.037101959 |
| SPRY1         | TC0400008628.hg.1 | -3.521909489 | 1.037101959 |
| AKR1C2        | TC1000012516.hg.1 | -3.512790813 | 0.664908359 |
| STARD4        | TC0500011702.hg.1 | -3.511909903 | 0           |
| TRIM69        | TC1500010731.hg.1 | -3.496170597 | 1.607801004 |
| ---           | TC0600011144.hg.1 | -3.488736573 | 2.472534784 |
| PGF           | TC1400009705.hg.1 | -3.482475412 | 0           |
| LOC101927571  | TC1800008264.hg.1 | -3.478920795 | 1.037101959 |
| PLEKHH1       | TC1400007495.hg.1 | -3.442776238 | 0           |
| PTPN13        | TC0400008041.hg.1 | -3.429747021 | 0           |
| RNA5SP149     | TC0300013282.hg.1 | -3.389191917 | 1.607801004 |
| SLC27A2       | TC1500007196.hg.1 | -3.388445538 | 2.472534784 |
| RNF122        | TC0800010081.hg.1 | -3.375607506 | 0.333076753 |
| TEKT4P2       | TC2100007534.hg.1 | -3.375156152 | 1.607801004 |
| RAB26         | TC1600006593.hg.1 | -3.3738005   | 0           |
| RDH11         | TC1400010765.hg.1 | -3.37321085  | 0           |
| RP11-463P17.1 | TC1000007547.hg.1 | -3.372313711 | 0.333076753 |
| HMGCS1        | TC0500010635.hg.1 | -3.369522517 | 0.407942629 |
| SCARB1        | TC1200012327.hg.1 | -3.367382642 | 0           |
| SMOX          | TC2000006571.hg.1 | -3.363355049 | 0.664908359 |
| ALDOC         | TC1700010200.hg.1 | -3.355952974 | 0.407942629 |
| ---           | TC1100009723.hg.1 | -3.342064515 | 1.607801004 |
| AK4           | TC0100008618.hg.1 | -3.341050602 | 0.333076753 |
| ARG2          | TC1400007500.hg.1 | -3.337297963 | 0.333076753 |
| SAMD9L        | TC0700011797.hg.1 | -3.337233193 | 3.845686185 |
| LDLR          | TC1900007012.hg.1 | -3.33298887  | 1.037101959 |
| SPINT2        | TC1900011725.hg.1 | -3.312953797 | 0.407942629 |
| TDRKH         | TC0100015803.hg.1 | -3.284938058 | 0           |
| ---           | TC1200009654.hg.1 | -3.283659991 | 1.607801004 |
| MICB          | TC0600007585.hg.1 | -3.282799564 | 0.407942629 |
| RP11-539L10.3 | TC0400009914.hg.1 | -3.275378387 | 0           |
| ARL15         | TC0500010731.hg.1 | -3.268539578 | 0.333076753 |
| LOC389641     | TC0800007012.hg.1 | -3.268064219 | 1.607801004 |



|               |                   |              |             |
|---------------|-------------------|--------------|-------------|
| TCP11L2       | TC1200008726.hg.1 | -3.265416272 | 0.333076753 |
| PLEKHA2       | TC0800007362.hg.1 | -3.253485032 | 0.333076753 |
| SECTM1        | TC1700012110.hg.1 | -3.247353068 | 0.664908359 |
| RP3-331H24.7  | TC0600014307.hg.1 | -3.242588237 | 0           |
| ESR2          | TC1400009402.hg.1 | -3.235036523 | 0.664908359 |
| SNORD8        | TC1400008633.hg.1 | -3.228956488 | 1.037101959 |
| ZNF488        | TC1000010548.hg.1 | -3.22713851  | 0.407942629 |
| C2CD4A        | TC1500007463.hg.1 | -3.224088658 | 0.333076753 |
| SMPDL3B       | TC0100007542.hg.1 | -3.223305095 | 0.407942629 |
| slukeebu      | TC0300013147.hg.1 | -3.208523945 | 1.037101959 |
| RP11-149I23.3 | TC1000008395.hg.1 | -3.188550543 | 1.037101959 |
| ACOT13        | TC0600007203.hg.1 | -3.187606402 | 1.607801004 |
| LSS           | TC2100008462.hg.1 | -3.182413571 | 0           |
| RP11-80B9.1   | TC0100012158.hg.1 | -3.179099674 | 0.333076753 |
| ---           | TC1600008180.hg.1 | -3.174916537 | 2.472534784 |
| CPVL          | TC0700010604.hg.1 | -3.168651693 | 0.664908359 |
| TLR3          | TC0400009543.hg.1 | -3.167857632 | 1.607801004 |
| GRAMD3        | TC0500008539.hg.1 | -3.160693557 | 0           |
| MIR7641-2     | TC0600010160.hg.1 | -3.159462918 | 1.037101959 |
| SLITRK4       | TC0X00011012.hg.1 | -3.154157424 | 0.333076753 |
| RP5-1092A3.4  | TC0100013473.hg.1 | -3.151794013 | 1.037101959 |
| NETO1         | TC1800009011.hg.1 | -3.150802517 | 3.845686185 |
| MAOA          | TC0X00007053.hg.1 | -3.143771257 | 0.333076753 |
| SLC5A3        | TC2100008496.hg.1 | -3.142094708 | 0           |
| ARRB1         | TC1100011643.hg.1 | -3.134044866 | 0           |
| VGLL3         | TC0300011706.hg.1 | -3.109554709 | 0           |
| NRSN2-AS1     | TC2000008123.hg.1 | -3.108113274 | 2.472534784 |
| ---           | TC0400012899.hg.1 | -3.09660815  | 1.037101959 |
| MN1           | TC2200008346.hg.1 | -3.095415693 | 0.664908359 |
| PFKFB4        | TC0300013970.hg.1 | -3.094709879 | 0.333076753 |
| FBXO44        | TC0100006861.hg.1 | -3.083758064 | 0.333076753 |
| ARNTL         | TC1100006899.hg.1 | -3.07906431  | 2.472534784 |
| LTBR          | TC1200006616.hg.1 | -3.078565648 | 0.333076753 |
| ZFP14         | TC1900010521.hg.1 | -3.063114048 | 0           |
| CPE           | TC0400009223.hg.1 | -3.051912112 | 0.333076753 |
| SC5D          | TC1100009306.hg.1 | -3.03702405  | 0.333076753 |
| ---           | TC0800010050.hg.1 | -3.031316517 | 0.333076753 |
| GNE           | TC0900009978.hg.1 | -3.030671533 | 0.407942629 |
| NIPAL1        | TC0400012792.hg.1 | -3.029974881 | 0.333076753 |
| JAM2          | TC2100006784.hg.1 | -3.024390651 | 2.472534784 |
| ZNF204P       | TC0600011194.hg.1 | -3.021870494 | 1.607801004 |

|          |                   |              |             |
|----------|-------------------|--------------|-------------|
| SIX1     | TC1400009351.hg.1 | -3.021336069 | 0           |
| NSDHL    | TC0X00008759.hg.1 | -3.006190983 | 0.333076753 |
| ASPHD2   | TC2200006947.hg.1 | -2.998577132 | 1.607801004 |
| MTUS1    | TC0800009735.hg.1 | -2.991667486 | 1.607801004 |
| AK4P3    | TC1200010290.hg.1 | -2.986383963 | 1.037101959 |
| PECAM1   | TC1700011442.hg.1 | -2.985485889 | 3.845686185 |
| SALL2    | TC1400008637.hg.1 | -2.985075318 | 0.333076753 |
| IDH1     | TC0200015578.hg.1 | -2.977985371 | 0           |
| SHISA3   | TC0400007371.hg.1 | -2.967265802 | 3.845686185 |
| IL17RD   | TC0300011264.hg.1 | -2.962989301 | 0.333076753 |
| HS3ST1   | TC0400010058.hg.1 | -2.958665128 | 2.472534784 |
| C5orf63  | TC0500011943.hg.1 | -2.945908593 | 0.333076753 |
| APOL3    | TC2200008588.hg.1 | -2.942035184 | 2.472534784 |
| LEPROTL1 | TC0800012287.hg.1 | -2.937458222 | 0           |
| CLCN6    | TC0100018166.hg.1 | -2.935448271 | 0.407942629 |
| SLC16A13 | TC1700006721.hg.1 | -2.935063399 | 0           |
| GACAT2   | TC1800008013.hg.1 | -2.930913215 | 0.333076753 |
| LRP5     | TC1100008181.hg.1 | -2.92913056  | 1.037101959 |
| FAM169A  | TC0500013328.hg.1 | -2.926277661 | 0.333076753 |
| MFAP3    | TC0500013260.hg.1 | -2.92123381  | 2.472534784 |
| ALDH7A1  | TC0500011924.hg.1 | -2.920794789 | 0           |
| H2AFJ    | TC1200006946.hg.1 | -2.907949066 | 1.037101959 |
| TSPAN2   | TC0100015364.hg.1 | -2.907081968 | 1.607801004 |
| RNU4-1   | TC1200012156.hg.1 | -2.905320856 | 1.607801004 |
| RNF208   | TC0900012042.hg.1 | -2.888304807 | 0           |
| MXD4     | TC0400009765.hg.1 | -2.882908071 | 0           |
| ---      | TC1000012080.hg.1 | -2.882284009 | 0.407942629 |
| VTRNA2-1 | TC0500012123.hg.1 | -2.882019473 | 3.845686185 |
| CCNJL    | TC0500013392.hg.1 | -2.877240533 | 0.333076753 |
| HHLA3    | TC0100008696.hg.1 | -2.874451954 | 2.472534784 |
| NOC4L    | TC1200009467.hg.1 | -2.867540773 | 0.333076753 |
| EVL      | TC1400008193.hg.1 | -2.867143607 | 0.407942629 |
| FDPS     | TC0100010123.hg.1 | -2.849184736 | 0           |
| doywawbo | TC0500011468.hg.1 | -2.845979789 | 2.472534784 |
| GP1BB    | TC2200006614.hg.1 | -2.824292806 | 1.037101959 |
| CYP2S1   | TC1900008141.hg.1 | -2.820970019 | 1.037101959 |
| SYT14    | TC0100011463.hg.1 | -2.818113726 | 1.037101959 |
| GLS      | TC0200010275.hg.1 | -2.815398552 | 0.333076753 |
| WDR72    | TC1500009478.hg.1 | -2.811775675 | 0.333076753 |
| NAT6     | TC0300013983.hg.1 | -2.811057407 | 0.333076753 |
| FAM213A  | TC1000008234.hg.1 | -2.809387572 | 0.333076753 |

|               |                           |              |             |
|---------------|---------------------------|--------------|-------------|
| TMEM53        | TC0100013983.hg.1         | -2.794748899 | 2.472534784 |
| LOXL1         | TC1500007829.hg.1         | -2.793237184 | 0.407942629 |
| LOC100506990  | TC0800012273.hg.1         | -2.790772295 | 0.333076753 |
| RP5-890E16.2  | TC1700010976.hg.1         | -2.790667677 | 1.037101959 |
| SPAG4         | TC2000007224.hg.1         | -2.788989333 | 1.037101959 |
| CCNG1         | TC0500009319.hg.1         | -2.787614054 | 0.407942629 |
| RP11-46H11.11 | TC1200012547.hg.1         | -2.7863534   | 1.607801004 |
| javuby        | TC0800010049.hg.1         | -2.784440247 | 1.037101959 |
| ---           | TC0300006624.hg.1         | -2.783668343 | 0.333076753 |
| GSTT2         | TC2200008201.hg.1         | -2.777727515 | 1.607801004 |
| ACACA         | TC1700010488.hg.1         | -2.777308618 | 0           |
| RNA5SP355     | TC1200007174.hg.1         | -2.772536109 | 3.845686185 |
| AK4P1         | TC1700007480.hg.1         | -2.769403464 | 2.472534784 |
| COL4A5        | TC0X00008084.hg.1         | -2.768444468 | 3.845686185 |
| ZNF605        | TC1200012877.hg.1         | -2.762725228 | 2.472534784 |
| HOMEZ         | TC1400010716.hg.1         | -2.760856047 | 0.664908359 |
| RHPN2         | TC1900010375.hg.1         | -2.757791396 | 0.664908359 |
| GRAMD1A       | TC1900007829.hg.1         | -2.754894842 | 0.333076753 |
| C14orf1       | TC1400009732.hg.1         | -2.752324994 | 0.407942629 |
| DNAJC28       | TC2100007999.hg.1         | -2.752142491 | 1.037101959 |
| PIK3C2B       | TC0100017029.hg.1         | -2.743380847 | 0.664908359 |
| NEDD9         | TC0600010810.hg.1         | -2.742110894 | 0.664908359 |
| ---           | TC1300007289.hg.1         | -2.738772788 | 2.472534784 |
| ---           | TC0100015077.hg.1         | -2.730056546 | 2.472534784 |
| KCNJ16        | TC1700008768.hg.1         | -2.726328049 | 0.407942629 |
| PDCD2L        | TC1900011708.hg.1         | -2.721195924 | 0.333076753 |
| spoberbo      | TC0400009222.hg.1         | -2.719091437 | 3.845686185 |
| SCARNA22      | TC0400006549.hg.1         | -2.718256943 | 2.472534784 |
| GSTT2         | TC2200006878.hg.1         | -2.702728947 | 0.664908359 |
| ZFP82         | TC1900010523.hg.1         | -2.7007534   | 0.333076753 |
| TM2D2         | TC0800010193.hg.1         | -2.691744856 | 0           |
| ---           | TC0600011408.hg.1         | -2.690340449 | 0.664908359 |
| IRF6          | TC0100017172.hg.1         | -2.684868631 | 0.664908359 |
| ---           | TC0300010670.hg.1         | -2.684445595 | 3.845686185 |
| LGMN          | TC1400010012.hg.1         | -2.681471649 | 1.037101959 |
| FAM174B       | TC1500010929.hg.1         | -2.678928048 | 0.333076753 |
| snerflee      | TC0500012472.hg.1         | -2.673611326 | 1.607801004 |
| ACAT2         | TC0600010057.hg.1         | -2.67033054  | 0.407942629 |
| DCLK1         | TC1300008609.hg.1         | -2.664820147 | 1.607801004 |
|               | HTA2-pos-PSR05025584.hg.1 | -2.662298801 | 0           |
| FLJ46906      | TC0600009615.hg.1         | -2.662032313 | 1.607801004 |

|               |                         |              |             |
|---------------|-------------------------|--------------|-------------|
| LPCAT3        | TC1200009768.hg.1       | -2.662003559 | 0.333076753 |
| FAM60A        | TC1200010281.hg.1       | -2.64726172  | 1.037101959 |
| EXPH5         | TC1100012230.hg.1       | -2.643672868 | 0.333076753 |
| APOL6         | TC2200007214.hg.1       | -2.641421283 | 1.607801004 |
| MIR7641-2     | TC1000009517.hg.1       | -2.635933243 | 3.845686185 |
| RP11-492D6.3  | TC1500008611.hg.1       | -2.632157072 | 0.407942629 |
| NUP50-AS1     | TC2200008965.hg.1       | -2.631283751 | 1.037101959 |
| SLC25A1       | TC2200007976.hg.1       | -2.63115274  | 0           |
| ACOT2         | TC1400007647.hg.1       | -2.631037388 | 0.407942629 |
| ABCG1         | TC2100007241.hg.1       | -2.625899285 | 0.664908359 |
| GMPR2         | TC1400006732.hg.1       | -2.621210713 | 0           |
| ---           | TC2000008452.hg.1       | -2.614944965 | 0.664908359 |
| MVK           | TC1200008803.hg.1       | -2.607018674 | 3.845686185 |
| MAP2K6        | TC1700008757.hg.1       | -2.60427792  | 0.664908359 |
| ZFYVE21       | TC1400008415.hg.1       | -2.60379193  | 0           |
| SNORD116-19   | TC1500010700.hg.1       | -2.591852737 | 1.607801004 |
| ECH1          | TC1900011940.hg.1       | -2.586716    | 0.333076753 |
| EPHX1         | TC0100011770.hg.1       | -2.586343984 | 1.037101959 |
| kleylaw       | TC0900007683.hg.1       | -2.583232804 | 1.037101959 |
| RNU4-61P      | TC0100008223.hg.1       | -2.57987977  | 1.607801004 |
| GPI           | TC1900011707.hg.1       | -2.57843379  | 1.037101959 |
| ---           | TC0700010406.hg.1       | -2.576219167 | 1.037101959 |
| ACBD7         | TC1000012525.hg.1       | -2.571236534 | 1.607801004 |
| SYNE2         | TC1400007430.hg.1       | -2.570394858 | 0.407942629 |
| RPP25L        | TC0900009908.hg.1       | -2.566858764 | 0.407942629 |
| GULP1         | TC0200010236.hg.1       | -2.566369972 | 0.333076753 |
| PTGER4        | TC0500007231.hg.1       | -2.566190016 | 1.607801004 |
| TLCD1         | TC1700010209.hg.1       | -2.565253973 | 2.472534784 |
| RP11-395P16.1 | TC0300007307.hg.1       | -2.556769612 | 0           |
| DYRK1B        | TSUnmapped00000019.hg.1 | -2.551482359 | 1.037101959 |
| EXD2          | TC1400007547.hg.1       | -2.549791004 | 0.333076753 |
| SDHAF3        | TC0700008430.hg.1       | -2.5333007   | 0.333076753 |
| SIAE          | TC1100012681.hg.1       | -2.530529279 | 1.037101959 |
| NAPEPLD       | TC0700012115.hg.1       | -2.530219565 | 0.664908359 |
| ATP8A1        | TC0400010558.hg.1       | -2.528774835 | 1.607801004 |
| SLAIN1        | TC1300007565.hg.1       | -2.524117522 | 0.664908359 |
| LOC100190987  | TC1500009210.hg.1       | -2.523859472 | 1.607801004 |
| RP11-7I15.3   | TC1100008547.hg.1       | -2.521137552 | 0.407942629 |
| VIPR1         | TC0300007161.hg.1       | -2.519935255 | 3.845686185 |
| ZNF580        | TC1900011804.hg.1       | -2.515701791 | 1.037101959 |
| PTGR2         | TC1400010624.hg.1       | -2.514363382 | 1.607801004 |

|           |                         |              |             |
|-----------|-------------------------|--------------|-------------|
| LGALS1    | TC0200007803.hg.1       | -2.512067679 | 2.472534784 |
| SSPN      | TC1200012610.hg.1       | -2.510036192 | 3.845686185 |
| SLC25A23  | TC1900009431.hg.1       | -2.504722022 | 0.664908359 |
| TSPAN8    | TC1200011251.hg.1       | -2.50390993  | 2.472534784 |
| ZFHX4     | TC0800008011.hg.1       | -2.50232527  | 0.664908359 |
| ---       | TC2200008593.hg.1       | -2.500977509 | 3.845686185 |
| CFH       | TC0100011064.hg.1       | -2.500889822 | 2.472534784 |
| ZMYM2     | TC1300006481.hg.1       | -2.499052714 | 0.664908359 |
| RNA5SP141 | TC0300012508.hg.1       | -2.499010708 | 2.472534784 |
| SNORA47   | TC0500011203.hg.1       | -2.498349246 | 1.607801004 |
| TBX15     | TC0100015445.hg.1       | -2.496644802 | 1.037101959 |
| RGS5      | TC0100016218.hg.1       | -2.496260507 | 2.472534784 |
| GAB2      | TC1100011744.hg.1       | -2.493958283 | 0.333076753 |
| GARNL3    | TC0900012173.hg.1       | -2.492062066 | 0.333076753 |
| NLN       | TC0500007607.hg.1       | -2.491837519 | 0.664908359 |
| FAM60CP   | TC1800008837.hg.1       | -2.488603116 | 3.845686185 |
| FAM85A    | TC0800012271.hg.1       | -2.476934411 | 0.407942629 |
| LINC01599 | TC1400010749.hg.1       | -2.475564863 | 1.607801004 |
| IMPA2     | TC1800006715.hg.1       | -2.469487929 | 0.664908359 |
| TBC1D10A  | TC2200009338.hg.1       | -2.463427905 | 2.472534784 |
| MFI2-AS1  | TC0300010046.hg.1       | -2.462020743 | 0.407942629 |
| LXN       | TC0300012943.hg.1       | -2.458704464 | 1.037101959 |
| FBXO17    | TC1900011944.hg.1       | -2.458538731 | 1.037101959 |
| REEP4     | TC0800009830.hg.1       | -2.456891533 | 2.472534784 |
| ---       | TSUnmapped00000920.hg.1 | -2.454826961 | 0.407942629 |
| ZNF260    | TC1900010528.hg.1       | -2.447175667 | 0.333076753 |
| PTOV1     | TC1900008560.hg.1       | -2.446652711 | 0.407942629 |
| PDCD4     | TC1000008904.hg.1       | -2.445406267 | 1.037101959 |
| RNU7-51P  | TC1400007838.hg.1       | -2.444459213 | 1.037101959 |
| TENM3     | TC0400009431.hg.1       | -2.442121677 | 1.607801004 |
| HDHD3     | TC0900011259.hg.1       | -2.439101846 | 1.037101959 |
| NUDCD2    | TC0500013395.hg.1       | -2.436890062 | 0.664908359 |
| LINC00899 | TC2200008999.hg.1       | -2.435618062 | 3.845686185 |
| RFX7      | TC1500009514.hg.1       | -2.431175711 | 0.333076753 |
| ---       | TC0X00008127.hg.1       | -2.430540207 | 0.333076753 |
| SNORD59   | TC0200015296.hg.1       | -2.423722731 | 2.472534784 |
| SNORA22   | TC0700007814.hg.1       | -2.422488807 | 1.607801004 |
| AP1S3     | TC0200015869.hg.1       | -2.419913814 | 2.472534784 |
| SNORA71C  | TC2000009072.hg.1       | -2.416973519 | 1.037101959 |
| YPEL3     | TC1600009952.hg.1       | -2.416136005 | 1.037101959 |
| KIAA1804  | TC0100012002.hg.1       | -2.413490671 | 1.607801004 |

|              |                         |              |             |
|--------------|-------------------------|--------------|-------------|
|              | HTA2-pos-3234819_st     | -2.413469062 | 1.607801004 |
| TMEM187      | TC0X00008811.hg.1       | -2.411264923 | 1.607801004 |
|              | HTA2-neg-47420419_st    | -2.410612483 | 2.472534784 |
| ABHD4        | TC1400006652.hg.1       | -2.40891335  | 3.845686185 |
| TRIM5        | TC1100009940.hg.1       | -2.402107695 | 0.407942629 |
| sokuma       | TC1500009383.hg.1       | -2.394788781 | 1.607801004 |
| RP1-72A23.1  | TC0600008756.hg.1       | -2.394738015 | 0.664908359 |
| SPOCK3       | TC0400012350.hg.1       | -2.394653361 | 1.037101959 |
| TCF7L1       | TC0200008236.hg.1       | -2.392933686 | 3.845686185 |
| LINC-PINT    | TC0700013625.hg.1       | -2.390593224 | 2.472534784 |
| seysawbu     | TC0900008385.hg.1       | -2.388709506 | 2.472534784 |
| SLC16A14     | TC0200015971.hg.1       | -2.387391359 | 1.037101959 |
| DPYSL2       | TC0800007086.hg.1       | -2.386871391 | 0           |
| CTA-415G2.2  | TC2200007153.hg.1       | -2.386015916 | 1.607801004 |
| IKBKB        | TC0800007435.hg.1       | -2.385893258 | 0           |
| VDAC3        | TC0800007440.hg.1       | -2.381237743 | 0.333076753 |
| PAIP2        | TC0500008814.hg.1       | -2.379289518 | 0.333076753 |
| EPHB4        | TC0700012016.hg.1       | -2.378166679 | 1.607801004 |
| RP11-77P16.4 | TC0300013868.hg.1       | -2.377788535 | 2.472534784 |
| MKNK2        | TC1900009201.hg.1       | -2.376858469 | 2.472534784 |
| ZNF620       | TC0300007123.hg.1       | -2.373689945 | 0.333076753 |
| CYYR1        | TC2100007816.hg.1       | -2.37365128  | 0.664908359 |
| ADAMTS15     | TC1100009533.hg.1       | -2.369481669 | 0.664908359 |
| PROSC        | TC0800007309.hg.1       | -2.367603509 | 1.037101959 |
| ---          | TSUnmapped00001000.hg.1 | -2.366419479 | 0.664908359 |
| RBP4         | TC1000011450.hg.1       | -2.362632107 | 1.607801004 |
| ESRP2        | TC1600010676.hg.1       | -2.361947395 | 2.472534784 |
| DPYSL3       | TC0500012388.hg.1       | -2.359807483 | 2.472534784 |
| jerjerby     | TC1200012560.hg.1       | -2.359679357 | 1.607801004 |
| RP11-126K1.8 | TC0100009953.hg.1       | -2.359460741 | 1.037101959 |
| SARAF        | TC0800010016.hg.1       | -2.358937999 | 1.037101959 |
| SNORA22      | TC0700007796.hg.1       | -2.353227553 | 1.607801004 |
| SCARNA9L     | TC0X00009217.hg.1       | -2.346265187 | 0.664908359 |
| PANK3        | TC0500013399.hg.1       | -2.343386629 | 0.407942629 |
| PRR34-AS1    | TC2200009286.hg.1       | -2.341803189 | 2.472534784 |
| RERG         | TC1200012768.hg.1       | -2.338416774 | 1.607801004 |
| PIK3R3       | TC0100014040.hg.1       | -2.337740836 | 2.472534784 |
| SNORD70      | TC0200010481.hg.1       | -2.33678891  | 2.472534784 |
| NDUFA2       | TC0500012248.hg.1       | -2.33410587  | 0.333076753 |
| MEF2C        | TC0500011418.hg.1       | -2.333684855 | 2.472534784 |
| DDX11-AS1    | TC1200010271.hg.1       | -2.332083858 | 3.845686185 |

|               |                         |              |             |
|---------------|-------------------------|--------------|-------------|
|               | HTA2-pos-3234813_st     | -2.331040656 | 1.607801004 |
| KIF20A        | TC0500008777.hg.1       | -2.329577511 | 0.407942629 |
| ANKLE2        | TC1200012543.hg.1       | -2.326133934 | 0.407942629 |
| ORAI3         | TC1600011386.hg.1       | -2.325258054 | 1.607801004 |
| Y_RNA         | TC0200012356.hg.1       | -2.324486021 | 1.607801004 |
| RP1-20I3.3    | TC0X00008403.hg.1       | -2.324243949 | 0.664908359 |
| KIAA0141      | TC0500008917.hg.1       | -2.323084422 | 0.664908359 |
| SENCR         | TC1100012785.hg.1       | -2.319738743 | 0.333076753 |
| TMEM135       | TC1100008673.hg.1       | -2.318606642 | 1.607801004 |
| CTB-55P19.1   | TC1600010206.hg.1       | -2.310847412 | 3.845686185 |
| ITPK1         | TC1400010015.hg.1       | -2.308176158 | 1.037101959 |
| DLGAP1-AS1    | TC1800006518.hg.1       | -2.303025151 | 3.845686185 |
| TGIF1         | TC1800006513.hg.1       | -2.301753489 | 0           |
| TRIM21        | TC1100009880.hg.1       | -2.301626654 | 2.472534784 |
| PALLD         | TC0400009258.hg.1       | -2.299567426 | 1.607801004 |
| FAM118A       | TC2200007614.hg.1       | -2.298406004 | 0.333076753 |
| RNU4-2        | TC1200012155.hg.1       | -2.298186428 | 2.472534784 |
| RNF170        | TC0800010299.hg.1       | -2.296064097 | 2.472534784 |
| FNBP1L        | TC0100009064.hg.1       | -2.295552881 | 0.664908359 |
| RP11-380G5.2  | TC1000008364.hg.1       | -2.288517911 | 2.472534784 |
| KREMEN1       | TC2200009248.hg.1       | -2.284186581 | 1.607801004 |
| BCORL1        | TC0X00008394.hg.1       | -2.283302755 | 1.607801004 |
| WDR59         | TC1600010864.hg.1       | -2.282942727 | 1.607801004 |
| ACP6          | TC0100015634.hg.1       | -2.281701001 | 1.607801004 |
| CTD-2022H16.3 | TSUnmapped00000551.hg.1 | -2.281694938 | 2.472534784 |
| ACOT1         | TC1400007644.hg.1       | -2.278525079 | 3.845686185 |
| PLPP1         | TC0500010766.hg.1       | -2.27787461  | 0.407942629 |
| BNIP3L        | TC0800007080.hg.1       | -2.277068197 | 0.333076753 |
| ---           | TC2200007099.hg.1       | -2.275913274 | 0.333076753 |
| 41698         | TC0100011665.hg.1       | -2.275536667 | 3.845686185 |
| ---           | TC1200012772.hg.1       | -2.275389853 | 2.472534784 |
| CRHR1-IT1     | TC1700012270.hg.1       | -2.266617314 | 0           |
| SYNGR2        | TC1700009040.hg.1       | -2.264744552 | 2.472534784 |
| FBXO34        | TC1400007232.hg.1       | -2.262179773 | 0.664908359 |
| CTD-2207P18.2 | TC1400009700.hg.1       | -2.262026504 | 1.037101959 |
| ERCC8         | TC0500010872.hg.1       | -2.259490122 | 2.472534784 |
| EPB41L5       | TC0200009078.hg.1       | -2.257917332 | 0.407942629 |
| ---           | TC0600008273.hg.1       | -2.256664712 | 1.607801004 |
| ISYNA1        | TC1900010016.hg.1       | -2.255104961 | 2.472534784 |
| CABYR         | TC1800006905.hg.1       | -2.249555691 | 1.607801004 |
| DYRK1B        | TSUnmapped00000256.hg.1 | -2.241282107 | 1.037101959 |

|               |                           |              |             |
|---------------|---------------------------|--------------|-------------|
| AC093818.1    | TC0200016749.hg.1         | -2.240507672 | 2.472534784 |
| COX6B1        | TC1900007871.hg.1         | -2.239659117 | 1.037101959 |
| FBXL2         | TC0300006994.hg.1         | -2.238935422 | 1.607801004 |
| speezeby      | TC1200006642.hg.1         | -2.234322725 | 0.333076753 |
| RP11-364P2.2  | TC0400011739.hg.1         | -2.234090172 | 1.037101959 |
| ARSA          | TC2200009170.hg.1         | -2.233417943 | 2.472534784 |
|               | HTA2-pos-3706157_st       | -2.233123954 | 1.607801004 |
| RP11-442H21.2 | TC1000010986.hg.1         | -2.232134302 | 3.845686185 |
|               | HTA2-pos-PSR08004871.hg.1 | -2.23169391  | 0.333076753 |
| PPM1K         | TC0400011283.hg.1         | -2.231609735 | 3.845686185 |
| SLC22A5       | TC0500008632.hg.1         | -2.229759458 | 0.407942629 |
| VAMP1         | TC1200009734.hg.1         | -2.229278328 | 3.845686185 |
| NME4          | TC1600011317.hg.1         | -2.226857386 | 0.664908359 |
| ---           | TC0700011893.hg.1         | -2.226731205 | 3.845686185 |
| PGAM5         | TC1200012731.hg.1         | -2.225883239 | 0.407942629 |
| SNORD60       | TC1600009095.hg.1         | -2.2249545   | 0.664908359 |
| LOC101929897  | TC0800010278.hg.1         | -2.218154721 | 2.472534784 |
|               | HTA2-pos-3234802_st       | -2.217990214 | 1.037101959 |
| ABCB1         | TC0700011706.hg.1         | -2.216757567 | 0.664908359 |
|               | HTA2-pos-PSR08024263.hg.1 | -2.216161214 | 2.472534784 |
| SCAMP1        | TC0500007868.hg.1         | -2.215104867 | 0.333076753 |
| FBXO27        | TC1900011946.hg.1         | -2.214372349 | 0.664908359 |
| LY6K          | TC0800009157.hg.1         | -2.209546051 | 1.037101959 |
| PTX3          | TC0300009301.hg.1         | -2.208610733 | 1.607801004 |
| KCTD11        | TC1700006741.hg.1         | -2.205826776 | 3.845686185 |
| TTI2          | TC0800012406.hg.1         | -2.205409918 | 1.037101959 |
| CHKB          | TC2200009365.hg.1         | -2.203398337 | 1.607801004 |
| ZNF302        | TC1900007819.hg.1         | -2.202850366 | 1.607801004 |
|               | HTA2-pos-PSR08004876.hg.1 | -2.202675034 | 0.664908359 |
| SNORD63       | TC0500012184.hg.1         | -2.199919271 | 1.607801004 |
| PUDP          | TC0X00009007.hg.1         | -2.199330624 | 1.607801004 |
| PAIP2         | TC0500012203.hg.1         | -2.19762643  | 0.664908359 |
| CADM1         | TC1100012389.hg.1         | -2.193375269 | 1.607801004 |
| RP11-22K10.1  | TC1400009874.hg.1         | -2.190994455 | 1.037101959 |
| kiriru        | TC1900010613.hg.1         | -2.190836012 | 2.472534784 |
| TRMT1L        | TC0100016685.hg.1         | -2.186966569 | 0.664908359 |
| ANKRD1        | TC1000011400.hg.1         | -2.185797751 | 3.845686185 |
| NUDT12        | TC0500011614.hg.1         | -2.184629054 | 1.037101959 |
| HSD17B11      | TC0400012945.hg.1         | -2.184538199 | 0.333076753 |
| AFMID         | TC1700009042.hg.1         | -2.1820519   | 2.472534784 |
| ---           | TC0600011210.hg.1         | -2.181958885 | 2.472534784 |



|              |                           |              |             |
|--------------|---------------------------|--------------|-------------|
| FAM60BP      | TC1800008335.hg.1         | -2.18189549  | 3.845686185 |
| EPB41L1      | TC2000007239.hg.1         | -2.179305952 | 1.607801004 |
| BCL6         | TC0300013471.hg.1         | -2.175760864 | 1.607801004 |
| RP11-468E2.5 | TC1400006719.hg.1         | -2.173383729 | 2.472534784 |
| LINC00987    | TC1200006749.hg.1         | -2.17176738  | 1.607801004 |
| FZD3         | TC0800007137.hg.1         | -2.169402879 | 0.407942629 |
| SLC50A1      | TC0100010112.hg.1         | -2.167934496 | 2.472534784 |
| CSNK1G2      | TC1900006565.hg.1         | -2.167224713 | 0.407942629 |
| MKL1         | TC2200008781.hg.1         | -2.166379261 | 1.607801004 |
| DPY19L3      | TC1900007744.hg.1         | -2.165911182 | 1.037101959 |
| RPL10P15     | TC1900006952.hg.1         | -2.165704889 | 1.607801004 |
| AP4S1        | TC1400006833.hg.1         | -2.16508125  | 0.407942629 |
| ---          | TC1200006723.hg.1         | -2.163989251 | 1.607801004 |
| MRPL22       | TC0500009183.hg.1         | -2.163306501 | 1.607801004 |
|              | HTA2-pos-PSR05025585.hg.1 | -2.161258543 | 0.333076753 |
| SELO         | TC2200007792.hg.1         | -2.160524988 | 1.607801004 |
| blashee      | TC2200007623.hg.1         | -2.159256551 | 2.472534784 |
| FAM117B      | TC0200010502.hg.1         | -2.159178476 | 2.472534784 |
| RN7SL587P    | TC1400009788.hg.1         | -2.158555594 | 2.472534784 |
|              | HTA2-pos-PSR08024267.hg.1 | -2.154683298 | 1.037101959 |
| ---          | TC0800012171.hg.1         | -2.154228821 | 1.037101959 |
|              | HTA2-pos-PSR08024264.hg.1 | -2.153701537 | 0.333076753 |
| RP11-79P5.9  | TC0500011123.hg.1         | -2.152444194 | 1.037101959 |
| MPST         | TC2200007277.hg.1         | -2.14227868  | 1.607801004 |
| RPPH1        | TC1400008586.hg.1         | -2.140343721 | 2.472534784 |
| HMBOX1       | TC0800012285.hg.1         | -2.139888066 | 2.472534784 |
| MOAP1        | TC1400010019.hg.1         | -2.13831182  | 0.664908359 |
| RNA5SP335    | TC1100010293.hg.1         | -2.134686434 | 2.472534784 |
| ZSCAN2       | TC1500008154.hg.1         | -2.133709841 | 0.407942629 |
| RBPMS        | TC0800007185.hg.1         | -2.131224393 | 0.333076753 |
| CHEK2        | TC2200008367.hg.1         | -2.128771105 | 3.845686185 |
|              | HTA2-pos-PSR08004875.hg.1 | -2.126522078 | 1.037101959 |
| SLC9A3R1     | TC1700008867.hg.1         | -2.119041242 | 1.607801004 |
| DZIP3        | TC0300008289.hg.1         | -2.11599688  | 1.607801004 |
| CCNG2        | TC0400012818.hg.1         | -2.11376379  | 2.472534784 |
|              | HTA2-pos-PSR05025587.hg.1 | -2.110450268 | 1.607801004 |
| shoytu       | TC2100008464.hg.1         | -2.107478018 | 0.664908359 |
|              | HTA2-pos-PSR08024268.hg.1 | -2.106694205 | 0.664908359 |
| SNORD24      | TSUnmapped00000340.hg.1   | -2.104442853 | 0.664908359 |
| ---          | TSUnmapped00000845.hg.1   | -2.104442853 | 0.664908359 |
| CDKN2A       | TC0900012219.hg.1         | -2.103001676 | 3.845686185 |

|              |                           |              |             |
|--------------|---------------------------|--------------|-------------|
| CMB9-22P13.1 | TC1100008020.hg.1         | -2.098139472 | 3.845686185 |
| MOB3A        | TC1900009204.hg.1         | -2.097066338 | 1.607801004 |
| LINC00493    | TC2000009895.hg.1         | -2.094648741 | 2.472534784 |
|              | HTA2-pos-PSR08024262.hg.1 | -2.092513601 | 1.037101959 |
| CDK7         | TC0500007668.hg.1         | -2.084576282 | 0.664908359 |
| RNF165       | TC1800007220.hg.1         | -2.08286572  | 2.472534784 |
| UBE2WP1      | TC0100009136.hg.1         | -2.082520095 | 2.472534784 |
| LIPA         | TC1000012577.hg.1         | -2.081959013 | 2.472534784 |
| PPM1L        | TC0300009353.hg.1         | -2.081663798 | 2.472534784 |
| MSI2         | TC1700008378.hg.1         | -2.078676137 | 2.472534784 |
| MCAT         | TC2200008903.hg.1         | -2.078249935 | 1.607801004 |
| LRRC28       | TC1500008511.hg.1         | -2.077552594 | 1.037101959 |
| CNOT7P1      | TC0X00009951.hg.1         | -2.068182743 | 0.333076753 |
| ANO7P1       | TC0100013035.hg.1         | -2.065525804 | 2.472534784 |
| IRF2BPL      | TC1400009766.hg.1         | -2.062953425 | 2.472534784 |
| LMO7         | TC1300009980.hg.1         | -2.06197356  | 2.472534784 |
| RP1-261D10.2 | TC1400009601.hg.1         | -2.061677249 | 3.845686185 |
| CNKSR1       | TC0100007444.hg.1         | -2.059395493 | 1.037101959 |
| DBI          | TC0200009065.hg.1         | -2.05913131  | 1.607801004 |
| FAM85B       | TC0800009500.hg.1         | -2.058404477 | 1.607801004 |
| ADAM9        | TC0800007367.hg.1         | -2.054267656 | 3.845686185 |
| PPP2R2A      | TC0800007077.hg.1         | -2.053482283 | 0.407942629 |
| GLRX3        | TC1000009345.hg.1         | -2.050517894 | 0.407942629 |
| RN7SL253P    | TC0400009320.hg.1         | -2.048390349 | 1.607801004 |
| SNAPC1       | TC1400010620.hg.1         | -2.046693401 | 2.472534784 |
| ZKSCAN7      | TSUnmapped00000306.hg.1   | -2.046227543 | 2.472534784 |
| UQCR10       | TC2200007035.hg.1         | -2.045883743 | 0.664908359 |
| ARSK         | TC0500008121.hg.1         | -2.041846859 | 0.407942629 |
| AK4P6        | TC0400008981.hg.1         | -2.041509456 | 2.472534784 |
| DNASE1       | TC1600011345.hg.1         | -2.041397905 | 1.607801004 |
| snomorbu     | TC0100014339.hg.1         | -2.040883621 | 1.037101959 |
| lyjee        | TC0600008162.hg.1         | -2.037944364 | 1.607801004 |
|              | HTA2-pos-PSR08004877.hg.1 | -2.037574533 | 0.407942629 |
| ---          | TSUnmapped00000997.hg.1   | -2.037297498 | 1.037101959 |
| SMO          | TC0700009082.hg.1         | -2.035855854 | 2.472534784 |
| DDT          | TC2200008203.hg.1         | -2.032213064 | 1.607801004 |
| NDUFA1       | TC0X00008259.hg.1         | -2.030284166 | 0.664908359 |
| C11orf54     | TC1100008790.hg.1         | -2.030168538 | 3.845686185 |
| LOC102724814 | TC1400006693.hg.1         | -2.029985023 | 3.845686185 |
| ---          | TC1100012468.hg.1         | -2.029191234 | 3.845686185 |
| U4           | TC1100012824.hg.1         | -2.026866053 | 1.037101959 |

|               |                           |              |             |
|---------------|---------------------------|--------------|-------------|
| LOXL1-AS1     | TC1500009995.hg.1         | -2.025978691 | 1.607801004 |
|               | HTA2-pos-PSR08004872.hg.1 | -2.025914562 | 1.037101959 |
| BNIP3P1       | TC1400006783.hg.1         | -2.025662514 | 1.607801004 |
| RNU4-59P      | TC0100014934.hg.1         | -2.025544808 | 3.845686185 |
| FAM189B       | TC0100015950.hg.1         | -2.024488807 | 1.607801004 |
| ATP8B2        | TC0100010075.hg.1         | -2.023502199 | 1.607801004 |
| SDR39U1       | TC1400008760.hg.1         | -2.022134323 | 2.472534784 |
| ---           | TC1100010558.hg.1         | -2.021962396 | 2.472534784 |
| TAF7          | TC0500012271.hg.1         | -2.020288976 | 1.037101959 |
| SEC23A        | TC1400009002.hg.1         | -2.020162948 | 2.472534784 |
| SDCBPP2       | TC0800007912.hg.1         | -2.017983903 | 1.607801004 |
| AC005480.1    | TC1400007664.hg.1         | -2.010995124 | 2.472534784 |
|               | HTA2-pos-PSR08004869.hg.1 | -2.010293061 | 1.607801004 |
| AC027319.1    | TC1900009370.hg.1         | -2.007020473 | 3.845686185 |
| NUMB          | TC1400009649.hg.1         | -2.004820863 | 0.664908359 |
| HSD17B4       | TC0500013219.hg.1         | -2.003696731 | 0.664908359 |
| RP11-157L3.10 | TC0900007277.hg.1         | -2.002085496 | 2.472534784 |
| CBY1          | TC2200007360.hg.1         | -2.001576838 | 3.845686185 |
| POU5F1        | TC0600011406.hg.1         | -2.000616881 | 1.607801004 |
| FLI1          | TC1100009485.hg.1         | -1.998332521 | 3.845686185 |
| LSM1          | TC0800010154.hg.1         | -1.99775431  | 2.472534784 |
|               | HTA2-pos-PSR19006628.hg.1 | -1.996853279 | 1.037101959 |
| COCH          | TC1400006828.hg.1         | -1.996633217 | 3.845686185 |
| stertuby      | TC0900007947.hg.1         | -1.994927984 | 0.407942629 |
| HOTAIRM1      | TC0700007000.hg.1         | -1.994439001 | 1.607801004 |
| TSPAN6        | TC0X00010329.hg.1         | -1.992899788 | 0.333076753 |
| ALG12         | TC2200009128.hg.1         | -1.990558701 | 2.472534784 |
| YIF1B         | TC1900010597.hg.1         | -1.989402231 | 1.037101959 |
| PPP1R9A       | TC0700008375.hg.1         | -1.989389591 | 2.472534784 |
| Y_RNA         | TC0600011456.hg.1         | -1.989044082 | 2.472534784 |
| AKAP8L        | TC1900009867.hg.1         | -1.985742196 | 1.607801004 |
| PSME1         | TC1400006718.hg.1         | -1.985214641 | 1.607801004 |
| PSENNEN       | TC1900011713.hg.1         | -1.97987132  | 0.664908359 |
| PEX5L         | TC0300013277.hg.1         | -1.977192492 | 3.845686185 |
| IP6K2         | TC0300013975.hg.1         | -1.976938969 | 1.037101959 |
| SIMC1         | TC0500009580.hg.1         | -1.97418816  | 1.037101959 |
| INTS9         | TC0800009988.hg.1         | -1.972658195 | 1.607801004 |
| ---           | TC2100007424.hg.1         | -1.971148315 | 2.472534784 |
| BNIP3         | TC1000012329.hg.1         | -1.969724921 | 2.472534784 |
| ATP7B         | TC1300009004.hg.1         | -1.969384306 | 2.472534784 |
|               | HTA2-neg-47423504_st      | -1.962245431 | 3.845686185 |

|               |                           |              |             |
|---------------|---------------------------|--------------|-------------|
| FCHSD1        | TC0500012285.hg.1         | -1.960416349 | 0.407942629 |
| AC003973.5    | TC1900010167.hg.1         | -1.960121046 | 2.472534784 |
| SYNJ2BP-COX16 | TC1400009576.hg.1         | -1.955076645 | 3.845686185 |
| ---           | TC1500007403.hg.1         | -1.953414237 | 3.845686185 |
| ACSF2         | TC1700008254.hg.1         | -1.949120453 | 2.472534784 |
| IL18          | TC1100012318.hg.1         | -1.948372015 | 1.037101959 |
| PATZ1         | TC2200008477.hg.1         | -1.947200801 | 3.845686185 |
| PRR3          | TC0600007534.hg.1         | -1.945878772 | 2.472534784 |
| DPM3          | TC0100015943.hg.1         | -1.944526416 | 1.607801004 |
| MFAP1         | TC1500009236.hg.1         | -1.943767503 | 2.472534784 |
|               | HTA2-pos-PSR08004870.hg.1 | -1.941161296 | 2.472534784 |
| STRN3         | TC1400008838.hg.1         | -1.93988124  | 1.037101959 |
| ZNF92         | TC0700007807.hg.1         | -1.939297538 | 3.845686185 |
| AP5M1         | TC1400007282.hg.1         | -1.938867435 | 1.607801004 |
| MRPL40        | TC2200006601.hg.1         | -1.936431991 | 1.607801004 |
|               | HTA2-pos-2924329_st       | -1.935560854 | 0.407942629 |
| KIAA1958      | TC0900008467.hg.1         | -1.934780184 | 2.472534784 |
| ---           | TC0800008108.hg.1         | -1.934744645 | 2.472534784 |
| KIF13B        | TC0800009997.hg.1         | -1.933422586 | 3.845686185 |
| snoU13        | TC0800011307.hg.1         | -1.932579148 | 3.845686185 |
| BAG4          | TC0800007328.hg.1         | -1.931526762 | 2.472534784 |
| SAMM50        | TC2200009282.hg.1         | -1.929934208 | 1.037101959 |
| ZFP62         | TC0500013109.hg.1         | -1.928320245 | 3.845686185 |
| PSMA3         | TC1400007300.hg.1         | -1.926574978 | 0.333076753 |
| ALS2          | TC0200015434.hg.1         | -1.925315662 | 1.037101959 |
| ---           | TC1100012080.hg.1         | -1.924247003 | 3.845686185 |
| RP11-546B8.5  | TC0500009421.hg.1         | -1.921246325 | 2.472534784 |
|               | HTA2-pos-3234816_st       | -1.917336202 | 3.845686185 |
| LBR           | TC0100017488.hg.1         | -1.91663307  | 1.037101959 |
| BCL2L11       | TC0200008870.hg.1         | -1.915311217 | 3.845686185 |
| AC007228.9    | TC1900011538.hg.1         | -1.914814983 | 1.607801004 |
| RWDD2B        | TC2100007852.hg.1         | -1.914615021 | 1.607801004 |
| GTF2E2        | TC0800012404.hg.1         | -1.913854075 | 2.472534784 |
|               | HTA2-pos-PSR08024265.hg.1 | -1.913046136 | 1.607801004 |
| CTC-487M23.7  | TC0500008337.hg.1         | -1.91023637  | 3.845686185 |
| FAM127B       | TC0X00011399.hg.1         | -1.909808963 | 1.037101959 |
| ZNF790        | TC1900010538.hg.1         | -1.908910659 | 2.472534784 |
| PYGL          | TC1400009147.hg.1         | -1.908724875 | 0.664908359 |
| CUL7          | TC0600011857.hg.1         | -1.906251096 | 2.472534784 |
| ---           | TC0500013210.hg.1         | -1.905595067 | 2.472534784 |
| SNORD36       | TC1300006564.hg.1         | -1.905160444 | 3.845686185 |

|               |                           |              |             |
|---------------|---------------------------|--------------|-------------|
| SUSD1         | TC0900011220.hg.1         | -1.904393135 | 0.664908359 |
| PEG10         | TC0700008367.hg.1         | -1.903180199 | 1.037101959 |
| EFEMP1        | TC0200012656.hg.1         | -1.901782817 | 2.472534784 |
| URB1-AS1      | TC2100006920.hg.1         | -1.896011327 | 3.845686185 |
| GGPS1         | TC0100012055.hg.1         | -1.895688168 | 2.472534784 |
| FAM27AP1      | TC0900010312.hg.1         | -1.894864803 | 3.845686185 |
|               | HTA2-pos-PSR22012031.hg.1 | -1.894433721 | 1.037101959 |
| RN7SL126P     | TC0200013279.hg.1         | -1.8925711   | 2.472534784 |
| zoyfawbu      | TC0300012835.hg.1         | -1.891856506 | 2.472534784 |
| PNPLA6        | TC1900011654.hg.1         | -1.88913395  | 1.607801004 |
| PROSER3       | TC1900007882.hg.1         | -1.888286272 | 3.845686185 |
| APBB3         | TC0500013374.hg.1         | -1.887773269 | 1.607801004 |
| MIR3129       | TC0200015205.hg.1         | -1.887706754 | 3.845686185 |
| ABCA13        | TC0700007479.hg.1         | -1.886963042 | 3.845686185 |
| LOC100049716  | TC1200006447.hg.1         | -1.886854922 | 0.407942629 |
| NPEPPS        | TC1700008128.hg.1         | -1.885658384 | 1.607801004 |
| ---           | TC0500010327.hg.1         | -1.88458278  | 1.607801004 |
| RPL7P26       | TC0600010945.hg.1         | -1.884184403 | 2.472534784 |
| DARS          | TC0200014407.hg.1         | -1.881742429 | 1.037101959 |
| LOC440434     | TC1700007628.hg.1         | -1.881722864 | 2.472534784 |
| CNOT7         | TC0800012392.hg.1         | -1.876866236 | 2.472534784 |
| RN7SL147P     | TC0300010279.hg.1         | -1.874652035 | 3.845686185 |
| ---           | TC0100017243.hg.1         | -1.874153886 | 3.845686185 |
| INSIG2        | TC0200009049.hg.1         | -1.871581016 | 3.845686185 |
| EIF2B2        | TC1400007695.hg.1         | -1.87132482  | 2.472534784 |
| CH17-258A22.4 | TC1700007698.hg.1         | -1.871117295 | 1.037101959 |
| SIX4          | TC1400009353.hg.1         | -1.86998712  | 2.472534784 |
| AC093673.5    | TC0700012885.hg.1         | -1.86710837  | 2.472534784 |
| MCCC2         | TC0500007729.hg.1         | -1.865031503 | 2.472534784 |
| ---           | TC1600009298.hg.1         | -1.863449644 | 2.472534784 |
| PACSIN2       | TC2200009357.hg.1         | -1.862263861 | 1.037101959 |
| DCTN6         | TC0800012288.hg.1         | -1.861295995 | 1.037101959 |
| C5orf45       | TC0500013425.hg.1         | -1.857275284 | 2.472534784 |
| NMNAT2        | TC0100016649.hg.1         | -1.854935686 | 1.607801004 |
| DHCR24        | TC0100014276.hg.1         | -1.853595782 | 1.607801004 |
| COPS5         | TC0800012424.hg.1         | -1.853343119 | 1.607801004 |
| CHMP7         | TC0800007013.hg.1         | -1.852262196 | 2.472534784 |
| SGSM3         | TC2200009276.hg.1         | -1.852000087 | 1.607801004 |
| ferswey       | TC1400006727.hg.1         | -1.851448068 | 2.472534784 |
| ZNF346        | TC0500009606.hg.1         | -1.850644666 | 3.845686185 |
| SNORD89       | TC0200016719.hg.1         | -1.849320681 | 2.472534784 |

|               |                           |              |             |
|---------------|---------------------------|--------------|-------------|
| TINAGL1       | TC0100007645.hg.1         | -1.847379162 | 1.037101959 |
| YARS2         | TC1200010336.hg.1         | -1.846624245 | 1.037101959 |
| SNORA59B      | TC0100006891.hg.1         | -1.844966026 | 2.472534784 |
| ---           | TSUnmapped00000828.hg.1   | -1.844966026 | 2.472534784 |
| TRIM23        | TC0500010930.hg.1         | -1.843537377 | 2.472534784 |
| tusweyby      | TC0300012108.hg.1         | -1.841853524 | 2.472534784 |
| TTC1          | TC0500009268.hg.1         | -1.840578354 | 1.037101959 |
|               | HTA2-pos-PSR08004878.hg.1 | -1.835381537 | 3.845686185 |
| PLA2G16       | TC1100011126.hg.1         | -1.833797285 | 3.845686185 |
| ETFA          | TC1500010093.hg.1         | -1.832476885 | 0.407942629 |
| METTL22       | TC1600006822.hg.1         | -1.827688871 | 3.845686185 |
| SNORA70       | TC1900006951.hg.1         | -1.826025505 | 3.845686185 |
| PCCB          | TC0300008912.hg.1         | -1.825337619 | 2.472534784 |
|               | HTA2-pos-PSR19006630.hg.1 | -1.821959428 | 1.607801004 |
| WBP2          | TC1700011773.hg.1         | -1.820480348 | 2.472534784 |
| SNORA71D      | TC2000009073.hg.1         | -1.819750718 | 2.472534784 |
| SLFN11        | TC1700010420.hg.1         | -1.819354485 | 2.472534784 |
| ATP1B1        | TC0100010543.hg.1         | -1.817524737 | 3.845686185 |
| PRCP          | TC1100011794.hg.1         | -1.815884573 | 1.607801004 |
| STAU2         | TC0800012427.hg.1         | -1.815122185 | 1.607801004 |
| VIPAS39       | TC1400009784.hg.1         | -1.81217004  | 2.472534784 |
| TUBGCP4       | TC1500007057.hg.1         | -1.81211561  | 2.472534784 |
| ABCD4         | TC1400009690.hg.1         | -1.811832599 | 2.472534784 |
| GALNT1        | TC1800007080.hg.1         | -1.810429084 | 3.845686185 |
| CTD-2033A16.3 | TC1600008237.hg.1         | -1.807308555 | 3.845686185 |
| ZNF146        | TC1900007917.hg.1         | -1.80392997  | 2.472534784 |
| LOC440434     | TC1700010516.hg.1         | -1.802324977 | 1.607801004 |
| SLC2A3P1      | TC0500013398.hg.1         | -1.79993316  | 1.607801004 |
| TMEM161B-AS1  | TC0500008026.hg.1         | -1.799582925 | 1.607801004 |
| ---           | TSUnmapped00000951.hg.1   | -1.798817926 | 3.845686185 |
| HMG20A        | TC1500007939.hg.1         | -1.797174919 | 1.607801004 |
| PARD6A        | TC1600008169.hg.1         | -1.796247107 | 3.845686185 |
| NDST1         | TC0500009093.hg.1         | -1.795602695 | 2.472534784 |
| MRPS27        | TC0500011095.hg.1         | -1.795475334 | 1.607801004 |
| SSTR5-AS1     | TC1600009006.hg.1         | -1.79524397  | 1.037101959 |
| TBL1XR1       | TC0300013215.hg.1         | -1.794769203 | 3.845686185 |
| HOXA10-AS     | TC0700007005.hg.1         | -1.79400739  | 3.845686185 |
| C16orf62      | TC1600007113.hg.1         | -1.789312037 | 1.607801004 |
| FAM109B       | TC2200007508.hg.1         | -1.785238614 | 3.845686185 |
| FBXO22        | TC1500007912.hg.1         | -1.78402191  | 2.472534784 |
|               | HTA2-pos-PSR05010519.hg.1 | -1.781762444 | 1.607801004 |

|               |                           |              |             |
|---------------|---------------------------|--------------|-------------|
| farskor       | TC1700009524.hg.1         | -1.781292373 | 2.472534784 |
| ---           | TC1100011763.hg.1         | -1.776737131 | 3.845686185 |
|               | HTA2-pos-PSR05010526.hg.1 | -1.775422641 | 2.472534784 |
| ---           | TC1400008668.hg.1         | -1.772020343 | 2.472534784 |
| PICK1         | TC2200007331.hg.1         | -1.76844079  | 3.845686185 |
| FAM8A1        | TC0600007092.hg.1         | -1.768290535 | 3.845686185 |
| AHSA1         | TC1400007761.hg.1         | -1.765588535 | 2.472534784 |
| C14orf119     | TC1400006674.hg.1         | -1.76555794  | 1.607801004 |
|               | HTA2-pos-PSR19006627.hg.1 | -1.761992154 | 1.607801004 |
|               | HTA2-pos-2924323_st       | -1.757782619 | 3.845686185 |
| LOC202181     | TC0500012986.hg.1         | -1.756609182 | 2.472534784 |
| RP11-149F8.3  | TC0900007395.hg.1         | -1.756094319 | 2.472534784 |
| RN7SL671P     | TC0400009755.hg.1         | -1.755153549 | 2.472534784 |
| SMDT1         | TC2200009279.hg.1         | -1.750541989 | 2.472534784 |
| SMARCAL1      | TC0200010741.hg.1         | -1.748371783 | 2.472534784 |
| ---           | TC0700007761.hg.1         | -1.747094929 | 3.845686185 |
| ---           | TC0200016404.hg.1         | -1.743238845 | 3.845686185 |
| ---           | TC1100009513.hg.1         | -1.742797461 | 1.607801004 |
| SOX12         | TC2000006441.hg.1         | -1.740852938 | 3.845686185 |
| RBM12         | TC2000010007.hg.1         | -1.739730898 | 3.845686185 |
| ACO2          | TC2200007477.hg.1         | -1.737365948 | 2.472534784 |
| APPBP2        | TC1700011319.hg.1         | -1.734915022 | 1.037101959 |
| ---           | TC0700006895.hg.1         | -1.733639985 | 3.845686185 |
| NDUFA6        | TC2200008859.hg.1         | -1.732813835 | 1.037101959 |
| CAMLG         | TC0500008702.hg.1         | -1.73180821  | 2.472534784 |
| TAF9B         | TC0X00010136.hg.1         | -1.730503269 | 2.472534784 |
| MAT2B         | TC0500009321.hg.1         | -1.73039132  | 1.037101959 |
| TRAFD1        | TC1200008906.hg.1         | -1.726316312 | 3.845686185 |
| NHP2          | TC0500013010.hg.1         | -1.722938652 | 2.472534784 |
| ATXN10        | TC2200007626.hg.1         | -1.716894828 | 3.845686185 |
| PCIF1         | TC2000007512.hg.1         | -1.714440101 | 2.472534784 |
| C14orf166     | TC1400007155.hg.1         | -1.714161849 | 0.664908359 |
| ---           | TC1000009506.hg.1         | -1.712429092 | 3.845686185 |
| PPME1         | TC1100008409.hg.1         | -1.711243427 | 2.472534784 |
| ---           | TC1700011102.hg.1         | -1.70713561  | 3.845686185 |
| DCAF5         | TC1400009538.hg.1         | -1.706818911 | 2.472534784 |
| RP11-229E13.4 | TC1700007860.hg.1         | -1.706686805 | 3.845686185 |
| ZNF567        | TC1900007950.hg.1         | -1.701635555 | 1.607801004 |
| ILF3-AS1      | TC1900009641.hg.1         | -1.695365695 | 3.845686185 |
| SLC38A9       | TC0500010779.hg.1         | -1.693688135 | 3.845686185 |
| wayuro        | TC1100008551.hg.1         | -1.69085731  | 2.472534784 |

|          |                           |              |             |
|----------|---------------------------|--------------|-------------|
|          | HTA2-pos-3520361_st       | -1.69073142  | 2.472534784 |
| XPO7     | TC0800006963.hg.1         | -1.686615167 | 2.472534784 |
| TBCA     | TC0500011212.hg.1         | -1.685150566 | 1.607801004 |
| KLHL24   | TC0300009673.hg.1         | -1.685009918 | 2.472534784 |
| GLRX5    | TC1400008098.hg.1         | -1.682406894 | 1.607801004 |
| ---      | TC0800012141.hg.1         | -1.682300583 | 3.845686185 |
| KLHL23   | TC0200016563.hg.1         | -1.677856888 | 3.845686185 |
| SRP19    | TC0500013212.hg.1         | -1.652395649 | 3.845686185 |
| IPO8     | TC1200010264.hg.1         | -1.647706367 | 3.845686185 |
|          | HTA2-pos-PSR05010521.hg.1 | -1.647079281 | 2.472534784 |
| ZMAT2    | TC0500013238.hg.1         | -1.642912714 | 2.472534784 |
| CDY3P    | TC0Y00006998.hg.1         | -1.641990371 | 2.472534784 |
| IDH3G    | TC0X00011173.hg.1         | -1.631764094 | 3.845686185 |
| FUT8-AS1 | TC1400009449.hg.1         | -1.631566171 | 3.845686185 |
| ---      | TC0600011432.hg.1         | -1.630753152 | 2.472534784 |
| ---      | TSUnmapped00000847.hg.1   | -1.624907113 | 3.845686185 |
| TRAM1    | TC0800010765.hg.1         | -1.580537209 | 2.472534784 |



**Table SII. A total of 561 genes significantly impacted by SOX4 re-expression.**

| <b>Significant - positive</b> |                      |                    |                    |
|-------------------------------|----------------------|--------------------|--------------------|
| <b>Gene ID</b>                | <b>Probe ID</b>      | <b>Fold Change</b> | <b>q-value (%)</b> |
| LOC100505817                  | TC1800007655.hg.1    | 34.60823192        | 0                  |
| SOX4                          | TC0600007158.hg.1    | 30.47523977        | 0                  |
| ZFHX4-AS1                     | TC0800012431.hg.1    | 20.8106819         | 0                  |
| EDN1                          | TC0600006967.hg.1    | 20.56945028        | 2.27376244716355   |
| RGS4                          | TC0100010393.hg.1    | 19.70895893        | 1.31301775117895   |
| ANKRD1                        | TC1000011400.hg.1    | 18.27652646        | 0.793397960286857  |
| ---                           | TC0700008673.hg.1    | 18.14874228        | 0.582651627085661  |
| TRBV25-1                      | TC0700013479.hg.1    | 17.11391193        | 0                  |
| MFAP2                         | TC0100013071.hg.1    | 16.31863711        | 0                  |
|                               | HTA2-neg-47420566_st | 15.58510173        | 0                  |
| MEST                          | TC0700009145.hg.1    | 12.83282595        | 0                  |
| GRPR                          | TC0X00006686.hg.1    | 12.34483515        | 0                  |
| LYPD1                         | TC0200014361.hg.1    | 11.09380218        | 1.31301775117895   |
| TLE4                          | TC0900007680.hg.1    | 10.18814858        | 0                  |
| RASSF2                        | TC2000008267.hg.1    | 10.03625644        | 0                  |
| H19                           | TC1100009780.hg.1    | 9.254831135        | 4.2920930172056    |
| CYP2S1                        | TC1900008141.hg.1    | 8.586429464        | 0                  |
| PKP2                          | TC1200010341.hg.1    | 8.372696519        | 0                  |
| RP11-431J24.2                 | TC0X00009145.hg.1    | 8.014848962        | 0                  |
| MEX3B                         | TC1500010233.hg.1    | 7.926069769        | 0.582651627085661  |
| ---                           | TC0X00009147.hg.1    | 7.902075698        | 0                  |
| LBH                           | TC0200016424.hg.1    | 7.766527332        | 4.2920930172056    |
| 41701                         | TC0200015670.hg.1    | 7.437594016        | 0                  |
| kleylaw                       | TC0900007683.hg.1    | 7.334657843        | 0                  |
| RELN                          | TC0700012126.hg.1    | 7.20133476         | 4.2920930172056    |
| MKX                           | TC1000010132.hg.1    | 6.935199256        | 1.31301775117895   |
| CADM4                         | TC1900010855.hg.1    | 6.763846878        | 0                  |
| ---                           | TC0X00006693.hg.1    | 6.736394677        | 1.99562636799982   |
| RP11-80B9.1                   | TC0100012158.hg.1    | 6.175143516        | 4.2920930172056    |
| NETO1                         | TC1800009011.hg.1    | 6.110978195        | 1.31301775117895   |
| ---                           | TC0600008503.hg.1    | 5.891014075        | 0                  |
| MYB                           | TC0600009534.hg.1    | 5.829947938        | 0.793397960286857  |
| F2RL2                         | TC0500011194.hg.1    | 5.653666042        | 0.793397960286857  |
| DBN1                          | TC0500012975.hg.1    | 5.598628038        | 0                  |
| TEAD2                         | TC1900012000.hg.1    | 5.501475745        | 3.12134800224461   |
| SMO                           | TC0700009082.hg.1    | 5.492855476        | 0.582651627085661  |
|                               | HTA2-neg-47423235_st | 5.366262643        | 1.31301775117895   |
| berpoby                       | TC0700008994.hg.1    | 5.268530667        | 1.99562636799982   |

|            |                     |             |                   |
|------------|---------------------|-------------|-------------------|
| RNF122     | TC0800010081.hg.1   | 5.154682852 | 0.793397960286857 |
| PLCB4      | TC2000006674.hg.1   | 5.008661107 | 0.582651627085661 |
| CENPV      | TC1700009888.hg.1   | 4.913198975 | 1.31301775117895  |
| GP1BB      | TC2200006614.hg.1   | 4.86570549  | 0                 |
| CYFIP2     | TC0500009211.hg.1   | 4.788383383 | 0.582651627085661 |
| MCAM       | TC1100012520.hg.1   | 4.582719552 | 0.582651627085661 |
| SLC38A5    | TC0X00009611.hg.1   | 4.496546329 | 0.793397960286857 |
| MATN2      | TC0800008324.hg.1   | 4.480602265 | 3.12134800224461  |
| ---        | TC0300011888.hg.1   | 4.461266504 | 0.793397960286857 |
| ---        | TC0400011892.hg.1   | 4.385725954 | 3.12134800224461  |
| CD24       | TC0600012747.hg.1   | 4.379410442 | 0                 |
| ---        | TC0200015085.hg.1   | 4.351787166 | 0                 |
| FOXA1      | TC1400008981.hg.1   | 4.338394761 | 1.31301775117895  |
| DUSP1      | TC0500012842.hg.1   | 4.327658523 | 3.12134800224461  |
| TGIF2      | TC2000009914.hg.1   | 4.316361409 | 1.31301775117895  |
| BCAM       | TC1900008286.hg.1   | 4.243486242 | 3.12134800224461  |
| VASH2      | TC0100011552.hg.1   | 4.219568088 | 4.2920930172056   |
| AC097483.1 | TC0200010786.hg.1   | 4.170251329 | 4.2920930172056   |
| AC092057.1 | TC0300007532.hg.1   | 4.170251329 | 4.2920930172056   |
| AC022101.1 | TC0500008473.hg.1   | 4.170251329 | 4.2920930172056   |
| AC008514.1 | TC0500009410.hg.1   | 4.170251329 | 4.2920930172056   |
| AP004371.1 | TC1100009537.hg.1   | 4.170251329 | 4.2920930172056   |
| ZFH4       | TC0800008011.hg.1   | 4.166533751 | 0.582651627085661 |
| PSG9       | TC1900011967.hg.1   | 4.140920963 | 0.582651627085661 |
| CTXN1      | TC1900009510.hg.1   | 4.137494326 | 3.12134800224461  |
| ARMC4P1    | TC1000007096.hg.1   | 4.120658771 | 1.31301775117895  |
| BCL7A      | TC1200009192.hg.1   | 4.09356272  | 3.12134800224461  |
| SCARB1     | TC1200012327.hg.1   | 4.09312956  | 0                 |
| SERTAD2    | TC0200016679.hg.1   | 3.978154572 | 1.99562636799982  |
| RHOBTB1    | TC1000010737.hg.1   | 3.967944921 | 2.27376244716355  |
|            | HTA2-pos-3437243_st | 3.876892324 | 3.12134800224461  |
| DNMT3A     | TC0200016643.hg.1   | 3.871917823 | 3.12134800224461  |
| RBPMS2     | TC1500009756.hg.1   | 3.849607433 | 0.793397960286857 |
| 41698      | TC0100011665.hg.1   | 3.812203146 | 1.99562636799982  |
| FAM196B    | TC0500012775.hg.1   | 3.799439662 | 2.27376244716355  |
| LMO7       | TC1300009980.hg.1   | 3.780376698 | 1.31301775117895  |
| ADGRG6     | TC0600009669.hg.1   | 3.775569654 | 4.2920930172056   |
| KIAA1958   | TC0900008467.hg.1   | 3.771417847 | 0.793397960286857 |
| SMAD6      | TC1500007619.hg.1   | 3.706947458 | 3.12134800224461  |
| ID3        | TC0100013293.hg.1   | 3.666711268 | 4.2920930172056   |
| PSG6       | TC1900011963.hg.1   | 3.628934456 | 3.12134800224461  |

|               |                         |             |                   |
|---------------|-------------------------|-------------|-------------------|
| EPHB4         | TC0700012016.hg.1       | 3.606314791 | 1.99562636799982  |
| LOC101928161  | TC0200009393.hg.1       | 3.510756654 | 3.12134800224461  |
| PTGER4        | TC0500007231.hg.1       | 3.46415624  | 3.12134800224461  |
| LAYN          | TC1100009024.hg.1       | 3.455469312 | 2.27376244716355  |
| FLNC          | TC0700009066.hg.1       | 3.436222208 | 0.793397960286857 |
| HTR1D         | TC0100013272.hg.1       | 3.431253383 | 1.31301775117895  |
| FNBP1L        | TC0100009064.hg.1       | 3.409026939 | 2.27376244716355  |
| RAB3B         | TC0100014191.hg.1       | 3.389478532 | 4.2920930172056   |
| PPME1         | TC1100008409.hg.1       | 3.356932047 | 0.582651627085661 |
| LRRC8B        | TC0100008978.hg.1       | 3.351802942 | 1.31301775117895  |
| ZSCAN2        | TC1500008154.hg.1       | 3.335953857 | 0.793397960286857 |
| HNF1B         | TC1700010504.hg.1       | 3.321160243 | 1.31301775117895  |
| NFIL3         | TC0900010769.hg.1       | 3.315083785 | 2.27376244716355  |
| LOC105372290  | TC1900009890.hg.1       | 3.310819439 | 4.2920930172056   |
| SCDP1         | TC1700007240.hg.1       | 3.272656082 | 4.2920930172056   |
| PRKX          | TC0X00008945.hg.1       | 3.262440673 | 0.793397960286857 |
| ---           | TC1500007362.hg.1       | 3.24538957  | 1.99562636799982  |
| CTD-2561J22.5 | TC1900010144.hg.1       | 3.220854896 | 1.99562636799982  |
| ---           | TC0700010670.hg.1       | 3.206065722 | 4.2920930172056   |
| FZD3          | TC0800007137.hg.1       | 3.184249393 | 0.793397960286857 |
| DENND3        | TC0800009094.hg.1       | 3.182516513 | 1.31301775117895  |
| sheycher      | TC1300009057.hg.1       | 3.171529292 | 2.27376244716355  |
| RP11-2E11.9   | TC0700009150.hg.1       | 3.1698297   | 4.2920930172056   |
| ST3GAL5       | TC0200013298.hg.1       | 3.152950091 | 1.99562636799982  |
| CTD-2022H16.3 | TSUnmapped00000551.hg.1 | 3.104655086 | 4.2920930172056   |
| EEF1A2        | TC2000009813.hg.1       | 3.063079192 | 0.793397960286857 |
| NCS1          | TC0900008949.hg.1       | 3.027499385 | 1.99562636799982  |
|               | HTA2-neg-47422683_st    | 2.912431934 | 4.2920930172056   |
| ZNF483        | TC0900008425.hg.1       | 2.912137213 | 3.12134800224461  |
| CSRP2P        | TC0300012124.hg.1       | 2.895579284 | 0.582651627085661 |
| CCDC112       | TC0500011748.hg.1       | 2.89262038  | 4.2920930172056   |
| GARNL3        | TC0900012173.hg.1       | 2.882514769 | 0.793397960286857 |
| CTC-30107.4   | TC1900011999.hg.1       | 2.87879555  | 0.793397960286857 |
| ADARB1        | TC2100007402.hg.1       | 2.858265634 | 1.99562636799982  |
| EVL           | TC1400008193.hg.1       | 2.85417079  | 1.31301775117895  |
| CSRP2         | TC1200011327.hg.1       | 2.812409488 | 0.582651627085661 |
| SCD5          | TC0400011180.hg.1       | 2.804597361 | 4.2920930172056   |
| ATL1          | TC1400007120.hg.1       | 2.790828877 | 3.12134800224461  |
| PLEKHO1       | TC0100018288.hg.1       | 2.789875998 | 4.2920930172056   |
| RP11-397A15.4 | TC0100012283.hg.1       | 2.771504468 | 1.31301775117895  |
| LIFR          | TC0500010540.hg.1       | 2.769964205 | 2.27376244716355  |

|             |                      |             |                   |
|-------------|----------------------|-------------|-------------------|
| OTUD3       | TC0100007184.hg.1    | 2.765500622 | 1.31301775117895  |
| PTX3        | TC0300009301.hg.1    | 2.765301272 | 0.793397960286857 |
| RHOBTB3     | TC0500008125.hg.1    | 2.751378587 | 3.12134800224461  |
| C6orf132    | TC0600011817.hg.1    | 2.739172899 | 4.2920930172056   |
| ACAA2       | TC1800009289.hg.1    | 2.731550319 | 2.27376244716355  |
| TCF7L1      | TC0200008236.hg.1    | 2.717667582 | 3.12134800224461  |
| SOCS2-AS1   | TC1200011541.hg.1    | 2.693188109 | 1.31301775117895  |
| FAM171A1    | TC1000009884.hg.1    | 2.673543839 | 0.793397960286857 |
| F2R         | TC0500007831.hg.1    | 2.623303994 | 1.31301775117895  |
| MEX3A       | TC0100015985.hg.1    | 2.61368993  | 2.27376244716355  |
| ZNF730      | TC1900011697.hg.1    | 2.5935269   | 4.2920930172056   |
| CHN1        | TC0200015002.hg.1    | 2.548208511 | 1.99562636799982  |
| SOCS2       | TC1200008474.hg.1    | 2.546972413 | 2.27376244716355  |
| GAB2        | TC1100011744.hg.1    | 2.52447665  | 4.2920930172056   |
| NLE1        | TC1700010413.hg.1    | 2.520418551 | 1.99562636799982  |
| TMSB15A     | TC0X00010387.hg.1    | 2.490038991 | 2.27376244716355  |
| ZNF195      | TC1100009840.hg.1    | 2.474722341 | 1.31301775117895  |
| ---         | TC0800010322.hg.1    | 2.434274733 | 2.27376244716355  |
| CCNJ        | TC1000008529.hg.1    | 2.433229387 | 3.12134800224461  |
| RGS7        | TC0100017935.hg.1    | 2.392920278 | 4.2920930172056   |
| hutoya      | TC0700009326.hg.1    | 2.386225414 | 4.2920930172056   |
| BID         | TC2200007906.hg.1    | 2.371686521 | 4.2920930172056   |
| PRR3        | TC0600007534.hg.1    | 2.365397534 | 4.2920930172056   |
|             | HTA2-neg-47419832_st | 2.357989564 | 4.2920930172056   |
| H2BFXP      | TC0X00008023.hg.1    | 2.350898089 | 4.2920930172056   |
| FAM60BP     | TC1800008335.hg.1    | 2.346307336 | 3.12134800224461  |
| DCLK2       | TC0400008972.hg.1    | 2.335826849 | 1.31301775117895  |
| RP11-4C20.4 | TC1000009297.hg.1    | 2.326435195 | 3.12134800224461  |
| SORD        | TC1500007107.hg.1    | 2.323140915 | 4.2920930172056   |
| SORD2P      | TC1500009271.hg.1    | 2.210434523 | 4.2920930172056   |
| CLCF1       | TC1100013192.hg.1    | 2.187651606 | 3.12134800224461  |
| CCDC84      | TC1100009233.hg.1    | 2.183482043 | 4.2920930172056   |
| ---         | TC1900007623.hg.1    | 2.165950591 | 4.2920930172056   |
| PLIN2       | TC0900012212.hg.1    | 2.161399866 | 2.27376244716355  |
| LBR         | TC0100017488.hg.1    | 2.159698617 | 4.2920930172056   |
| CBX1P2      | TC0X00009166.hg.1    | 2.108979395 | 4.2920930172056   |
| DAGLB       | TC0700013509.hg.1    | 2.059530274 | 3.12134800224461  |
| ---         | TC0200012039.hg.1    | 2.048669602 | 4.2920930172056   |
| TET1        | TC1000007861.hg.1    | 2.007386845 | 4.2920930172056   |
| TXNRD1      | TC1200008675.hg.1    | 1.993674658 | 3.12134800224461  |
|             |                      |             |                   |

| <b>Significant - negative</b> |                   |                    |                    |
|-------------------------------|-------------------|--------------------|--------------------|
| <b>Gene ID</b>                | <b>Probe ID</b>   | <b>Fold change</b> | <b>q-value (%)</b> |
| C3                            | TC1900009443.hg.1 | -154.7735357       | 0                  |
| SLC14A1                       | TC1800007198.hg.1 | -86.26066901       | 0                  |
| ---                           | TC1900006814.hg.1 | -54.79931674       | 0                  |
| SLPI                          | TC2000009216.hg.1 | -45.08702248       | 0                  |
| STC1                          | TC0800009891.hg.1 | -38.39723889       | 0                  |
| ITGA11                        | TC1500009861.hg.1 | -35.12455396       | 0                  |
| CTSS                          | TC0100015752.hg.1 | -33.90806768       | 0                  |
| IL6                           | TC0700006890.hg.1 | -32.88452668       | 0.927604580434883  |
| BHLHE41                       | TC1200010182.hg.1 | -32.65297796       | 0                  |
| SIRPB1                        | TC2000009970.hg.1 | -31.66886666       | 0                  |
| TNFRSF11B                     | TC0800011611.hg.1 | -28.99905535       | 0.927604580434883  |
| IFI44L                        | TC0100008815.hg.1 | -28.47860683       | 0                  |
| SLC16A6                       | TC1700011558.hg.1 | -26.92650976       | 0                  |
| CXCL5                         | TC0400011014.hg.1 | -26.67205353       | 0                  |
| WNT5A                         | TC0300011247.hg.1 | -25.21837948       | 0                  |
| stawswu                       | TC0900008530.hg.1 | -24.85262495       | 0                  |
| TNC                           | TC0900011305.hg.1 | -24.13134349       | 0.651917904431509  |
| CD82                          | TC1100007394.hg.1 | -23.59947729       | 0                  |
| CSF3                          | TC1700007775.hg.1 | -22.83249059       | 0                  |
| PRLR                          | TC0500010480.hg.1 | -22.05171058       | 0                  |
| SEMA5A                        | TC0500010043.hg.1 | -21.15614212       | 1.99562636799982   |
| MX1                           | TC2100007208.hg.1 | -21.0774583        | 0                  |
| MMP1                          | TC1100012131.hg.1 | -18.91144023       | 0                  |
| ADAMTS9                       | TC0300011391.hg.1 | -17.27061238       | 0                  |
| TSPAN18                       | TC1100007400.hg.1 | -16.16090405       | 0.651917904431509  |
| WFDC2                         | TC2000007492.hg.1 | -16.04767068       | 0                  |
| SGPP2                         | TC0200010897.hg.1 | -14.86493243       | 2.27376244716355   |
| LPXN                          | TC1100010946.hg.1 | -14.30773106       | 0                  |
| DNER                          | TC0200015958.hg.1 | -14.22025075       | 0                  |
| SLITRK6                       | TC1300009394.hg.1 | -13.62973241       | 0                  |
| GLT8D2                        | TC1200011752.hg.1 | -13.02776774       | 0                  |
| SAMD9L                        | TC0700011797.hg.1 | -12.88632219       | 0                  |
| ADGRF1                        | TC0600011957.hg.1 | -11.98938429       | 0                  |
| C1S                           | TC1200012592.hg.1 | -11.72289782       | 3.12134800224461   |
| EDNRA                         | TC0400008943.hg.1 | -11.22627189       | 0.927604580434883  |
| IL1B                          | TC0200013916.hg.1 | -11.03560129       | 0                  |
| NTRK2                         | TC0900007752.hg.1 | -11.02260259       | 0.927604580434883  |
| IL1A                          | TC0200013913.hg.1 | -11.01939414       | 0.651917904431509  |
| NOV                           | TC0800008667.hg.1 | -10.97107254       | 0.927604580434883  |

|            |                   |              |                   |
|------------|-------------------|--------------|-------------------|
| PARM1      | TC0400007868.hg.1 | -10.60940615 | 0                 |
| VDR        | TC1200010559.hg.1 | -10.46185422 | 0.927604580434883 |
| TLR3       | TC0400009543.hg.1 | -10.41799444 | 0                 |
| SIRPD      | TC2000009969.hg.1 | -10.36716363 | 0                 |
| ---        | TC1000009600.hg.1 | -10.31897189 | 0.651917904431509 |
| BDKRB2     | TC1400010647.hg.1 | -10.31752718 | 4.2920930172056   |
| PTPRU      | TC0100007584.hg.1 | -10.12716179 | 0                 |
| IFI6       | TC0100013445.hg.1 | -10.06866148 | 0                 |
| MCTP1      | TC0500011483.hg.1 | -9.85067555  | 0                 |
| MLPH       | TC0200011251.hg.1 | -9.51435375  | 0                 |
| SLC37A2    | TC1100009408.hg.1 | -9.340574801 | 0                 |
| SNORD123   | TC0500006712.hg.1 | -8.965688236 | 0.651917904431509 |
| DUSP10     | TC0100017420.hg.1 | -8.818196751 | 0                 |
| GMFG       | TC1900010651.hg.1 | -8.799155088 | 0                 |
| PSMB9      | TC0600014110.hg.1 | -8.75505151  | 0                 |
| FEZ1       | TC1100012708.hg.1 | -8.743379382 | 0                 |
| RAB27B     | TC1800007360.hg.1 | -8.690087278 | 0                 |
| reniru     | TC2000008164.hg.1 | -8.346515341 | 0                 |
| CARD16     | TC1100013222.hg.1 | -8.134479301 | 0                 |
| HLA-B      | TC0600014258.hg.1 | -7.954518843 | 0                 |
| ---        | TC0X00011018.hg.1 | -7.903397664 | 1.99562636799982  |
| THBS2      | TC0600013998.hg.1 | -7.779556975 | 0                 |
| C1QTNF1    | TC1700009079.hg.1 | -7.728622677 | 2.27376244716355  |
| CASP1      | TC1100013221.hg.1 | -7.544648388 | 0                 |
| ASS1       | TC0900008953.hg.1 | -7.371621516 | 4.2920930172056   |
| CAMK2N1    | TC0100013182.hg.1 | -7.234500113 | 0                 |
| ADGRG1     | TC1600008005.hg.1 | -7.130006211 | 2.27376244716355  |
| SSX1       | TC0X00007176.hg.1 | -7.074420624 | 0                 |
| EVI2A      | TC1700010314.hg.1 | -6.960281555 | 0.927604580434883 |
| AOX1       | TC0200010421.hg.1 | -6.792429407 | 0                 |
| TLR6       | TC0400012922.hg.1 | -6.787321413 | 0.927604580434883 |
| CR1L       | TC0100011417.hg.1 | -6.779162249 | 0.651917904431509 |
| XAF1       | TC1700006709.hg.1 | -6.728615428 | 0                 |
| IL13RA2    | TC0X00010557.hg.1 | -6.721115362 | 0                 |
| KCNK3      | TC0200007042.hg.1 | -6.693236539 | 0.651917904431509 |
| BCL2A1     | TC1500010184.hg.1 | -6.55176828  | 0                 |
| TNFRSF9    | TC0100012734.hg.1 | -6.355575055 | 1.99562636799982  |
| SLIT2      | TC0400007016.hg.1 | -6.251138642 | 0.651917904431509 |
| AC003092.1 | TC0700008354.hg.1 | -6.249277191 | 0                 |
| CFH        | TC0100011064.hg.1 | -6.202765856 | 1.31301775117895  |
| MAL2       | TC0800008663.hg.1 | -6.157664794 | 2.27376244716355  |

|               |                   |              |                   |
|---------------|-------------------|--------------|-------------------|
| PRDM1         | TC0600008972.hg.1 | -6.138703546 | 3.12134800224461  |
| OAS2          | TC1200008921.hg.1 | -6.117562773 | 0.651917904431509 |
| BACE2         | TC2100007198.hg.1 | -6.06058196  | 0.651917904431509 |
| PCDH1         | TC0500012294.hg.1 | -6.054434998 | 0                 |
| STEAP1        | TC0700008292.hg.1 | -6.031375262 | 0                 |
| CNIH3         | TC0100018349.hg.1 | -6.025237041 | 0.927604580434883 |
| ---           | TC0300011389.hg.1 | -6.022566144 | 0                 |
| RP11-114H23.1 | TC1200011303.hg.1 | -5.928221419 | 0                 |
| KCND2         | TC0700008918.hg.1 | -5.918228229 | 1.31301775117895  |
| DPP4          | TC0200014764.hg.1 | -5.917287532 | 0                 |
| ---           | TC2000009329.hg.1 | -5.900531854 | 0                 |
| PTGS2         | TC0100016715.hg.1 | -5.868355754 | 0                 |
| GPAT3         | TC0400008007.hg.1 | -5.856959831 | 0.651917904431509 |
| FAM20C        | TC0700006445.hg.1 | -5.839156587 | 0.651917904431509 |
| AGTRAP        | TC0100006865.hg.1 | -5.767343695 | 0                 |
| FZD8          | TC1000010327.hg.1 | -5.752026544 | 0.927604580434883 |
| RP11-114H23.3 | TC1200011304.hg.1 | -5.735546671 | 0                 |
| PTPRM         | TC1800006589.hg.1 | -5.721592167 | 0                 |
| ZC3H12A       | TC0100007832.hg.1 | -5.684297251 | 0.927604580434883 |
| NRP2          | TC0200010545.hg.1 | -5.574613049 | 0                 |
| CLMP          | TC1100012615.hg.1 | -5.549412324 | 0                 |
| SLC16A2       | TC0X00007655.hg.1 | -5.520350997 | 0                 |
| PRSS12        | TC0400011685.hg.1 | -5.505739431 | 0                 |
| CD68          | TC1700012191.hg.1 | -5.502073199 | 0.927604580434883 |
| RIMS2         | TC0800008487.hg.1 | -5.471987748 | 0.927604580434883 |
| RP11-283G6.3  | TC1200010183.hg.1 | -5.427134513 | 0                 |
| APOBEC3G      | TC2200009274.hg.1 | -5.356253839 | 0.927604580434883 |
| EPSTI1        | TC1300008760.hg.1 | -5.351482707 | 0.927604580434883 |
| NTNG1         | TC0100009307.hg.1 | -5.340743756 | 2.27376244716355  |
| LAMB3         | TC0100017167.hg.1 | -5.333613683 | 0                 |
| LACC1         | TC1300009956.hg.1 | -5.303965287 | 0                 |
| IFI27         | TC1400008056.hg.1 | -5.295352288 | 0.651917904431509 |
| LOC105376382  | TC1000009674.hg.1 | -5.287072097 | 0.651917904431509 |
| CMPK2         | TC0200011624.hg.1 | -5.266813352 | 0                 |
| RUNX2         | TC0600008146.hg.1 | -5.24983956  | 0.651917904431509 |
| LAMA3         | TC1800006897.hg.1 | -5.224943126 | 0                 |
| NR1D1         | TC1700010604.hg.1 | -5.214070175 | 1.99562636799982  |
| IFI44         | TC0100008816.hg.1 | -5.205048717 | 0.927604580434883 |
| IFIH1         | TC0200014772.hg.1 | -5.187923958 | 2.27376244716355  |
| MTSS1         | TC0800011713.hg.1 | -5.16911154  | 0                 |
| NR2F1-AS1     | TC0500011464.hg.1 | -5.060617146 | 0                 |

|               |                   |              |                   |
|---------------|-------------------|--------------|-------------------|
| SEL1L3        | TC0400010282.hg.1 | -5.025555244 | 1.31301775117895  |
| CYP4F11       | TC1900009896.hg.1 | -5.003227312 | 0                 |
| OAS1          | TC1200012708.hg.1 | -4.988374112 | 0.927604580434883 |
| CXCL1         | TC0400007840.hg.1 | -4.979957166 | 4.2920930172056   |
| ---           | TC0900008601.hg.1 | -4.96236894  | 2.27376244716355  |
| KYNU          | TC0200009537.hg.1 | -4.937859088 | 0.927604580434883 |
| EPHA4         | TC0200015815.hg.1 | -4.873789696 | 1.99562636799982  |
| IRAK3         | TC1200008057.hg.1 | -4.864445407 | 1.99562636799982  |
| PMEPA1        | TC2000009604.hg.1 | -4.763691545 | 4.2920930172056   |
| LINC00704     | TC1000009642.hg.1 | -4.728458714 | 0.651917904431509 |
| CXCL6         | TC0400012814.hg.1 | -4.689614498 | 3.12134800224461  |
| PSMB8-AS1     | TC0600014109.hg.1 | -4.671800495 | 0                 |
| CDR1          | TC0X00008596.hg.1 | -4.65676044  | 2.27376244716355  |
| ---           | TC2000009931.hg.1 | -4.557135707 | 0                 |
| IRAK2         | TC0300006580.hg.1 | -4.544743901 | 0                 |
| OSBPL6        | TC0200016571.hg.1 | -4.542692549 | 0                 |
| APOL3         | TC2200008588.hg.1 | -4.530028102 | 0.651917904431509 |
| TFPI2         | TC0700011809.hg.1 | -4.514720473 | 1.31301775117895  |
| CYB5R2        | TC1100010003.hg.1 | -4.503989092 | 0.651917904431509 |
| PROX1         | TC0100011566.hg.1 | -4.491378582 | 0                 |
| CSTA          | TC0300008550.hg.1 | -4.451465373 | 0.927604580434883 |
| ---           | TC1900011214.hg.1 | -4.450466804 | 0                 |
| AIM1          | TC0600008981.hg.1 | -4.426204168 | 1.31301775117895  |
| TPK1          | TC0700012917.hg.1 | -4.415715835 | 0                 |
| PPP4R4        | TC1400008058.hg.1 | -4.385510122 | 0.651917904431509 |
| MVP           | TC1600011378.hg.1 | -4.369404489 | 0.651917904431509 |
| STEAP2        | TC0700008293.hg.1 | -4.360839823 | 1.31301775117895  |
| RP11-752L20.3 | TC0400008944.hg.1 | -4.351993293 | 3.12134800224461  |
| UBE2L6        | TC1100010897.hg.1 | -4.338059978 | 0.927604580434883 |
| SNORA70       | TC1200011305.hg.1 | -4.298510012 | 0.651917904431509 |
| PPP1R14C      | TC0600009831.hg.1 | -4.254693874 | 0.927604580434883 |
| XDH           | TC0200012163.hg.1 | -4.21040788  | 0.651917904431509 |
| SH3PXD2A      | TC1000011726.hg.1 | -4.208104894 | 0.927604580434883 |
| IFIT3         | TC1000008397.hg.1 | -4.196369356 | 2.27376244716355  |
| IRF9          | TC1400010584.hg.1 | -4.189957664 | 0.651917904431509 |
| UBA7          | TC0300011081.hg.1 | -4.184205378 | 0                 |
| HIVEP2        | TC0600013409.hg.1 | -4.165846459 | 0.651917904431509 |
| LPCAT2        | TC1600007931.hg.1 | -4.152454423 | 0.651917904431509 |
| HLA-J         | TC0600007502.hg.1 | -4.148730663 | 1.31301775117895  |
| IL31RA        | TC0500007432.hg.1 | -4.135283771 | 2.27376244716355  |
| CADPS2        | TC0700012444.hg.1 | -4.102303793 | 2.27376244716355  |



|               |                   |              |                   |
|---------------|-------------------|--------------|-------------------|
| BTN3A2        | TC0600007301.hg.1 | -4.081927806 | 3.12134800224461  |
| ATP2B4        | TC0100011267.hg.1 | -4.072857485 | 4.2920930172056   |
| SPTLC3        | TC2000006736.hg.1 | -4.022289718 | 0.651917904431509 |
| STEAP1B       | TC0700010443.hg.1 | -4.007269857 | 0.927604580434883 |
| CXCL3         | TC0400011015.hg.1 | -3.984942756 | 3.12134800224461  |
| RP11-100E13.1 | TC0100017474.hg.1 | -3.974464063 | 2.27376244716355  |
| ADTRP         | TC0600010825.hg.1 | -3.963853565 | 1.31301775117895  |
| RORA          | TC1500009641.hg.1 | -3.918505893 | 0.651917904431509 |
| KIAA0040      | TC0100016476.hg.1 | -3.918237008 | 1.99562636799982  |
| DDX60         | TC0400012366.hg.1 | -3.914087478 | 4.2920930172056   |
| KIAA1217      | TC1000007024.hg.1 | -3.905516439 | 0.927604580434883 |
| HLA-C         | TC0600014257.hg.1 | -3.859599097 | 0                 |
| PREX1         | TC2000009357.hg.1 | -3.858793924 | 0.927604580434883 |
| AIM2          | TC0100016086.hg.1 | -3.858193944 | 1.99562636799982  |
| SQRDL         | TC1500010737.hg.1 | -3.842150416 | 0.651917904431509 |
| sugyby        | TC1100006732.hg.1 | -3.818960505 | 0.651917904431509 |
| RFX8          | TC0200013669.hg.1 | -3.817518989 | 0.651917904431509 |
| CLEC2B        | TC1200009881.hg.1 | -3.816120339 | 0.651917904431509 |
| IL4R          | TC1600007312.hg.1 | -3.810310764 | 0.651917904431509 |
| POPDC3        | TC0600012709.hg.1 | -3.799992752 | 0                 |
| C10orf11      | TC1000008099.hg.1 | -3.798441669 | 0.927604580434883 |
| INHBA         | TC0700010854.hg.1 | -3.795000301 | 0                 |
| CTD-2033D15.1 | TC1500009071.hg.1 | -3.791537521 | 4.2920930172056   |
| SOD2          | TC0600013757.hg.1 | -3.791231799 | 0.651917904431509 |
| FAM198B       | TC0400012245.hg.1 | -3.773827118 | 0.651917904431509 |
| SETBP1        | TC1800007186.hg.1 | -3.752495478 | 2.27376244716355  |
| PRRG4         | TC1100007216.hg.1 | -3.726682728 | 0.651917904431509 |
| TMEM246       | TC0900011035.hg.1 | -3.721987818 | 0                 |
| MYO1D         | TC1700010358.hg.1 | -3.710751353 | 0                 |
| HLA-F         | TC0600007480.hg.1 | -3.701789005 | 0                 |
| MMP14         | TC1400006659.hg.1 | -3.700602046 | 3.12134800224461  |
| ATP2B1        | TC1200011474.hg.1 | -3.699524877 | 3.12134800224461  |
| LINC00973     | TC0300008123.hg.1 | -3.695842644 | 0                 |
| RGCC          | TC1300006979.hg.1 | -3.695225311 | 0.651917904431509 |
| GBP2          | TC0100018451.hg.1 | -3.663731217 | 1.31301775117895  |
| TK2           | TC1600011551.hg.1 | -3.663122633 | 1.99562636799982  |
| TRANK1        | TC0300010714.hg.1 | -3.658364099 | 4.2920930172056   |
| CCDC122       | TC1300008772.hg.1 | -3.653592331 | 3.12134800224461  |
| CLGN          | TC0400011973.hg.1 | -3.645707963 | 0                 |
| APOBEC3D      | TC2200009272.hg.1 | -3.637606112 | 2.27376244716355  |
| starawbo      | TC0100013053.hg.1 | -3.637540556 | 4.2920930172056   |

|               |                      |              |                   |
|---------------|----------------------|--------------|-------------------|
| TBX3          | TC1200012016.hg.1    | -3.633055319 | 0.927604580434883 |
| GBP1          | TC0100014852.hg.1    | -3.623265855 | 4.2920930172056   |
| ITGB3         | TC1700012274.hg.1    | -3.6188024   | 4.2920930172056   |
| GALNT5        | TC0200009739.hg.1    | -3.614038813 | 2.27376244716355  |
| RIPK4         | TC2100008222.hg.1    | -3.601479436 | 4.2920930172056   |
| TMOD1         | TC0900008150.hg.1    | -3.589540893 | 4.2920930172056   |
| PSMB8         | TC0600011507.hg.1    | -3.564188568 | 0.927604580434883 |
| GOS2          | TC0100011453.hg.1    | -3.556266234 | 0.927604580434883 |
| ACSL5         | TC1000008926.hg.1    | -3.550420739 | 1.99562636799982  |
| MCOLN3        | TC0100014769.hg.1    | -3.534188525 | 0.651917904431509 |
| LAMA4         | TC0600012885.hg.1    | -3.526720719 | 0                 |
| NPAS2         | TC0200008627.hg.1    | -3.508943375 | 0                 |
| SIRPA         | TC2000006501.hg.1    | -3.48892681  | 4.2920930172056   |
| MME           | TC0300009258.hg.1    | -3.484983116 | 2.27376244716355  |
| TMEM229B      | TC1400010763.hg.1    | -3.481133158 | 0                 |
| USP41         | TC2200008036.hg.1    | -3.471168341 | 0.927604580434883 |
| NLRP3         | TC0100012315.hg.1    | -3.457241378 | 2.27376244716355  |
|               | HTA2-neg-47422252_st | -3.450860928 | 2.27376244716355  |
| IFI16         | TC0100010244.hg.1    | -3.4363413   | 0                 |
| ABTB2         | TC1100010505.hg.1    | -3.421969734 | 3.12134800224461  |
| CD83          | TC0600007012.hg.1    | -3.418916054 | 3.12134800224461  |
| GBP1P1        | TC0100008977.hg.1    | -3.406549885 | 4.2920930172056   |
| CTSO          | TC0400012213.hg.1    | -3.405930509 | 0.651917904431509 |
| SDC4          | TC2000009218.hg.1    | -3.387763899 | 2.27376244716355  |
| ABLIM3        | TC0500009055.hg.1    | -3.384028378 | 0.927604580434883 |
| ---           | TC0200008928.hg.1    | -3.367409873 | 0.651917904431509 |
| HOMER2        | TC1500010251.hg.1    | -3.354660261 | 0.927604580434883 |
| RNU6-917P     | TC2000008163.hg.1    | -3.352858658 | 4.2920930172056   |
| ABCA6         | TC1700011578.hg.1    | -3.347939986 | 0.927604580434883 |
| PAG1          | TC0800010926.hg.1    | -3.330535901 | 0                 |
| ALDH1A3       | TC1500010800.hg.1    | -3.316634424 | 0.927604580434883 |
| RP11-114H23.2 | TC1200011306.hg.1    | -3.302033294 | 0.651917904431509 |
| QPCT          | TC0200007261.hg.1    | -3.249742332 | 0.927604580434883 |
| ---           | TC0400007268.hg.1    | -3.239082019 | 0.927604580434883 |
| GPRC5C        | TC1700008851.hg.1    | -3.238270869 | 3.12134800224461  |
| IL1R1         | TC0200008666.hg.1    | -3.229644417 | 1.31301775117895  |
| CXCL10        | TC0400011053.hg.1    | -3.225930447 | 2.27376244716355  |
| CD69          | TC1200009876.hg.1    | -3.224545887 | 0                 |
| ERAP1         | TC0500013342.hg.1    | -3.21486168  | 1.31301775117895  |
| RP11-7F17.7   | TC1400007740.hg.1    | -3.202761421 | 0.651917904431509 |
| TPP1          | TC1100009981.hg.1    | -3.197571605 | 0.927604580434883 |

|                 |                   |              |                   |
|-----------------|-------------------|--------------|-------------------|
| CCL20           | TC0200010980.hg.1 | -3.188503946 | 1.31301775117895  |
| ANKH            | TC0500010169.hg.1 | -3.184100781 | 4.2920930172056   |
| HES1            | TC0300009916.hg.1 | -3.181465183 | 4.2920930172056   |
| SOGA3           | TC0600013119.hg.1 | -3.173129351 | 1.31301775117895  |
| DDX60L          | TC0400012990.hg.1 | -3.169295836 | 2.27376244716355  |
| TRIML2          | TC0400012696.hg.1 | -3.138032585 | 4.2920930172056   |
| CD109           | TC0600008539.hg.1 | -3.1373359   | 1.99562636799982  |
| ETV1            | TC0700010321.hg.1 | -3.134032194 | 2.27376244716355  |
| TAPBPL          | TC1200012584.hg.1 | -3.128092121 | 0.927604580434883 |
| PLA2G4A         | TC0100010939.hg.1 | -3.119980474 | 2.27376244716355  |
| CXCL2           | TC0400011018.hg.1 | -3.108714943 | 1.31301775117895  |
| RP5-875H18.9    | TC1700008231.hg.1 | -3.100149237 | 1.99562636799982  |
| TNIP1           | TC0500012497.hg.1 | -3.096500474 | 4.2920930172056   |
| ---             | TC0600009216.hg.1 | -3.078614728 | 3.12134800224461  |
| RRAS            | TC1900011153.hg.1 | -3.075089357 | 0.927604580434883 |
| PHF11           | TC1300007167.hg.1 | -3.071457314 | 0.927604580434883 |
| TGFBR2          | TC0300006925.hg.1 | -3.063880438 | 0                 |
| FAM174B         | TC1500010929.hg.1 | -3.06256543  | 1.99562636799982  |
| GNG11           | TC0700008351.hg.1 | -3.062460706 | 3.12134800224461  |
| RP11-5G9.5      | TC1300008774.hg.1 | -3.030897367 | 1.99562636799982  |
| CEACAM1         | TC1900010807.hg.1 | -3.01449569  | 2.27376244716355  |
| SORBS1          | TC1000011487.hg.1 | -3.01288582  | 3.12134800224461  |
| FAS             | TC1000008388.hg.1 | -3.006086799 | 0.927604580434883 |
| CFAP206         | TC0600014153.hg.1 | -3.005602039 | 0.651917904431509 |
| APOL1           | TC2200007242.hg.1 | -3.004791735 | 0.651917904431509 |
| PHACTR1         | TC0600006976.hg.1 | -2.997393165 | 0.927604580434883 |
| ---             | TC2000007868.hg.1 | -2.996723549 | 3.12134800224461  |
| P2RY2           | TC1100008378.hg.1 | -2.982607217 | 0.927604580434883 |
| ATP10D          | TC0400007422.hg.1 | -2.968457244 | 4.2920930172056   |
| ARHGAP24        | TC0400008030.hg.1 | -2.966963133 | 1.31301775117895  |
| SNAI2           | TC0800010382.hg.1 | -2.961674997 | 3.12134800224461  |
| EPHB1           | TC0300013877.hg.1 | -2.961139929 | 1.99562636799982  |
| C5orf56andRAD50 | TC0500008636.hg.1 | -2.961032516 | 2.27376244716355  |
| MAP3K5          | TC0600013280.hg.1 | -2.956496017 | 4.2920930172056   |
| RBM47           | TC0400010500.hg.1 | -2.949874001 | 0.927604580434883 |
| ELF1            | TC1300008708.hg.1 | -2.947221178 | 2.27376244716355  |
| ADIRF           | TC1000012471.hg.1 | -2.945351194 | 1.99562636799982  |
| SATB1           | TC0300013949.hg.1 | -2.922362204 | 3.12134800224461  |
| MAN1A1          | TC0600013010.hg.1 | -2.903634776 | 0                 |
| PRKG2           | TC0400011159.hg.1 | -2.901666404 | 0.927604580434883 |
| C1orf21         | TC0100010887.hg.1 | -2.89193742  | 1.31301775117895  |

|              |                   |              |                   |
|--------------|-------------------|--------------|-------------------|
| ACKR4        | TC0300008847.hg.1 | -2.867665334 | 3.12134800224461  |
| kuchoybu     | TC0700010064.hg.1 | -2.855411492 | 1.99562636799982  |
| blargor      | TC0500011872.hg.1 | -2.849578757 | 1.31301775117895  |
| PTPRJ        | TC1100007507.hg.1 | -2.840201593 | 0.651917904431509 |
| TMX4         | TC2000008345.hg.1 | -2.832723916 | 0                 |
| POLD4        | TC1100013191.hg.1 | -2.787884257 | 4.2920930172056   |
| TMEM51       | TC0100006977.hg.1 | -2.785590137 | 0.927604580434883 |
| ICA1         | TC0700010257.hg.1 | -2.775848826 | 0.927604580434883 |
| HTR7         | TC1000011398.hg.1 | -2.75939757  | 0.927604580434883 |
| CHPF         | TC0200015790.hg.1 | -2.754295468 | 3.12134800224461  |
| DSE          | TC0600014177.hg.1 | -2.734369734 | 1.99562636799982  |
| RP11-20B7.1  | TC0300007852.hg.1 | -2.714266415 | 1.31301775117895  |
| TMEM255B     | TC1300010007.hg.1 | -2.689522391 | 2.27376244716355  |
| FLT3LG       | TC1900011779.hg.1 | -2.669586569 | 0.927604580434883 |
| SNTB1        | TC0800011634.hg.1 | -2.665358635 | 3.12134800224461  |
| PER3         | TC0100006725.hg.1 | -2.662732189 | 4.2920930172056   |
| TFAP2C       | TC2000007830.hg.1 | -2.657126046 | 1.99562636799982  |
| NRP1         | TC1000010273.hg.1 | -2.627984318 | 1.31301775117895  |
| SERPINA1     | TC1400010045.hg.1 | -2.627723238 | 3.12134800224461  |
| LAPTM5       | TC0100013534.hg.1 | -2.627365054 | 1.31301775117895  |
| ---          | TC0400009594.hg.1 | -2.615018827 | 2.27376244716355  |
| glornoby     | TC1000011013.hg.1 | -2.6134822   | 1.99562636799982  |
| ---          | TC0900008537.hg.1 | -2.599042094 | 1.99562636799982  |
| LRP10        | TC1400006663.hg.1 | -2.589170551 | 0.927604580434883 |
| TSPAN13      | TC0700006783.hg.1 | -2.588398955 | 1.99562636799982  |
| FAM167A      | TC0800009600.hg.1 | -2.585323233 | 1.31301775117895  |
| fyslabu      | TC0800010706.hg.1 | -2.574738653 | 3.12134800224461  |
| SCN1B        | TC1900007830.hg.1 | -2.559805745 | 3.12134800224461  |
| C4orf33      | TC0400008686.hg.1 | -2.549302664 | 3.12134800224461  |
| USP18        | TC2200006540.hg.1 | -2.535726828 | 1.99562636799982  |
| ATL3         | TC1100011128.hg.1 | -2.534702921 | 1.99562636799982  |
| EPAS1        | TC0200007458.hg.1 | -2.531261692 | 0.927604580434883 |
| ---          | TC1000006540.hg.1 | -2.530165344 | 3.12134800224461  |
| ITGA2        | TC0500007368.hg.1 | -2.526289545 | 0.927604580434883 |
| ZC3H12C      | TC1100008999.hg.1 | -2.525945188 | 1.99562636799982  |
| HMG5         | TC0X00010172.hg.1 | -2.521055712 | 2.27376244716355  |
| F8           | TC0X00011226.hg.1 | -2.520300338 | 1.99562636799982  |
| RHOJ         | TC1400007404.hg.1 | -2.515259644 | 3.12134800224461  |
| KB-1027C11.4 | TC2200008108.hg.1 | -2.512879805 | 2.27376244716355  |
| TAPBP        | TC0600011536.hg.1 | -2.498097871 | 4.2920930172056   |
| TSC22D1      | TC1300008793.hg.1 | -2.495207856 | 4.2920930172056   |

|              |                   |              |                   |
|--------------|-------------------|--------------|-------------------|
| CD58         | TC0100015397.hg.1 | -2.492925899 | 1.31301775117895  |
| FAM225A      | TC0900008481.hg.1 | -2.490885432 | 4.2920930172056   |
| MPZL2        | TC1100012474.hg.1 | -2.479815866 | 4.2920930172056   |
| CTBS         | TC0100014755.hg.1 | -2.471276324 | 2.27376244716355  |
| PPP3CB-AS1   | TC1000008032.hg.1 | -2.468395666 | 4.2920930172056   |
| POF1B        | TC0X00010207.hg.1 | -2.463035918 | 0.927604580434883 |
| PARP3        | TC0300007454.hg.1 | -2.451999469 | 1.31301775117895  |
| AGAP2        | TC1200010976.hg.1 | -2.449878158 | 0.651917904431509 |
| EMP1         | TC1200006909.hg.1 | -2.435936738 | 3.12134800224461  |
| zarvo        | TC1400008679.hg.1 | -2.428384158 | 3.12134800224461  |
| DTX3L        | TC0300008558.hg.1 | -2.426908977 | 3.12134800224461  |
| FOXF1        | TC1600008735.hg.1 | -2.426244597 | 4.2920930172056   |
| NFKBIA       | TC1400008940.hg.1 | -2.4257093   | 4.2920930172056   |
| TESPA1       | TC1200010850.hg.1 | -2.421906775 | 2.27376244716355  |
| EIF5A2       | TC0300013104.hg.1 | -2.400586076 | 0.927604580434883 |
| PPIC         | TC0500011875.hg.1 | -2.392805834 | 1.31301775117895  |
| RTP4         | TC0300009799.hg.1 | -2.392227065 | 3.12134800224461  |
| ZBTB38       | TC0300008999.hg.1 | -2.390302709 | 0.651917904431509 |
| SLC20A1      | TC0200008930.hg.1 | -2.381719202 | 0.927604580434883 |
| MST1R        | TC0300011088.hg.1 | -2.379082003 | 1.99562636799982  |
| ---          | TC0Y00006647.hg.1 | -2.369492345 | 3.12134800224461  |
| TTC39B       | TC0900012209.hg.1 | -2.36640335  | 3.12134800224461  |
| TAP1         | TC0600011508.hg.1 | -2.357591885 | 4.2920930172056   |
| SFR1         | TC1000008798.hg.1 | -2.334629043 | 3.12134800224461  |
| RP11-53M11.3 | TC0800007664.hg.1 | -2.331234823 | 4.2920930172056   |
| MAP9         | TC0400012193.hg.1 | -2.327607823 | 4.2920930172056   |
| C11orf63     | TC1100009335.hg.1 | -2.32163472  | 2.27376244716355  |
| TRPV4        | TC1200011882.hg.1 | -2.315504135 | 2.27376244716355  |
| ARSD         | TC0X00011338.hg.1 | -2.309378    | 3.12134800224461  |
| CYBA         | TC1600011220.hg.1 | -2.307440319 | 2.27376244716355  |
| MAN2B2       | TC0400006689.hg.1 | -2.296340638 | 3.12134800224461  |
| ---          | TC0900012208.hg.1 | -2.292420972 | 1.31301775117895  |
| COPZ2        | TC1700010973.hg.1 | -2.292029056 | 1.99562636799982  |
| SLFN5        | TC1700007585.hg.1 | -2.263564892 | 3.12134800224461  |
| PKD2         | TC0400008093.hg.1 | -2.232969171 | 2.27376244716355  |
| CPQ          | TC0800008300.hg.1 | -2.232919127 | 2.27376244716355  |
| ATP8B1       | TC1800009233.hg.1 | -2.217154541 | 3.12134800224461  |
| SP100        | TC0200011023.hg.1 | -2.200092224 | 1.99562636799982  |
| TSPAN4       | TC1100006495.hg.1 | -2.198358488 | 2.27376244716355  |
| VPS9D1       | TC1600011290.hg.1 | -2.165057989 | 3.12134800224461  |
| ---          | TC0800006742.hg.1 | -2.161059309 | 4.2920930172056   |

|               |                   |              |                   |
|---------------|-------------------|--------------|-------------------|
| OAS3          | TC1200008920.hg.1 | -2.159924175 | 3.12134800224461  |
| LY6E          | TC0800012371.hg.1 | -2.158715817 | 2.27376244716355  |
| STAT2         | TC1200010908.hg.1 | -2.152268398 | 4.2920930172056   |
| ---           | TC0700010706.hg.1 | -2.131398962 | 2.27376244716355  |
| HLA-L         | TC0600007518.hg.1 | -2.130462513 | 1.99562636799982  |
| FOXO1         | TC1300008688.hg.1 | -2.111912408 | 2.27376244716355  |
| PDE4DIP       | TC0100009837.hg.1 | -2.1064534   | 3.12134800224461  |
| KCNAB2        | TC0100006675.hg.1 | -2.097048168 | 3.12134800224461  |
| LACTB2        | TC0800010766.hg.1 | -2.09477748  | 3.12134800224461  |
| runiyo        | TC0200008931.hg.1 | -2.077297721 | 4.2920930172056   |
| FBXO8         | TC0400012452.hg.1 | -2.063315348 | 1.99562636799982  |
| OTUB2         | TC1400008054.hg.1 | -2.050206177 | 4.2920930172056   |
| ---           | TC0800010259.hg.1 | -2.045955358 | 0.927604580434883 |
| nirime        | TC0600008620.hg.1 | -2.044838163 | 4.2920930172056   |
| MDFIC         | TC0700008857.hg.1 | -2.032077371 | 2.27376244716355  |
| ---           | TC1100006741.hg.1 | -2.028560504 | 4.2920930172056   |
| SLC37A1       | TC2100008527.hg.1 | -2.017080973 | 4.2920930172056   |
| ANG           | TC1400006529.hg.1 | -2.015265614 | 2.27376244716355  |
| ZHX3          | TC2000009128.hg.1 | -2.013859916 | 2.27376244716355  |
| RP11-802E16.3 | TC1100013058.hg.1 | -2.013293725 | 2.27376244716355  |
| ---           | TC0400012658.hg.1 | -2.006509982 | 3.12134800224461  |
| smufla        | TC0600014184.hg.1 | -2.003670575 | 3.12134800224461  |
| spoyber       | TC0100015059.hg.1 | -1.983118655 | 2.27376244716355  |
| SEMA3D        | TC0700011675.hg.1 | -1.976111931 | 4.2920930172056   |
| MAGEC2        | TC0X00011001.hg.1 | -1.935215192 | 1.99562636799982  |
| WSCD1         | TC1700012177.hg.1 | -1.934961686 | 4.2920930172056   |
| TMEM219       | TC1600011380.hg.1 | -1.912495916 | 2.27376244716355  |
| PDGFC         | TC0400012222.hg.1 | -1.840136345 | 3.12134800224461  |
| CTSB          | TC0800009619.hg.1 | -1.832821982 | 4.2920930172056   |
| RNU7-13P      | TC0100016679.hg.1 | -1.829343924 | 3.12134800224461  |
| FAM129B       | TC0900011582.hg.1 | -1.817115344 | 4.2920930172056   |
| B2M           | TC1500007097.hg.1 | -1.751328842 | 4.2920930172056   |
| C1orf101      | TC0100012221.hg.1 | -1.735872517 | 3.12134800224461  |
| CHPT1         | TC1200012698.hg.1 | -1.704478025 | 3.12134800224461  |

**Table SIII. A total of 173 high-confidence genes regulated in opposite directions by SOX4 knockdown and SOX4 re-expression.**

| Gene name     | Probe ID                | Fold change SOX4-KD vs SCR | q-value (%) | Fold change SOX4-Rescue vs SOX4-KD |
|---------------|-------------------------|----------------------------|-------------|------------------------------------|
| LYPD1         | TC0200014361.hg.1       | -23.0266266                | 0           | 11.09380218                        |
| ZFHX4-AS1     | TC0800012431.hg.1       | -17.23853179               | 0           | 20.8106819                         |
| PKP2          | TC1200010341.hg.1       | -15.58371723               | 0           | 8.372696519                        |
| FOXA1         | TC1400008981.hg.1       | -14.35617325               | 0           | 4.338394761                        |
| SCDP1         | TC1700007240.hg.1       | -11.33267211               | 0           | 3.272656082                        |
| LOC101928161  | TC0200009393.hg.1       | -10.1967854                | 0.333076753 | 3.510756654                        |
| HTR1D         | TC0100013272.hg.1       | -9.691857324               | 0           | 3.431253383                        |
| RBPMS2        | TC1500009756.hg.1       | -8.579926764               | 0           | 3.849607433                        |
| RGS4          | TC0100010393.hg.1       | -8.264178028               | 1.607801004 | 19.70895893                        |
| DUSP1         | TC0500012842.hg.1       | -6.341829832               | 0.333076753 | 4.327658523                        |
| CYFIP2        | TC0500009211.hg.1       | -5.227514227               | 0           | 4.788383383                        |
| SCD5          | TC0400011180.hg.1       | -4.753833913               | 0           | 2.804597361                        |
| MEST          | TC0700009145.hg.1       | -4.588190629               | 0.333076753 | 12.83282595                        |
| ADGRG6        | TC0600009669.hg.1       | -4.249182084               | 0.333076753 | 3.775569654                        |
| RASSF2        | TC2000008267.hg.1       | -4.057536295               | 0           | 10.03625644                        |
| SMAD6         | TC1500007619.hg.1       | -4.014352346               | 0           | 3.706947458                        |
| TLE4          | TC0900007680.hg.1       | -3.588439672               | 0           | 10.18814858                        |
| RNF122        | TC0800010081.hg.1       | -3.375607506               | 0.333076753 | 5.154682852                        |
| SCARB1        | TC1200012327.hg.1       | -3.367382642               | 0           | 4.09312956                         |
| RP11-80B9.1   | TC0100012158.hg.1       | -3.179099674               | 0.333076753 | 6.175143516                        |
| NETO1         | TC1800009011.hg.1       | -3.150802517               | 3.845686185 | 6.110978195                        |
| EVL           | TC1400008193.hg.1       | -2.867143607               | 0.407942629 | 2.85417079                         |
| GP1BB         | TC2200006614.hg.1       | -2.824292806               | 1.037101959 | 4.86570549                         |
| CYP2S1        | TC1900008141.hg.1       | -2.820970019               | 1.037101959 | 8.586429464                        |
| kleylaw       | TC0900007683.hg.1       | -2.583232804               | 1.037101959 | 7.334657843                        |
| PTGER4        | TC0500007231.hg.1       | -2.566190016               | 1.607801004 | 3.46415624                         |
| ZFHX4         | TC0800008011.hg.1       | -2.50232527                | 0.664908359 | 4.166533751                        |
| GAB2          | TC1100011744.hg.1       | -2.493958283               | 0.333076753 | 2.52447665                         |
| GARNL3        | TC0900012173.hg.1       | -2.492062066               | 0.333076753 | 2.882514769                        |
| TCF7L1        | TC0200008236.hg.1       | -2.392933686               | 3.845686185 | 2.717667582                        |
| EPHB4         | TC0700012016.hg.1       | -2.378166679               | 1.607801004 | 3.606314791                        |
| FNBP1L        | TC0100009064.hg.1       | -2.295552881               | 0.664908359 | 3.409026939                        |
| CTD-2022H16.3 | TSUnmapped00000551.hg.1 | -2.281694938               | 2.472534784 | 3.104655086                        |
| 41698         | TC0100011665.hg.1       | -2.275536667               | 3.845686185 | 3.812203146                        |
| PTX3          | TC0300009301.hg.1       | -2.208610733               | 1.607801004 | 2.765301272                        |

|             |                   |              |             |              |
|-------------|-------------------|--------------|-------------|--------------|
| ANKRD1      | TC1000011400.hg.1 | -2.185797751 | 3.845686185 | 18.27652646  |
| FAM60BP     | TC1800008335.hg.1 | -2.18189549  | 3.845686185 | 2.346307336  |
| FZD3        | TC0800007137.hg.1 | -2.169402879 | 0.407942629 | 3.184249393  |
| ZSCAN2      | TC1500008154.hg.1 | -2.133709841 | 0.407942629 | 3.335953857  |
| LMO7        | TC1300009980.hg.1 | -2.06197356  | 2.472534784 | 3.780376698  |
| SMO         | TC0700009082.hg.1 | -2.035855854 | 2.472534784 | 5.492855476  |
| PRR3        | TC0600007534.hg.1 | -1.945878772 | 2.472534784 | 2.365397534  |
| KIAA1958    | TC0900008467.hg.1 | -1.934780184 | 2.472534784 | 3.771417847  |
| LBR         | TC0100017488.hg.1 | -1.91663307  | 1.037101959 | 2.159698617  |
| \           | TC1100008409.hg.1 | -1.711243427 | 2.472534784 | 3.356932047  |
| EIF5A2      | TC0300013104.hg.1 | 1.737414119  | 2.472534784 | -2.400586076 |
| ---         | TC0900008537.hg.1 | 1.937475857  | 1.607801004 | -2.599042094 |
| TSPAN4      | TC1100006495.hg.1 | 1.93859643   | 1.607801004 | -2.198358488 |
| sugyby      | TC1100006732.hg.1 | 1.986699032  | 1.607801004 | -3.818960505 |
| kuchoybu    | TC0700010064.hg.1 | 2.001569207  | 2.472534784 | -2.855411492 |
| DSE         | TC0600014177.hg.1 | 2.010910794  | 1.037101959 | -2.734369734 |
| NRP1        | TC1000010273.hg.1 | 2.081530936  | 0.664908359 | -2.627984318 |
| ACSL5       | TC1000008926.hg.1 | 2.102203743  | 2.472534784 | -3.550420739 |
| ZHX3        | TC2000009128.hg.1 | 2.192891097  | 1.037101959 | -2.013859916 |
| FAM225A     | TC0900008481.hg.1 | 2.205574766  | 3.845686185 | -2.490885432 |
| zarvo       | TC1400008679.hg.1 | 2.21819034   | 1.037101959 | -2.428384158 |
| CD109       | TC0600008539.hg.1 | 2.294521513  | 3.845686185 | -3.1373359   |
| LAPTM5      | TC0100013534.hg.1 | 2.351031985  | 0.263891671 | -2.627365054 |
| RP11-20B7.1 | TC0300007852.hg.1 | 2.375454517  | 0.664908359 | -2.714266415 |
| SNAI2       | TC0800010382.hg.1 | 2.384711928  | 0.407942629 | -2.961674997 |
| RFX8        | TC0200013669.hg.1 | 2.397950287  | 0.664908359 | -3.817518989 |
| IL4R        | TC1600007312.hg.1 | 2.400136156  | 0.407942629 | -3.810310764 |
| PDE4DIP     | TC0100009837.hg.1 | 2.414403273  | 1.037101959 | -2.1064534   |
| SETBP1      | TC1800007186.hg.1 | 2.444351905  | 0.664908359 | -3.752495478 |
| MCOLN3      | TC0100014769.hg.1 | 2.447356466  | 1.607801004 | -3.534188525 |
| HMGNS       | TC0X00010172.hg.1 | 2.458818367  | 0.664908359 | -2.521055712 |
| POF1B       | TC0X00010207.hg.1 | 2.489043453  | 0           | -2.463035918 |
| HOMER2      | TC1500010251.hg.1 | 2.49540532   | 1.607801004 | -3.354660261 |
| P2RY2       | TC1100008378.hg.1 | 2.552079168  | 1.037101959 | -2.982607217 |
| POPDC3      | TC0600012709.hg.1 | 2.603757338  | 0.263891671 | -3.799992752 |
| TMOD1       | TC0900008150.hg.1 | 2.672898863  | 3.845686185 | -3.589540893 |
| SLC37A2     | TC1100009408.hg.1 | 2.691633533  | 2.472534784 | -9.340574801 |
| ADTRP       | TC0600010825.hg.1 | 2.839546263  | 3.845686185 | -3.963853565 |
| CPQ         | TC0800008300.hg.1 | 2.847823036  | 0           | -2.232919127 |
| NRP2        | TC0200010545.hg.1 | 2.885496338  | 1.607801004 | -5.574613049 |



|               |                   |             |             |              |
|---------------|-------------------|-------------|-------------|--------------|
| TESPA1        | TC1200010850.hg.1 | 2.959086254 | 1.607801004 | -2.421906775 |
| KCNK3         | TC0200007042.hg.1 | 2.9604714   | 2.472534784 | -6.693236539 |
| IL31RA        | TC0500007432.hg.1 | 2.980985794 | 3.845686185 | -4.135283771 |
| FAM198B       | TC0400012245.hg.1 | 2.999820479 | 2.472534784 | -3.773827118 |
| EPHA4         | TC0200015815.hg.1 | 3.081912353 | 2.472534784 | -4.873789696 |
| TFAP2C        | TC2000007830.hg.1 | 3.110193126 | 3.845686185 | -2.657126046 |
| SLIT2         | TC0400007016.hg.1 | 3.115184441 | 0           | -6.251138642 |
| RNU6-917P     | TC2000008163.hg.1 | 3.150359566 | 2.472534784 | -3.352858658 |
| SLC16A2       | TC0X00007655.hg.1 | 3.239534263 | 0           | -5.520350997 |
| MLPH          | TC0200011251.hg.1 | 3.251494725 | 3.845686185 | -9.51435375  |
| OSBPL6        | TC0200016571.hg.1 | 3.316747456 | 0           | -4.542692549 |
| TMEM255B      | TC1300010007.hg.1 | 3.329144135 | 0.263891671 | -2.689522391 |
| RP11-752L20.3 | TC0400008944.hg.1 | 3.383256363 | 0.263891671 | -4.351993293 |
| CYP4F11       | TC1900009896.hg.1 | 3.383972279 | 0.664908359 | -5.003227312 |
| TPK1          | TC0700012917.hg.1 | 3.397318945 | 1.607801004 | -4.415715835 |
| MMP14         | TC1400006659.hg.1 | 3.458736242 | 0           | -3.700602046 |
| MYO1D         | TC1700010358.hg.1 | 3.515270803 | 0.263891671 | -3.710751353 |
| PRKG2         | TC0400011159.hg.1 | 3.549754701 | 0.263891671 | -2.901666404 |
| ANKH          | TC0500010169.hg.1 | 3.571234823 | 0           | -3.184100781 |
| LAMB3         | TC0100017167.hg.1 | 3.577594809 | 0           | -5.333613683 |
| EPHB1         | TC0300013877.hg.1 | 3.690665535 | 0           | -2.961139929 |
| RP5-875H18.9  | TC1700008231.hg.1 | 3.755191765 | 0.407942629 | -3.100149237 |
| SH3PXD2A      | TC1000011726.hg.1 | 3.755557057 | 1.607801004 | -4.208104894 |
| PHACTR1       | TC0600006976.hg.1 | 3.774805996 | 0           | -2.997393165 |
| ATP2B4        | TC0100011267.hg.1 | 3.931021261 | 1.037101959 | -4.072857485 |
| BCL2A1        | TC1500010184.hg.1 | 3.934076468 | 0.263891671 | -6.55176828  |
| NTNG1         | TC0100009307.hg.1 | 3.934092375 | 0           | -5.340743756 |
| CLMP          | TC1100012615.hg.1 | 4.015123415 | 1.037101959 | -5.549412324 |
| CADPS2        | TC0700012444.hg.1 | 4.0976618   | 1.037101959 | -4.102303793 |
| ATP2B1        | TC1200011474.hg.1 | 4.245077326 | 0.263891671 | -3.699524877 |
| CR1L          | TC0100011417.hg.1 | 4.26752469  | 1.037101959 | -6.779162249 |
| KCND2         | TC0700008918.hg.1 | 4.274053104 | 1.607801004 | -5.918228229 |
| CD68          | TC1700012191.hg.1 | 4.28349083  | 0           | -5.502073199 |
| PREX1         | TC2000009357.hg.1 | 4.2897146   | 0           | -3.858793924 |
| MME           | TC0300009258.hg.1 | 4.341583758 | 0.407942629 | -3.484983116 |
| MTSS1         | TC0800011713.hg.1 | 4.393003808 | 0           | -5.16911154  |
| GLT8D2        | TC1200011752.hg.1 | 4.42430241  | 0.263891671 | -13.02776774 |
| SEL1L3        | TC0400010282.hg.1 | 4.473816758 | 1.037101959 | -5.025555244 |
| PPP4R4        | TC1400008058.hg.1 | 4.499254318 | 0           | -4.385510122 |

|           |                   |             |             |              |
|-----------|-------------------|-------------|-------------|--------------|
| CSTA      | TC0300008550.hg.1 | 4.541076214 | 0           | -4.451465373 |
| STEAP2    | TC0700008293.hg.1 | 4.55836121  | 1.037101959 | -4.360839823 |
| PROX1     | TC0100011566.hg.1 | 4.643514318 | 0           | -4.491378582 |
| DPP4      | TC0200014764.hg.1 | 4.789068817 | 1.607801004 | -5.917287532 |
| ---       | TC0600009216.hg.1 | 4.881460984 | 0.263891671 | -3.078614728 |
| KCNAB2    | TC0100006675.hg.1 | 4.909964465 | 0           | -2.097048168 |
| STEAP1B   | TC0700010443.hg.1 | 5.329541475 | 0           | -4.007269857 |
| PAG1      | TC0800010926.hg.1 | 5.414377269 | 0           | -3.330535901 |
| CAMK2N1   | TC0100013182.hg.1 | 5.532449332 | 0           | -7.234500113 |
| PPP1R14C  | TC0600009831.hg.1 | 5.582812099 | 0           | -4.254693874 |
| EDNRA     | TC0400008943.hg.1 | 5.744239226 | 0.407942629 | -11.22627189 |
| SIRPA     | TC2000006501.hg.1 | 5.881272484 | 0           | -3.48892681  |
| TRIML2    | TC0400012696.hg.1 | 5.921229752 | 0           | -3.138032585 |
| ---       | TC1900011214.hg.1 | 6.16400237  | 0           | -4.450466804 |
| GOS2      | TC0100011453.hg.1 | 6.23476781  | 0           | -3.556266234 |
| SIRPD     | TC2000009969.hg.1 | 6.292151175 | 0.407942629 | -10.36716363 |
| CD82      | TC1100007394.hg.1 | 6.422328677 | 0           | -23.59947729 |
| VDR       | TC1200010559.hg.1 | 6.424627978 | 1.607801004 | -10.46185422 |
| MAGEC2    | TC0X00011001.hg.1 | 6.54786427  | 0           | -1.935215192 |
| ---       | TC0300011389.hg.1 | 6.721417021 | 0           | -6.022566144 |
| RAB27B    | TC1800007360.hg.1 | 6.74721827  | 0           | -8.690087278 |
| BACE2     | TC2100007198.hg.1 | 6.974796702 | 0           | -6.06058196  |
| XDH       | TC0200012163.hg.1 | 7.272799228 | 0           | -4.21040788  |
| ---       | TC0900008601.hg.1 | 7.421623167 | 0.407942629 | -4.96236894  |
| STEAP1    | TC0700008292.hg.1 | 8.129718603 | 0           | -6.031375262 |
| SIRPB1    | TC2000009970.hg.1 | 8.146530884 | 0.263891671 | -31.66886666 |
| RIMS2     | TC0800008487.hg.1 | 8.212628278 | 0           | -5.471987748 |
| THBS2     | TC0600013998.hg.1 | 8.610560089 | 0           | -7.779556975 |
| LINC00973 | TC0300008123.hg.1 | 8.62080843  | 0           | -3.695842644 |
| SLC16A6   | TC1700011558.hg.1 | 8.637526111 | 1.607801004 | -26.92650976 |
| PTPRU     | TC0100007584.hg.1 | 8.655144064 | 0           | -10.12716179 |
| FEZ1      | TC1100012708.hg.1 | 9.233914239 | 0           | -8.743379382 |
| NTRK2     | TC0900007752.hg.1 | 9.533549806 | 0.263891671 | -11.02260259 |
| reniru    | TC2000008164.hg.1 | 9.888974482 | 0           | -8.346515341 |
| SLC14A1   | TC1800007198.hg.1 | 10.41461005 | 0           | -86.26066901 |
| DUSP10    | TC0100017420.hg.1 | 10.4417968  | 0           | -8.818196751 |
| starawbo  | TC0100013053.hg.1 | 11.28481477 | 0           | -3.637540556 |
| NOV       | TC0800008667.hg.1 | 11.93727181 | 2.472534784 | -10.97107254 |
| AOX1      | TC0200010421.hg.1 | 13.0955296  | 0           | -6.792429407 |
| ADAMTS9   | TC0300011391.hg.1 | 13.83054481 | 0           | -17.27061238 |
| WFDC2     | TC2000007492.hg.1 | 14.3234521  | 0.664908359 | -16.04767068 |

|           |                   |             |             |              |
|-----------|-------------------|-------------|-------------|--------------|
| ITGA11    | TC1500009861.hg.1 | 15.8731476  | 0.263891671 | -35.12455396 |
| ---       | TC2000009931.hg.1 | 16.00313241 | 0           | -4.557135707 |
| SSX1      | TC0X00007176.hg.1 | 16.66698218 | 0           | -7.074420624 |
| TSPAN18   | TC1100007400.hg.1 | 17.20424588 | 0           | -16.16090405 |
| PARM1     | TC0400007868.hg.1 | 17.7883721  | 0           | -10.60940615 |
| CTSS      | TC0100015752.hg.1 | 18.93459511 | 0           | -33.90806768 |
| ---       | TC2000009329.hg.1 | 19.19431053 | 0           | -5.900531854 |
| SEMA5A    | TC0500010043.hg.1 | 22.73633009 | 0.407942629 | -21.15614212 |
| PRLR      | TC0500010480.hg.1 | 24.11042901 | 0           | -22.05171058 |
| DNER      | TC0200015958.hg.1 | 24.31982878 | 0           | -14.22025075 |
| TNFRSF11B | TC0800011611.hg.1 | 24.55307678 | 0           | -28.99905535 |
| MAN1A1    | TC0600013010.hg.1 | 33.21966225 | 0           | -2.903634776 |
| WNT5A     | TC0300011247.hg.1 | 36.39312838 | 0           | -25.21837948 |
| IL13RA2   | TC0X00010557.hg.1 | 38.79299479 | 0           | -6.721115362 |
| MMP1      | TC1100012131.hg.1 | 50.28268382 | 0           | -18.91144023 |
| STC1      | TC0800009891.hg.1 | 58.5209824  | 0           | -38.39723889 |
| stawswu   | TC0900008530.hg.1 | 78.5390731  | 0           | -24.85262495 |
| TNC       | TC0900011305.hg.1 | 176.6674056 | 0           | -24.13134349 |
